# Supplementary material
Source: Royal Society of Chemistry journal article supplement (doi:10.1039/d5ob01970b)
Supplement: d5ob01970b2.pdf [file d5ob01970b2.pdf]

## Electronic Supporting Information

### **Bovine Serum Albumin: An Efficient and Green Biocatalyst for the One-Pot, Three-Component Synthesis of Valuable Imidazole *N*-oxides in H<sub>2</sub>O-EtOH Medium**

Koustav Singha<sup>a</sup>, Imran Habib<sup>a</sup>, Pintu Pratihar<sup>b</sup>, Dilip Kumar Maiti<sup>b\*</sup>, Mossaraf Hossain<sup>a\*</sup>

<sup>a</sup>*Synthetic Organic Research Laboratory at MMTTC (HRDC), Department of Chemistry, University of North Bengal, Siliguri, Darjeeling, 734013, India*

<sup>b</sup>*Department of Chemistry, University of Calcutta, 92 A. P. C. Road, Kolkata-700009, India*

\*Corresponding author; E-mail: [mossarafchem@nbu.ac.in](mailto:mossarafchem@nbu.ac.in)

### **Table of Contents**

|                                                                                        |     |
|----------------------------------------------------------------------------------------|-----|
| General Information.....                                                               | S2  |
| Methods.....                                                                           | S2  |
| Synthesis .....                                                                        | S2  |
| General Procedure for the Synthesis of $\alpha$ -Benzil Monoxime (3b) .....            | S2  |
| General Procedure for the Synthesis of Imidazole <i>N</i> -oxides .....                | S3  |
| General Procedure for the Gram-scale Synthesis of Imidazole <i>N</i> -oxide (4aa)..... | S3  |
| Characterization Data of the Products .....                                            | S3  |
| Spectral Data of <sup>1</sup> H-NMR and <sup>13</sup> C-NMR .....                      | S14 |
| Green Chemistry Parameters Calculations .....                                          | S48 |
| Reference .....                                                                        | S54 |

## General Information

All commercially available reagents, such as aldehydes, amines, monoximes, ammonium acetate, and hydroxylamine hydrochloride, were used without further purification. The aldehydes and amines were purchased from several companies, which are Acros, Sigma-Aldrich, and Thomas and Baker Merck. Ammonium acetate and benzil were purchased from Loba Chemie. Hydroxylamine hydrochloride was purchased from Research-Lab Fine Chem Industries. 2,3-Butanedione monoxime was Hyma Synthesis Private Limited (Formerly Avra Synthesis Pvt. Ltd.). Ethanol was purchased from Changshu Hongsheng Fine Chemical Co., Ltd. Methanol and sodium hydroxide were purchased from Sisco Research Laboratories Pvt. Ltd. (SRL). Incubator Shaker was purchased from Riviera Glass Pvt. Ltd. The glasswares used for work were dried in the oven and cooled.

## Methods

$^1\text{H}$  (300 MHz) spectra and  $^{13}\text{C}$  (75 MHz) nuclear magnetic resonance (NMR) spectra were recorded on a *Bruker Avance* 300 spectrometer. Chemical shifts ( $\delta$ ) are provided in ppm unit, and tetramethylsilane (TMS,  $\delta$  0.00 ppm) was used as reference. Infrared (IR) spectra were recorded on a *Schimidzu* FTIR-8300 spectrometer in the 4000 – 400  $\text{cm}^{-1}$  region as in KBr pellets or neat, or solution. The given unit of absorption is  $\text{cm}^{-1}$  (wave numbers). MICROMASS QUATTRO II triple quadruple mass spectrometer was used for the electron-spray mass spectra. The FAB MS analyses were taken on a Jeol SX 102/Da-600 mass spectrometer, Argon/Xenon (6 kV, 10mA) was used as the FAB gas in Data System. The accelerating voltage was 10 kV, and the spectra were taken at room temperature.

## Synthesis

### General Procedure for the Synthesis of $\alpha$ -Benzil Monoxime (**3b**)

The previously reported approach was followed to produce  $\alpha$ -benzil monoxime (**3b**)<sup>1</sup>. Benzil (1 equiv., 100 mmol, 21g) was ground to a thin paste by adding a little bit of ethanol, followed by the addition of a concentrated aqueous solution of hydroxylamine hydrochloride (1.25 equiv., 125 mmol, 8.75 g). After that, an ice bath was used to cool down the reaction mixture to -5 °C, and stirred, followed by the dropwise addition of 20% aqueous solution of sodium hydroxide (3 equiv., 300 mol, 12 g) to the stirring reaction mixture. The process was handled attentively to maintain the temperature of the process below 0 °C. After 90 minutes, water was added to dilute the mixture and filtered to remove the unreacted benzil. Next, acetic acid was added to the filtrate to acidify the solution and allowed to rest for 30 minutes to acquire the

crude pinkish  $\alpha$ -benzil monoxime. Then, the product was collected in 60% aqueous ethanol, and the recrystallized product was obtained (16.3 g, 72.44%, m.p. 142 °C).

### General Procedure for the Synthesis of Imidazole *N*-oxides

In a 50 mL round-bottom flask, monoxime (**3a** or **3b**) (1.0 mmol, 1.0 equiv.), aromatic aldehydes (1.0 mmol, 1.0 equiv.), and ammonium acetate, or hydroxylamine hydrochloride, or amines (1.0 mmol, 1.0 equiv.) were taken in the presence of 50 mg BSA in 5 mL of a mixture of deionized water-ethanol solvents in a 4:6 ratio. The mixture was put in the incubator shaker and was shaken at 60 °C for 5 hrs. After that, the reaction mixture was cooled down to room temperature. If needed, maybe 1-2 mL of ethanol can be added to fully precipitate the catalyst BSA. Then, the solvent mixture was filtered, and the organic part was collected as filtrate, and BSA was collected as residue in filter paper. After that, the solvent was removed under vacuum and washed with 1-2 mL ethyl acetate to obtain imidazole *N*-oxides. Then, the imidazole *N*-oxide was recrystallized in ethanol.

### General Procedure for the Gram-scale Synthesis of Imidazole *N*-oxide (**4aa**)

In a 100 mL round-bottom flask, 15 mmol of 2,3-butanedione monoxime (1.0 equiv., 1.5 g), 15 mmol of 3-nitrobenzaldehyde (1.0 equiv., 2.3 g), and 15 mmol of ammonium acetate (1.0 equiv., 1.2 g) were taken in 30 mL of solvent mixture of ethanol and deionized water in a 6:4 ratio, in the presence of 750 mg of BSA. The reaction mixture was shaken in the incubator shaker at 60 °C for 5 hrs. After that, the reaction mixture was cooled down to room temperature. Then the reaction mixture was filtered and concentrated under vacuum. The filtrate was collected, and after some time, the crystals started to precipitate, and pure corresponding imidazole *N*-oxide **4aa** was obtained. After washing the imidazole *N*-oxide in ethyl acetate, the yield was calculated.

### Characterization Data of the Products

#### 2-(3-Nitrophenyl)-4,5-dimethyl Imidazole 3-oxide [**4aa**]<sup>2</sup>:

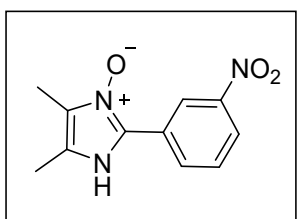

M.P.: 172-174 °C, <sup>1</sup>HNMR (400 MHz, DMSO):  $\delta$  12.76 (s, 1H);  $\delta$  8.77 (s, 1H);  $\delta$  8.23 (d, 1H);  $\delta$  8.10 (d, 1H);  $\delta$  7.61 (d, 1H);  $\delta$  2.02 (6H); <sup>13</sup>CNMR (100 MHz, DMSO): 148.02, 134.68, 132.62, 131.18, 129.55, 128.08, 124.47, 120.60, 119.33, 22.12,

13.37, 8.04. **IR** (*KBr*,  $\text{cm}^{-1}$ ): 3390 (N-H), 3076 (Ar C-H), 2732 (Al C-H), 1646 (C=C), 1523 (C=N), 1347, 1230, 1071  $\text{cm}^{-1}$ . **HRMS** (*ESI/Q-TOF*) *m/z* found for ( $\text{C}_{11}\text{H}_{11}\text{N}_3\text{O}_3$ ): 234.0674 [M+H]<sup>+</sup>, Calculated: 234.0873.

#### 2-(2-Nitrophenyl)-4,5-dimethyl Imidazole 3-oxide [4ab]:

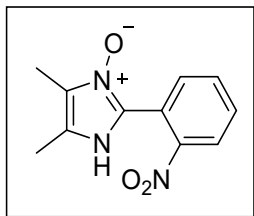

M.P.: 125-127 °C, **<sup>1</sup>H NMR** (300 MHz, DMSO):  $\delta$  11.750 (s, 1H);  $\delta$  7.950 (d, 1H);  $\delta$  7.756 (dd, 1H),  $\delta$  7.680 (d, 1H),  $\delta$  7.623 (dd, 1H),  $\delta$  2.05 (s, 3H);  $\delta$  2.01 (s, 3H); **<sup>13</sup>C NMR** (100 MHz, DMSO): 148.49, 133.30, 131.71, 129.92, 124.69, 123.17, 13.01, 7.74. **IR** (*KBr*,  $\text{cm}^{-1}$ ): 3390 (N-H), 3050 (Ar C-H), 2921 (Al C-H), 1611 (C=C), 1508 (C=N), 1366, 1205, 1096. **HRMS** (*ESI/Q-TOF*) *m/z* found for ( $\text{C}_{11}\text{H}_{12}\text{N}_2\text{O}$ ): 234.0822 [M+H]<sup>+</sup>, Calculated: 234.0873.

#### 2-(4-Methoxy phenyl)-4,5-dimethyl Imidazole 3-oxide [4ac]<sup>2</sup>:

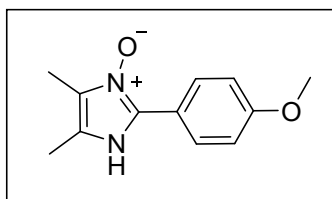

M.P.: 138-140 °C, **<sup>1</sup>H NMR** (300 MHz, DMSO):  $\delta$  8.35 (d, 2H);  $\delta$  6.96 (d, 2H);  $\delta$  3.77 (s, 1H);  $\delta$  2.05 (s, 4H);  $\delta$  1.79 (s, 2H); **<sup>13</sup>C NMR** (75 MHz, DMSO): 172.91, 158.64, 135.60, 127.14, 124.40, 122.75, 121.49, 113.55, 11.80, 7.32. **IR** (*KBr*,  $\text{cm}^{-1}$ ): 3409 (N-H), 3152 (Ar C-H), 2921 (Al C-H), 1614 (C=C), 1507 (C=N), 1384, 1262, 1031. **HRMS** (*ESI/Q-TOF*) *m/z* found for ( $\text{C}_{12}\text{H}_{14}\text{N}_2\text{O}_2$ ): 219.0931 [M+H]<sup>+</sup>, Calculated: 219.1129.

#### 2-(3-Methoxyphenyl)-4,5-dimethyl Imidazole 3-oxide [4ad]:

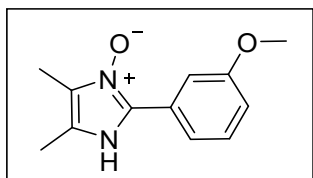

M.P.: 118-120 °C, **<sup>1</sup>H NMR** (300 MHz, DMSO):  $\delta$  10.05 (s, 1H);  $\delta$  7.65-7.60 (m, 2H);  $\delta$  7.287 (dd, 1H);  $\delta$  6.885 (d, 1H);  $\delta$  3.76 (s, 3H);  $\delta$  2.05 (s, 3H);  $\delta$  2.00 (s, 3H); **<sup>13</sup>C NMR** (75 MHz, DMSO): 159.02; 134.19; 129.41; 128.90; 124.31; 123.96; 117.83;

113.61; 110.69; 54.97; 11.03; 7.19. **IR (KBr,  $cm^{-1}$ ):** 3418 (N-H), 3076 (Ar C-H), 1603 (C=C), 1559 (C=N), 1404, 1238, 1108, 1034. **HRMS (ESI/Q-TOF)  $m/z$  found for ( $C_{12}H_{14}N_2O_2$ ):** 219.0932 [M+H]<sup>+</sup>, Calculated: 219.1129.

**2-(4-*N,N*-dimethylphenyl)-4,5-dimethyl Imidazole 3-oxide [4ae]<sup>2</sup>:**

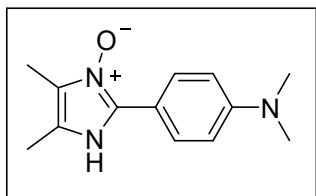

M.P.: 233-235 °C, **<sup>1</sup>HNMR (400 MHz, DMSO):**  $\delta$  7.98 (d, 2H);  $\delta$  7.24 (d, 2H);  $\delta$  2.94 (s, 6H);  $\delta$  2.08 (s, 3H);  $\delta$  2.05 (s, 3H); **<sup>13</sup>CNMR (75 MHz, DMSO):** 150.54; 135.29; 127.73; 124.27; 119.69; 112.32; 111.38; 40.03; 9.56; 7.13. **IR (KBr,  $cm^{-1}$ ):** 3390 (N-H), 3050 (Ar C-H), 2921 (Al C-H), 1611 (C=C), 1508 (C=N), 1366, 1205, 1096  $cm^{-1}$ ; **HRMS (ESI/Q-TOF)  $m/z$  found for ( $C_{12}H_{14}N_2O_2$ ):** 232.1209 [M+H]<sup>+</sup>, Calculated: 232.1444.

**2-(4-Hydroxy phenyl)-4,5-dimethyl Imidazole 3-oxide [4af]<sup>2</sup>:**

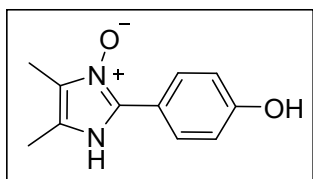

M.P.: >260 °C, **<sup>1</sup>HNMR (300 MHz, DMSO):**  $\delta$  7.89 (d, 2H);  $\delta$  6.77 (d, 2H);  $\delta$  2.03 (s, 3H);  $\delta$  1.98 (s, 3H); **<sup>13</sup>CNMR (75 MHz, DMSO):** 157.18; 135.49; 127.21; 123.50; 122.66; 119.36; 114.92; 11.52; 7.28. **IR (KBr):** 3409 (N-H), 3059 (Ar C-H), 2923 (Al C-H), 1654, 1614 (C=C), 1512 (C=N), 1380, 1286, 1095  $cm^{-1}$ . **HRMS (ESI/Q-TOF)  $m/z$  found for ( $C_{11}H_{12}N_2O_2$ ):** 205.0810 [M+H]<sup>+</sup>, Calculated: 205.0972.

**2-(2-Hydroxyphenyl)-4,5-dimethyl Imidazole 3-oxide [4ag]:**

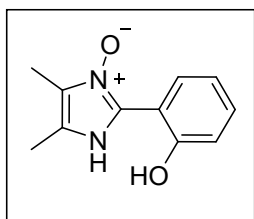

M.P.: 233-235 °C, **<sup>1</sup>HNMR (300 MHz, DMSO):**  $\delta$  7.52 (d, 1H);  $\delta$  7.26 (t, 1H);  $\delta$  6.88 (d, 2H);  $\delta$  2.15 (s, 3H);  $\delta$  2.06 (s, 3H);  $\delta$  1.77 (s, 1H); **<sup>13</sup>CNMR (75 MHz, DMSO):** 157.39; 134.28; 130.67; 127.37; 123.24; 123.10; 119.02; 118.21; 114.19; 10.16; 7.03. **IR (KBr,**

$cm^{-1}$ ): 3400(N-H), 3047 (Ar C-H), 2904 (Al C-H), 1649, 1602 (C=C), 1496(C=N), 1305, 1269, 1154, 1087. **HRMS (ESI/Q-TOF)  $m/z$  found for ( $C_{11}H_{12}N_2O_2$ ):** 205.0908 [M+H]<sup>+</sup>, Calculated: 205.0972.

**2-(4-Hydroxy-3-methoxyphenyl)-4,5-dimethyl Imidazole 3-oxide [4ah]:**

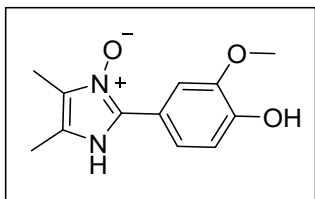

M.P.: 258-259 °C,  **$^1H$ NMR (400 MHz, DMSO):**  $\delta$  7.73 (s, 1H);  $\delta$  7.57 (d, 1H);  $\delta$  6.77 (d, 1H);  $\delta$  3.73 (s, 3H);  $\delta$  2.04 (s, 3H); 1.99 (s, 3H);  **$^{13}C$ NMR (100 MHz, DMSO):** 147.72; 147.30; 136.07; 123.90; 123.36; 120.19; 119.32; 115.63; 110.47; 55.83; 22.98; 11.97; 7.88. **IR (KBr,  $cm^{-1}$ ):** 3418 (N-H), 3057 (Ar C-H), 2923 (Al C-H), 1648 (C=C), 1507 (C=N), 1438, 1279, 1038. **HRMS (ESI/Q-TOF)  $m/z$  found for ( $C_{11}H_{12}N_2O_2$ ):** 235.0868 [M+H]<sup>+</sup>, Calculated: 235.1077.

**2-(2-Furyl)-4,5-dimethyl Imidazole 3-oxide [4ai]:**

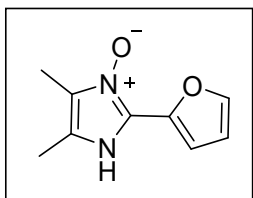

M.P.: 95-97 °C,  **$^1H$ NMR (400 MHz, DMSO):**  $\delta$  7.690 (dd, 1H);  $\delta$  6.845 (d, 1H);  $\delta$  6.552 (dd, 1H);  $\delta$  2.03 (s, 3H);  $\delta$  2.00 (s, 3H);  **$^{13}C$ NMR (100 MHz, DMSO):** 142.85, 142.42, 130.07, 125.60, 122.91, 111.53, 108.02, 11.83, 7.10. **IR (KBr,  $cm^{-1}$ ):** 3466 (N-H), 3085 (Ar C-H), 1559 (C=C), 1528 (C=N), 1400, 1280, 1005. **HRMS (ESI/Q-TOF)  $m/z$  found for ( $C_9H_{10}N_2O_2$ ):** 179.0783 [M+H]<sup>+</sup>, Calculated: 179.0815.

**1-Butyl-2-(4-hydroxyphenyl)-4,5-dimethyl Imidazole 3-oxide [4aj]<sup>2</sup>:**

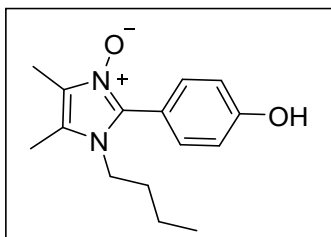

M.P.: 128-130 °C,  **$^1H$ NMR (400 MHz, DMSO):**  $\delta$  2.51 (s, 3H);  $\delta$  2.22 (s, 3H);  $\delta$  1.31-1.39 (m, 2H);  $\delta$  1.09 (t, 2H);  $\delta$  1.05-1.20 (m, 2H);  $\delta$  0.73 (t, 3H);  **$^{13}C$ NMR**

(75 MHz, DMSO): 131.20; 124.16; 119.84; 115.35; 31.59; 18.91; 13.20; 8.53; 7.39. IR (KBr,  $cm^{-1}$ ): 3047 (Ar C-H), 2958 (Al C-H), 1602(C=C), 1544(C=N), 1454, 1340, 1282, 1168, 839.  $m/z$  found for ( $C_{15}H_{20}N_2O_2$ ): 260.15 [M+H]<sup>+</sup>.

**1-Naphthyl-2-(4-hydroxyphenyl)-4,5-dimethyl Imidazole 3-oxide [4ak]<sup>2</sup>:**

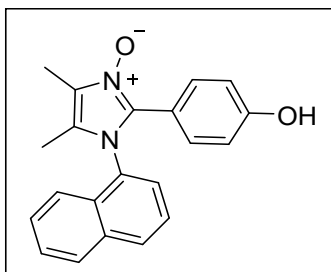

M.P.: 232-235 °C, <sup>1</sup>HNMR (300 MHz, DMSO): δ 6.62 - δ 7.95 (m, 11H); δ 2.00 (t, 6H); <sup>13</sup>CNMR (75 MHz, DMSO): 158.50, 138.24, 136.16, 134.25, 131.35, 128.90, 126.50, 126.34, 124.39, 120.25, 116.25, 109.36, 10.87, 5.62. IR (KBr,  $cm^{-1}$ ): 3058(Ar C-H), 2925 (Al C-H), 7 (C=C), 1560 (C=N), 1510, 1454, 1388, 1245, 1170, 839.  $m/z$  found for  $C_{21}H_{18}N_2O_2$ ): 330.14 [M+H]<sup>+</sup>.

**1-(2-Nitrophenyl)-2-(4-hydroxyphenyl)-4,5-dimethyl Imidazole 3-oxide [4al]<sup>2</sup>:**

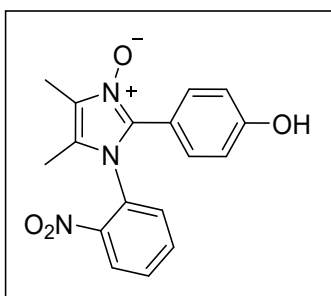

M.P.: 272-273 °C, <sup>1</sup>HNMR (300 MHz, CDCl<sub>3</sub>): δ 8.12 (d, 1H); δ 7.88 (d, 1H); δ 7.59 (d, 2H); δ 7.49 (d, 2H); δ 7.26 (d, 2H); δ 7.02 (d, 2H); δ 4.83 (s, 1H); δ 2.00 (t, 6H); <sup>13</sup>CNMR (75 MHz, CDCl<sub>3</sub>): 159.79, 148.08, 1144.33, 134.40, 132.18, 131.09, 130.01, 129.92, 129.34, 129.19, 128.53, 128.38, 128.30, 127.36, 127.05, 123.49, 122.89, 114.76, 55.51, 10.87, 5.62. IR (KBr,  $cm^{-1}$ ): 3200(Ar C-H), 2929 (Al C-H), 1593 (C=C), 1510 (C=N), 1438, 1350, 1259, 1172, 1105, 837.  $m/z$  found for ( $C_{17}H_{15}N_3O_4$ ): 325.32 [M+H]<sup>+</sup>.

**1-(4-Carboxyphenyl)-2-(4-hydroxyphenyl)-4,5-dimethyl-1H-imidazole 3-oxide [4am]:**

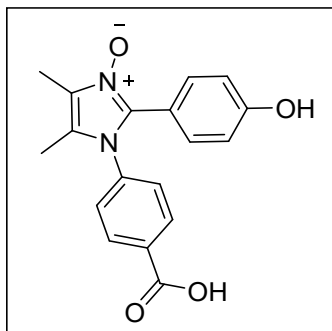

M.P.: 210-213 °C, <sup>1</sup>HNMR (400 MHz, DMSO): 7.61 (d, 1H); 7.38 (d, 1H); 6.92-7.01 (m, 4H), 6.79 (d, 1H); 6.77 (d, 1H); 2.25 (s, 6H); <sup>13</sup>CNMR (100 MHz, DMSO): 160.92, 148.33, 135.37, 134.63, 131.92, 128.35, 124.36, 122.13, 120.06, 116.92, 116.09, 116.02, 110.70, 101.22, 7.68. IR (KBr, cm<sup>-1</sup>): 3219, 2808, 1685, 1605, 1440, 1377, 1280, 1172, 1010, 837. HRMS (ESI/Q-TOF) m/z found for (C<sub>12</sub>H<sub>14</sub>N<sub>2</sub>O<sub>2</sub>): 325.0860 [M+H]<sup>+</sup>, Calculated: 325.1183.

**1-(4-Methoxyphenyl)-2-(4-hydroxyphenyl)-4,5-dimethyl Imidazole 3-oxide [4an]<sup>2</sup>:**

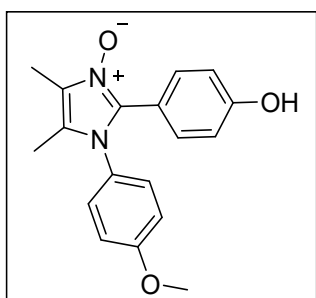

M.P.: 205-207 °C, <sup>1</sup>HNMR (400 MHz, DMSO): δ 10.13 (s, 1H); δ 8.46 (s, 1H); δ 7.75 (d, 2H); δ 7.22 (d, 2H); δ 6.95 (d, 2H); δ 6.88 (d, 2H); δ 3.76 (s, 3H); <sup>13</sup>CNMR (100 MHz, DMSO): 160.82; 158.42; 157.88; 145.20; 130.80; 128.19; 122.56; 116.08, 114.81, 55.72. IR (KBr, cm<sup>-1</sup>): 3170 (Ar C-H), 2929 (Al C-H), 1608(C=C), 1512(C=N), 1461, 1251, 1172, 1031, 833. HRMS (ESI/Q-TOF) m/z found for (C<sub>12</sub>H<sub>14</sub>N<sub>2</sub>O<sub>2</sub>): 311.1120 [M+H]<sup>+</sup>, Calculated: 311.1391.

**1-Hydroxy-2-(4-hydroxyphenyl)-4,5-dimethyl Imidazole 3-oxide [4ao]<sup>2</sup>:**

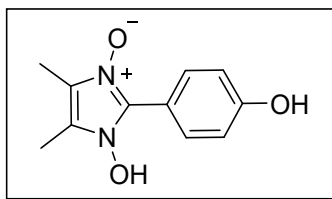

M.P.: 165-168 °C, <sup>1</sup>HNMR (300 MHz, DMSO): δ 7.86 (d, 2H); δ 7.04 (d, 2H); δ 2.27 (s, 6H); δ 2.19 (s, 1H); <sup>13</sup>CNMR (75 MHz, DMSO): 160.83; 135.26; 131.83; 122.09; 116.06; 110.68; 7.64. IR (KBr, cm<sup>-1</sup>): 3400, 3000 (Ar C-H), 2671 (Al C-H), 1611, 1560 (C=C), 1446 (C=N), 1385, 1252, 1178, 1087, 1000, 837 cm<sup>-1</sup>. m/z found for (C<sub>11</sub>H<sub>12</sub>N<sub>2</sub>O<sub>3</sub>): 220.0 [M+H]<sup>+</sup>.

**1-Hydroxy-2-(4-methoxyphenyl)-4,5-dimethyl Imidazole 3-oxide [4ap]<sup>2</sup>:**

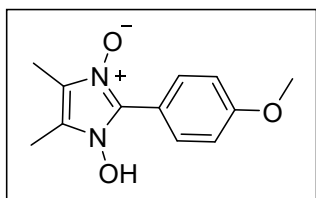

M.P.: 196-198 °C, <sup>1</sup>HNMR (300 MHz, DMSO): δ 8.12 (d, 2H); δ 6.93 (d, 2H); δ 3.78 (s, 3H), δ 1.83 (s, 6H); <sup>13</sup>CNMR (75 MHz, DMSO): 159.10; 129.10; 119.11; 113.21; 55.49; 7.41. IR (KBr, cm<sup>-1</sup>): 3418, 3003 (Ar C-H), 2929 (Al C-H), 1610, 1541 (C=C), 1444 (C=N), 1380, 1296, 1256, 1182, 1026, 837 cm<sup>-1</sup>. HRMS (ESI/Q-TOF) m/z found for (C<sub>12</sub>H<sub>14</sub>N<sub>2</sub>O<sub>3</sub>): 235.0985 [M+H]<sup>+</sup>, Calculated: 235.1078.

**1-Hydroxy-2-(3-nitrophenyl)-4,5-dimethyl Imidazole 3-oxide [4aq]<sup>2</sup>:**

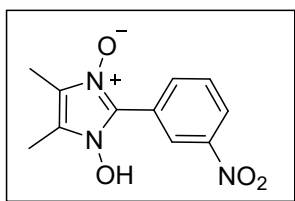

M.P.: 209-211 °C, <sup>1</sup>HNMR (300 MHz, DMSO): δ 9.22 (s, 1H); δ 8.72 (d, 1H); δ 8.05 (d, 1H); δ 7.58 (t, 1H); δ 1.91; <sup>13</sup>CNMR (75 MHz, DMSO): 148.13, 135.79, 131.75, 131.13, 126.37, 124.38, 123.41, 122.13, 7.57. IR (KBr, cm<sup>-1</sup>): 3428, 3088 (Ar C-H), 2927 (Al C-H), 2580, 1634, 1530(C=C), 1435(C=N), 1355, 1284, 1248, 812 cm<sup>-1</sup>. HRMS (ESI/Q-TOF) m/z found for (C<sub>11</sub>H<sub>11</sub>N<sub>3</sub>O<sub>4</sub>): 250.0640 [M+H]<sup>+</sup>, Calculated: 250.0823.

### 1-Hydroxy-2-(4-hydroxy-3-methoxyphenyl)-4,5-dimethyl Imidazole 3-oxide [4ar]:

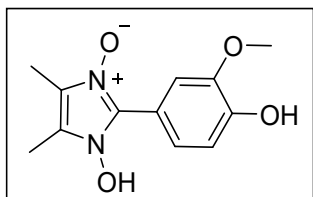

M.P.: 201-203 °C,  $^1\text{HNMR}$  (400 MHz, DMSO):  $\delta$  7.67 (s, 1H);  $\delta$  7.44 (d, 1H);  $\delta$  7.01 (d, 2H);  $\delta$  3.80 (s, 3H);  $\delta$  2.24 (s, 6H).  $^{13}\text{CNMR}$  (100 MHz, DMSO): 150.31, 147.95, 135.40, 128.84, 122.18, 115.97, 114.27, 110.27, 55.61, 7.66. IR (KBr,  $\text{cm}^{-1}$ ): 3390, 3076 (Ar C-H), 2928 (Al C-H), 1636, 1596 (C=C), 1493 (C=N), 1388, 1279, 1205, 1177, 1031, 856  $\text{cm}^{-1}$ . HRMS (ESI/Q-TOF)  $m/z$  found for ( $\text{C}_{12}\text{H}_{14}\text{N}_2\text{O}_2$ ): 251.0796 [M+H] $^+$ , Calculated: 251.1027.

### 1-Hydroxy-2-(2-pyridyl)-4, 5-dimethyl Imidazole 3-oxide [4as]:

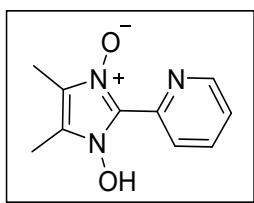

Hygroscopic,  $^1\text{HNMR}$  (400 MHz, DMSO):  $\delta$  11.38 (s, 1H);  $\delta$  8.80 (d, 1H);  $\delta$  8.39 (t, 1H);  $\delta$  8.13 (t, 1H);  $\delta$  7.83 (d, 1H);  $\delta$  1.88;  $^{13}\text{CNMR}$  (100 MHz, DMSO): 153.46, 151.75, 150.39, 147.75, 144.42, 138.22, 126.71, 126.48, 123.43, 123.21, 112.17, 9.81, 7.69. IR (KBr,  $\text{cm}^{-1}$ ): 3400, 3085 (Ar C-H), 2667 (Al C-H), 1621, 1578 (C=C), 1456 (C=N), 1404, 1287, 1194, 1158, 1088, 998, 779  $\text{cm}^{-1}$ . HRMS (ESI/Q-TOF)  $m/z$  found for ( $\text{C}_{12}\text{H}_{14}\text{N}_2\text{O}_2$ ): 206.0701 [M+H] $^+$ , Calculated: 206.0925.

### 2-(4-chlorophenyl)-4,5-dimethyl-1H-imidazole 3-oxide (4at):

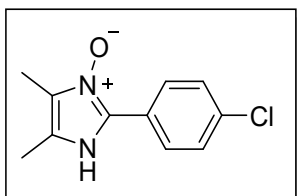

$^1\text{HNMR}$  (400 MHz, DMSO):  $\delta$  7.98 (d, 2H);  $\delta$  7.42 (d, 2H);  $\delta$  2.02 (s, 3H);  $\delta$  2.00 (s, 3H);  $^{13}\text{CNMR}$  (100 MHz, DMSO): 134.63; 132.62; 131.56; 129.02; 128.77; 127.43; 127.21; 125.76; 124.39; 12.04; 7.71. HRMS (ESI/Q-TOF)  $m/z$  found for ( $\text{C}_{11}\text{H}_{11}\text{ClN}_2\text{O}$ ): 223.0543 [M+H] $^+$ , Calculated: 223.0633.

**2-(2-chlorophenyl)-4,5-dimethyl-1H-imidazole 3-oxide (4au):**

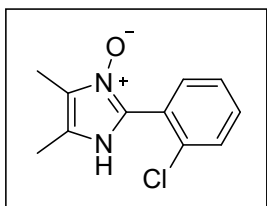

$^1\text{HNMR}$  (400 MHz, DMSO):  $\delta$  12.13 (s, 1H),  $\delta$  7.54 (d, 1H),  $\delta$  7.40-7.40 (m, 1H),  $\delta$  7.35 (d, 2H),  $\delta$  2.04 (s, 3H);  $\delta$  1.09 (s, 3H);  $^{13}\text{CNMR}$  (100 MHz, DMSO): 134.10, 132.93, 132.23, 130.35, 129.48, 126.41, 123.75, 122.97, 10.22, 6.82. **HRMS (ESI/Q-TOF)  $m/z$  found for ( $\text{C}_{11}\text{H}_{11}\text{ClN}_2\text{O}$ ):** 223.0560 [M+H]<sup>+</sup>, Calculated: 223.0633.

**2-(2-chlorophenyl)-1-hydroxy-4,5-dimethyl-1H-imidazole 3-oxide (4av):**

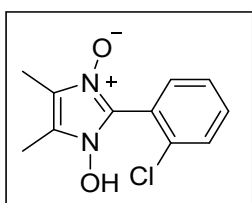

$^1\text{HNMR}$  (400 MHz, DMSO):  $\delta$  7.69 (s, 1H);  $\delta$  6.845 (d, 2H);  $\delta$  6.555 (d, 1H);  $\delta$  2.03 (s, 3H);  $\delta$  2.00 (s, 3H);  $^{13}\text{CNMR}$  (100 MHz, DMSO): 142.13; 142.41; 130.12; 125.68; 122.85; 111.53; 107.96; 11.89; 7.12. **HRMS (ESI/Q-TOF)  $m/z$  found for ( $\text{C}_{11}\text{H}_{11}\text{ClN}_2\text{O}_2$ ):** 239.0550 [M+H]<sup>+</sup>, Calculated: 239.0582.

**2-(4-Hydroxy-3-methoxyphenyl)-4,5-diphenyl Imidazole 3-oxide [4ba]<sup>2</sup>:**

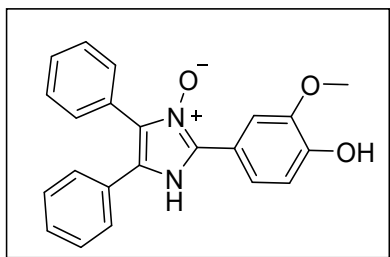

M.P.: 197-199°C,  $^1\text{HNMR}$  (400 MHz, DMSO):  $\delta$  7.79 (s, 1H);  $\delta$  7.61 (d, 1H),  $\delta$  7.20-7.52 (m, 8H);  $\delta$  7.13 (d, 2H);  $\delta$  6.81 (s, 1H);  $\delta$  3.77 (s, 3H);  $^{13}\text{CNMR}$  (100 MHz, DMSO): 147.56, 147.08, 141.08, 136.11, 131.94, 130.71, 128.84, 127.91, 126.79, 126.26, 122.11, 120.54, 111.62, 111.61, 55.94, 22.18. **IR (KBr,  $\text{cm}^{-1}$ ):** 3494 (N-H), 3050 (Ar C-H), 2939 (Al C-H), 1600 (C=C), 1496 (C=N), 1267, 1226, 1029.  **$m/z$  found for ( $\text{C}_{22}\text{H}_{18}\text{N}_2\text{O}_3$ ):** 358.1 [M+H]<sup>+</sup>.

### 2-(4-Methoxyphenyl)-4,5-diphenyl Imidazole 3-oxide [4bb]<sup>2</sup>:

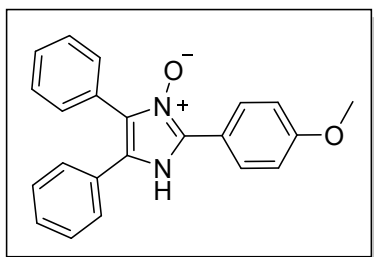

M.P.: 95-96 °C, <sup>1</sup>HNMR (300 MHz, DMSO): δ 9.11 (s, 1H); δ 7.20-7.53 (m, 10H); δ 7.06; δ 6.78; δ 6.32; δ 6.19; δ 5.54; 3.09 (s, 3H); <sup>13</sup>CNMR (75 MHz, DMSO): 158.93, 145.07, 127.95, 126.73, 126.22, 122.61, 113.61, 54.72. IR (KBr, cm<sup>-1</sup>): 3419 (N-H), 3057 (Ar C-H), 2829 (Al C-H), 1608 (C=C), 1494 (C=N), 1298, 1253, 1028, 835, 696. *m/z* found for (C<sub>22</sub>H<sub>18</sub>N<sub>2</sub>O<sub>2</sub>): 342.4 [M+H]<sup>+</sup>.

### 2-(4-Hydroxyphenyl)-4,5-diphenyl Imidazole 3-oxide [4bc]<sup>2</sup>:

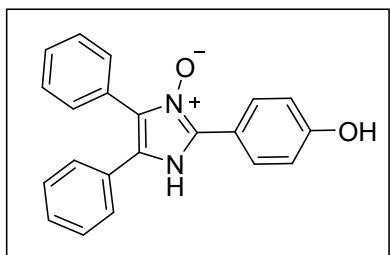

M.P.: 230-233 °C, <sup>1</sup>HNMR (400 MHz, DMSO): δ 8.01 (d, 1H); δ 7.99 δ 7.32-7.51 (m, 4H); δ 7.23 (1 H); δ 7.14 (d, 1H); δ 6.81 (d, 1H); <sup>13</sup>CNMR (100 MHz, DMSO): 157.97, 141.23, 136.11, 131.93, 130.75, 130.71, 128.84, 128.67, 128.45, 128.14, 127.94, 127.83, 126.72, 126.23, 121.62, 115.45. IR (KBr, cm<sup>-1</sup>): 3409 (N-H), 3045 (Ar C-H), 2790 (Al C-H), 1610 (C=C), 1492 (C=N), 1285, 1173, 836, 696. *m/z* found for (C<sub>21</sub>H<sub>16</sub>N<sub>2</sub>O<sub>2</sub>): 328.1 [M+H]<sup>+</sup>.

### 1-(4-Chlorophenyl)-2-(4-hydroxyphenyl)-4,5-diphenyl Imidazole 3-oxide [4bd]<sup>2</sup>:

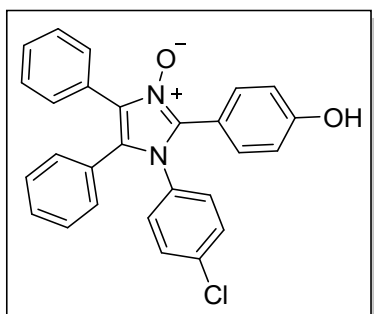

M.P.: 182-184 °C, <sup>1</sup>HNMR (400 MHz, DMSO): δ 10.24 (s, 1H); δ 8.45 (s, 2H); δ 7.77 (d, 4H); δ 7.42 (d, 4H); δ 7.21 (d, 4H); δ 6.89 (d, 4H); <sup>13</sup>CNMR (100 MHz, DMSO): 161.39; 161.25; 151.24; 132.01; 131.72; 131.31; 130.08; 129.97; 129.57;

129.51; 128.88; 128.24; 127.69; 123.18; 116.17. **IR (KBr,  $cm^{-1}$ ):** 3057 (Ar C-H), 2885 (Al C-H), 1602, 1573 (C=C), 1485 (C=N), 1442, 1388, 1284, 1161, 1101, 1008, 902, 835. ***m/z* found for ( $C_{27}H_{19}N_2O_2Cl$ ):** 438.7 [M+H]<sup>+</sup>.

**1-Hydroxy-2-(4-methoxyphenyl)-4,5-diphenyl Imidazole 3-oxide [4be]<sup>2</sup>:**

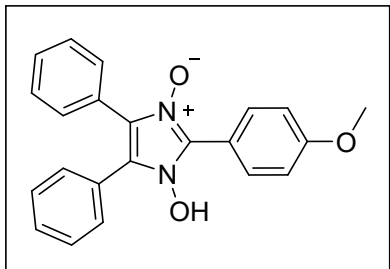

M.P. 233-235 °C, **<sup>1</sup>H NMR (400 MHz, DMSO):**  $\delta$  8.77;  $\delta$  7.51 (2H);  $\delta$  7.16-  $\delta$  7.29 (m, 10H);  $\delta$  6.93 (2H); 3.53 (s, 3H); **<sup>13</sup>C NMR (100 MHz, DMSO):** 159.13; 130.87; 129.54; 128.96; 128.56; 127.97; 127.81; 127.69; 126.55; 114.36; 55.48. **IR (KBr,  $cm^{-1}$ ):** 3431, 3055 (Ar C-H), 2835 (Al C-H), 1608, 1575 (C=C), 1488 (C=N), 1442, 1394, 1301, 1255, 1087, 1029  $cm^{-1}$ . ***m/z* found for ( $C_{22}H_{18}N_2O_3$ ):** 358.3 [M+H]<sup>+</sup>.

## Spectral Data of $^1\text{H-NMR}$ and $^{13}\text{C-NMR}$

$^1\text{HNMR}$  - 2-(3-nitrophenyl)-4,5-dimethyl Imidazole 3-oxide (4aa)

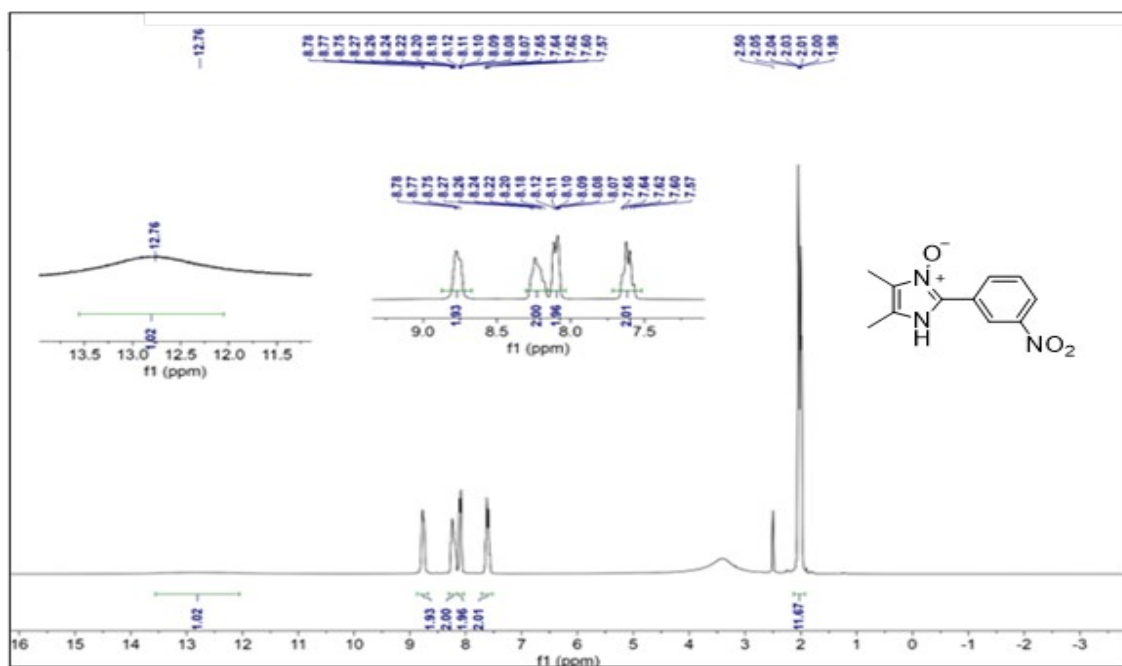

$^{13}\text{CNMR}$  - 2-(3-nitrophenyl)-4,5-dimethyl Imidazole 3-oxide (4aa)

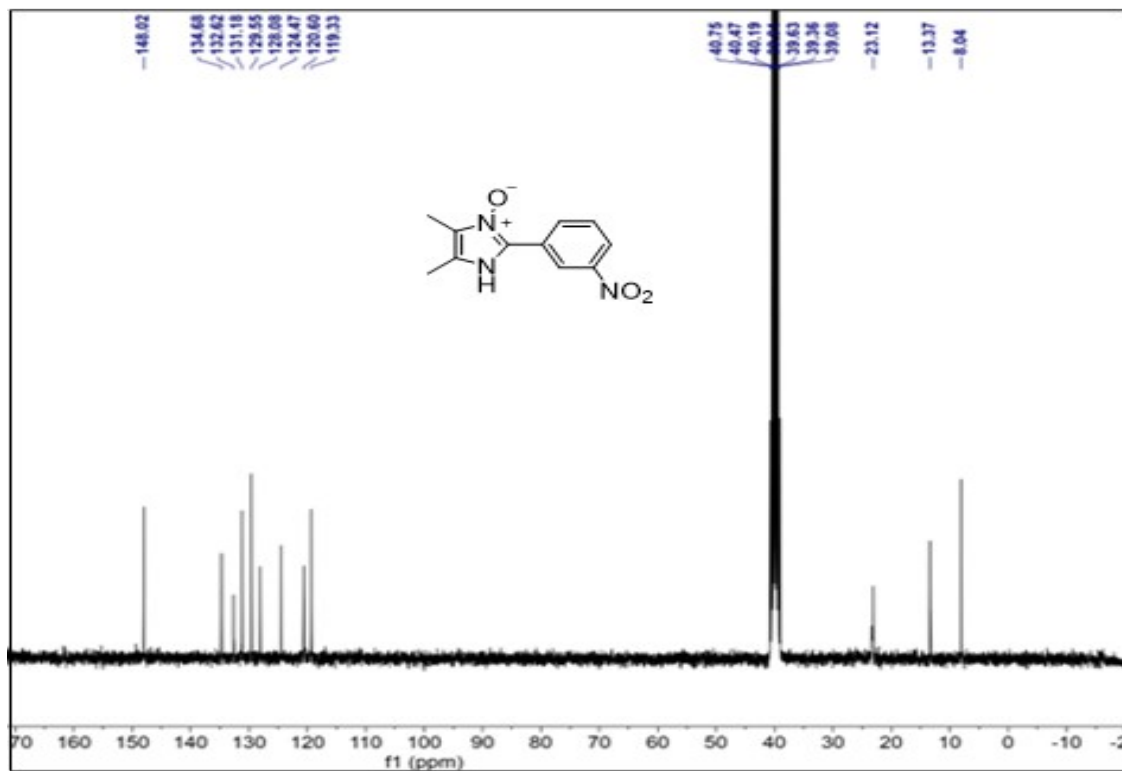

HRMS - 2-(3-nitrophenyl)-4,5-dimethyl Imidazole 3-oxide (4aa)

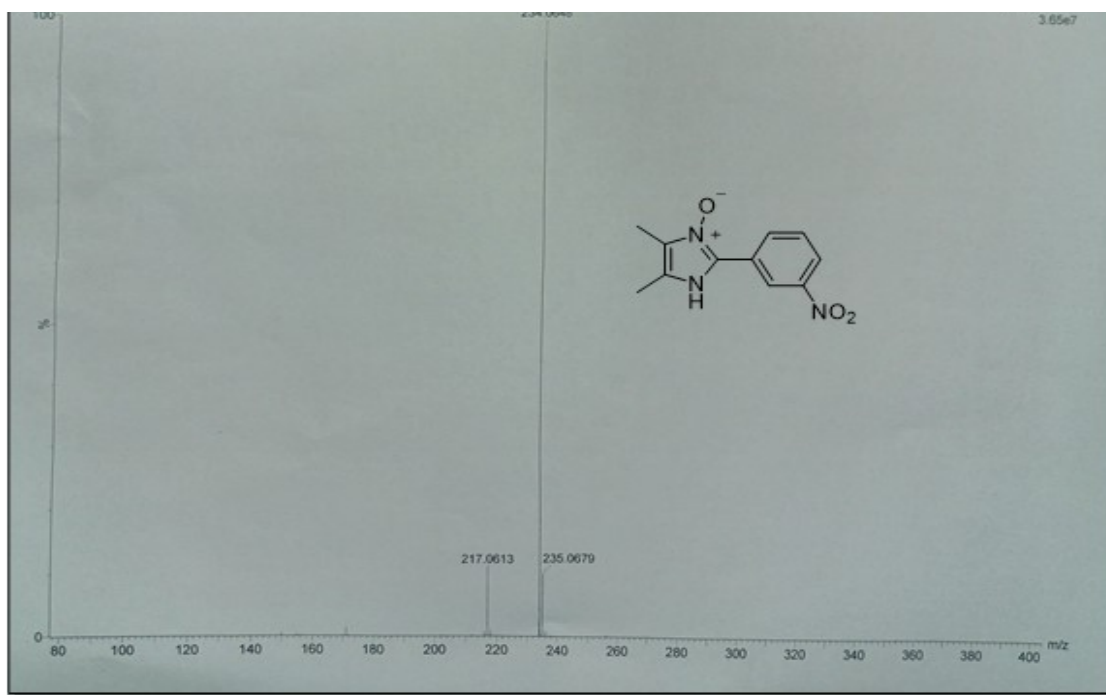

<sup>1</sup>H NMR - 2-(2-nitrophenyl)-4,5-dimethyl Imidazole 3-oxide (4ab)

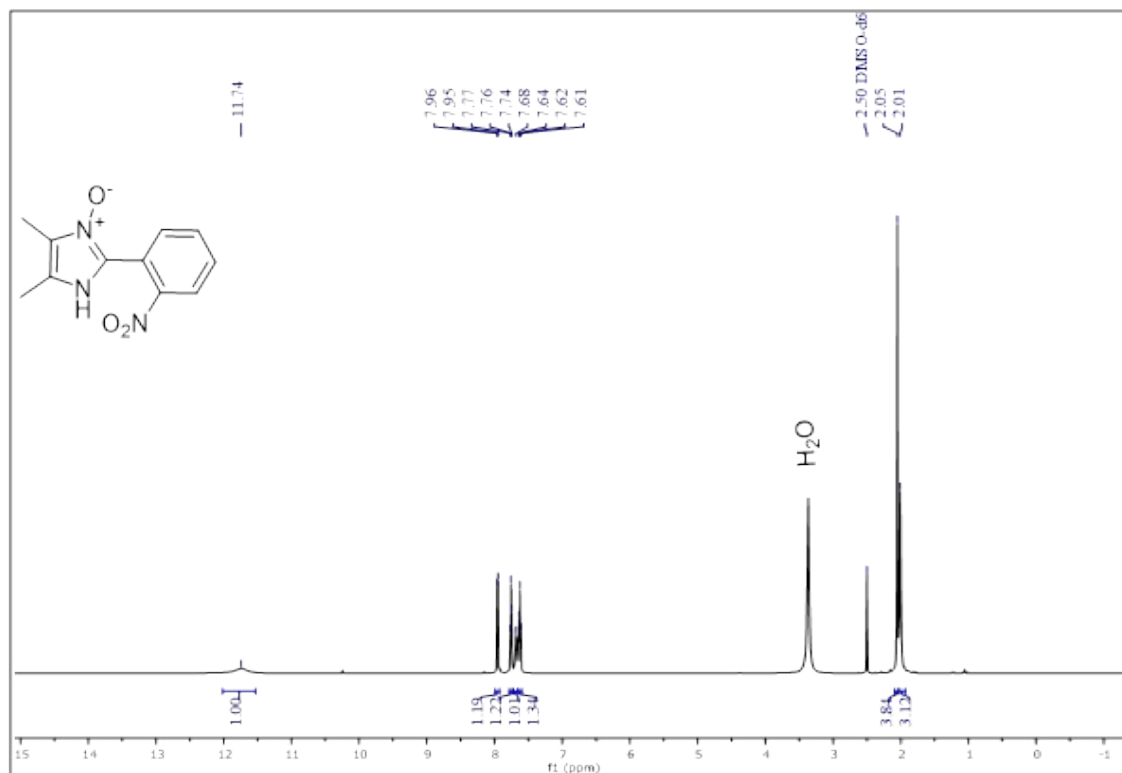

*<sup>13</sup>CNMR - 2-(2-nitrophenyl)-4,5-dimethyl Imidazole 3-oxide (4ab)*

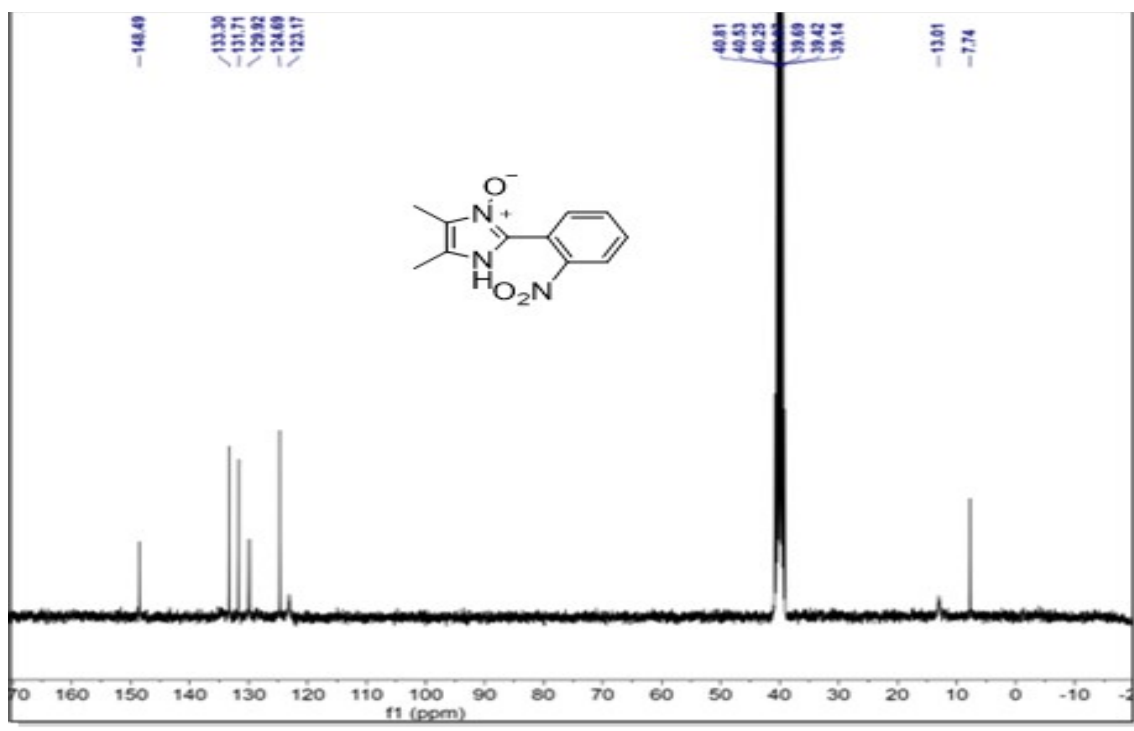

*HRMS - 2-(2-nitrophenyl)-4,5-dimethyl Imidazole 3-oxide (4ab)*

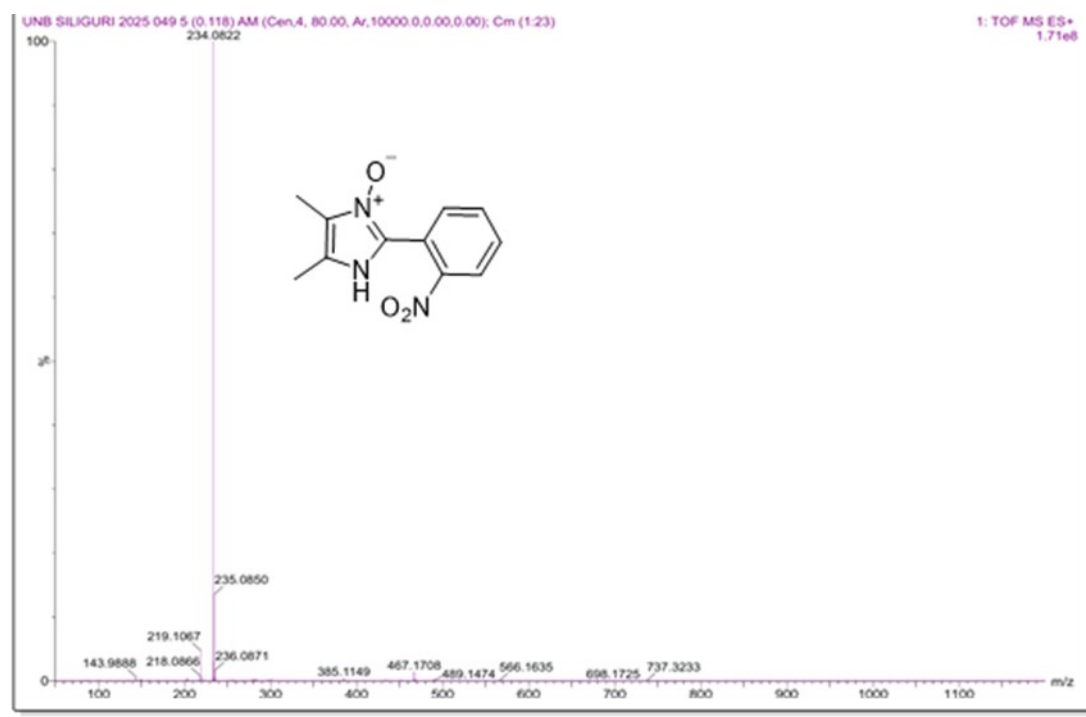

<sup>1</sup>H NMR - 2-(4-methoxy phenyl)-4,5-dimethyl Imidazole 3-oxide (4ac)

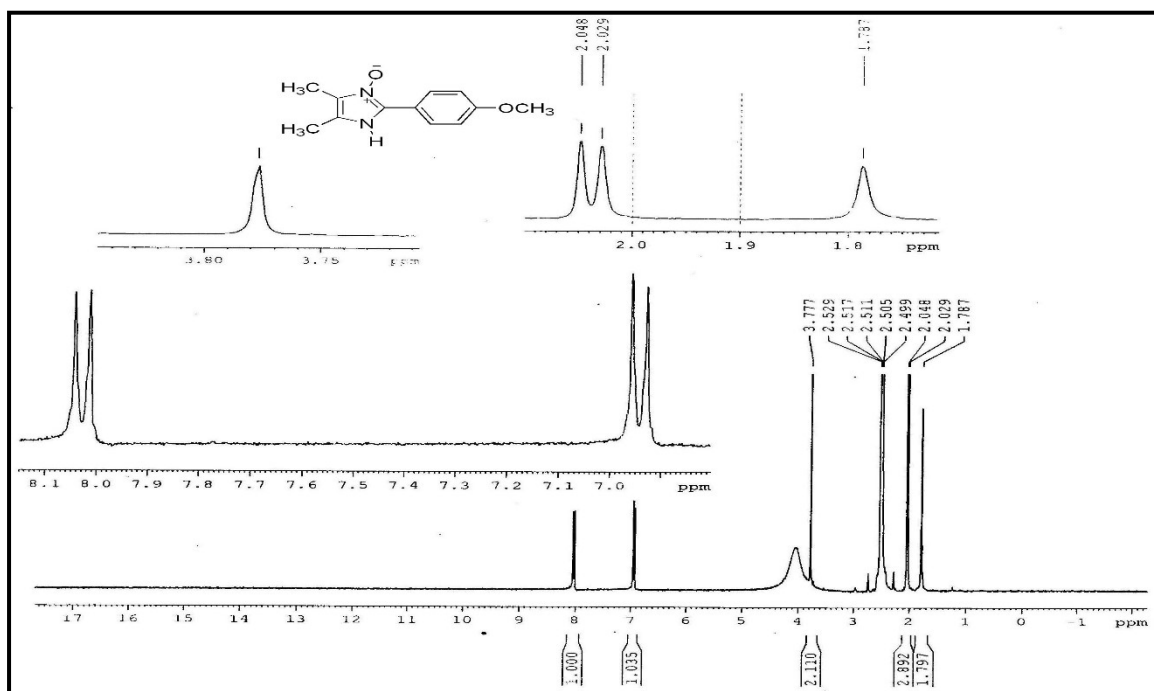

<sup>13</sup>C NMR - 2-(4-methoxy phenyl)-4,5-dimethyl Imidazole 3-oxide (4ac)

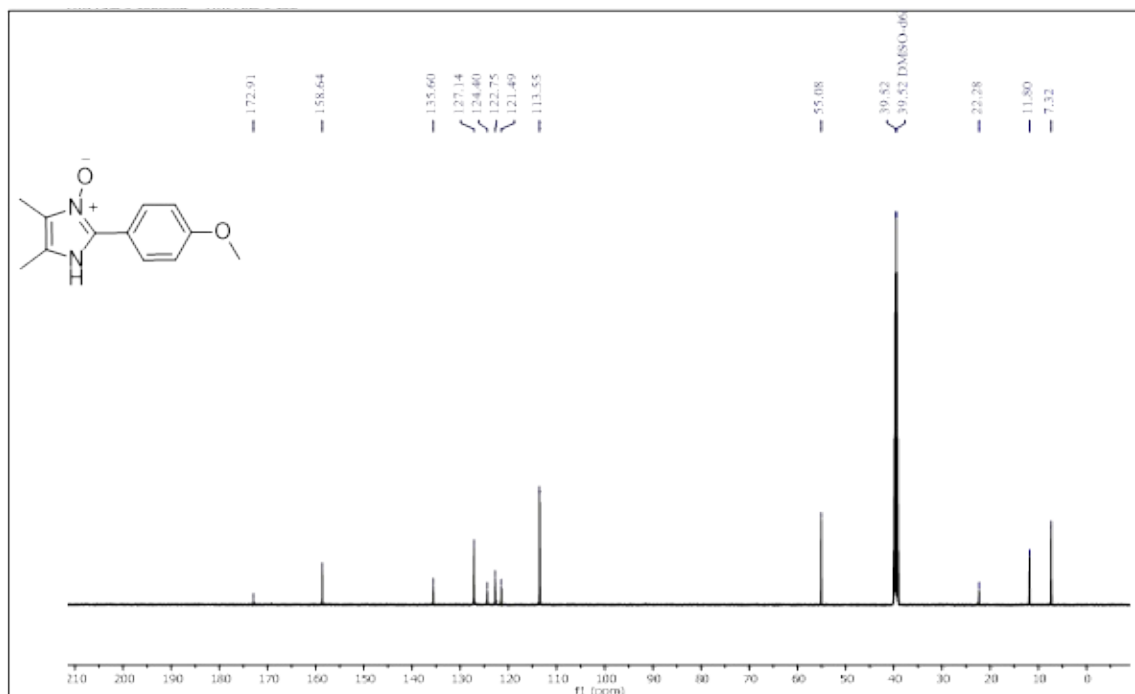

*HRMS - 2-(4-methoxyphenyl)-4,5-dimethyl Imidazole 3-oxide (4ac)*

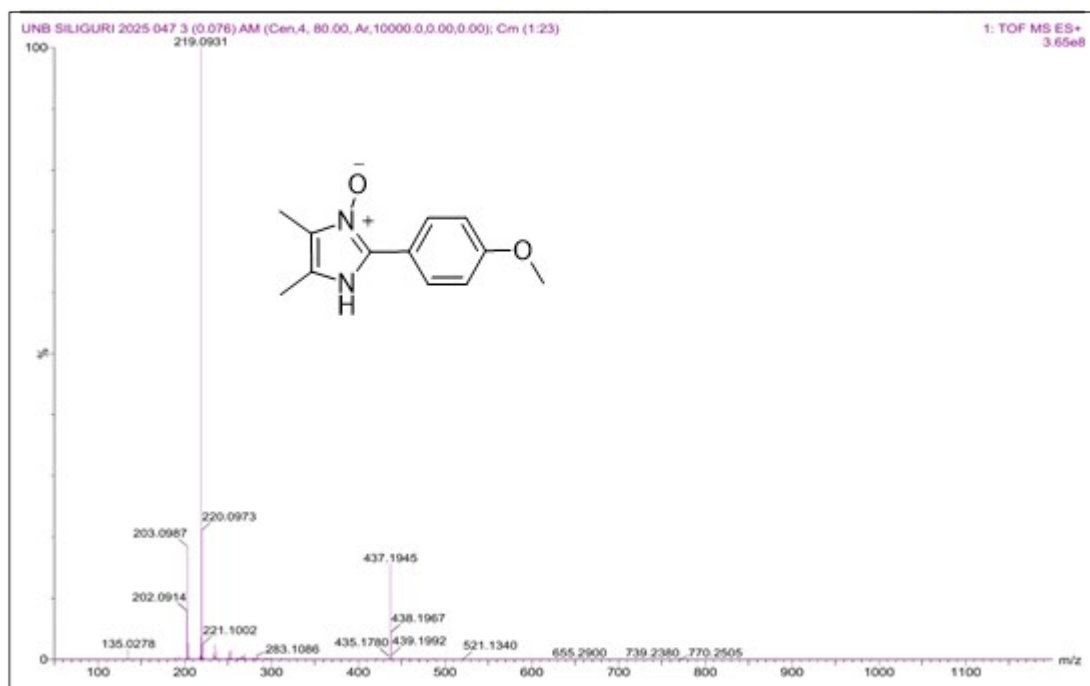

*<sup>1</sup>HNMR - 2-(3-methoxyphenyl)-4,5-dimethyl Imidazole 3-oxide (4ad)*

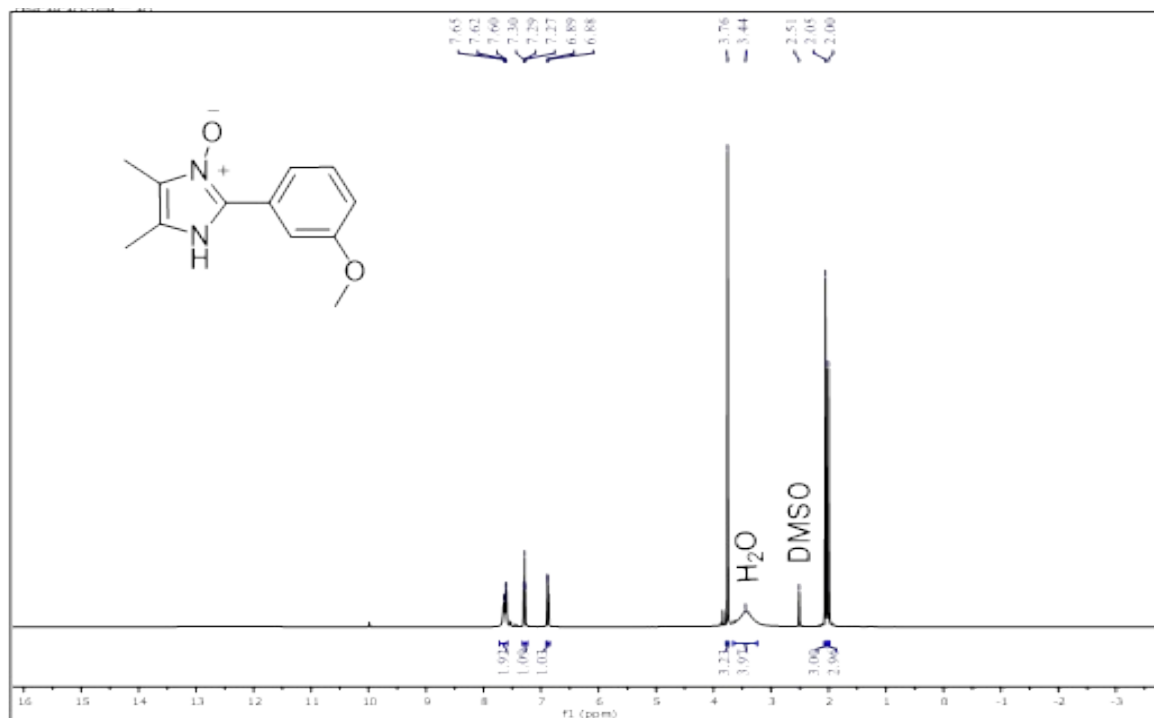

*<sup>13</sup>CNMR - 2-(3-methoxyphenyl)-4,5-dimethyl Imidazole 3-oxide (4ad)*

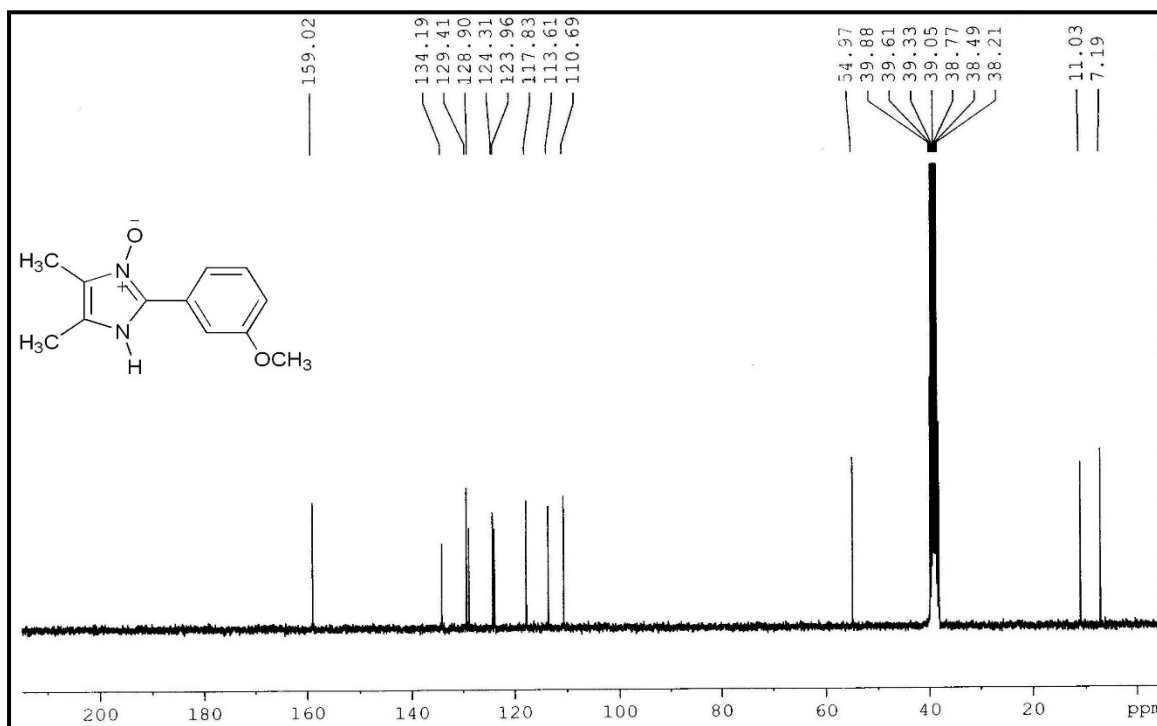

*HRMS - 2-(3-methoxyphenyl)-4,5-dimethyl Imidazole 3-oxide (4ad)*

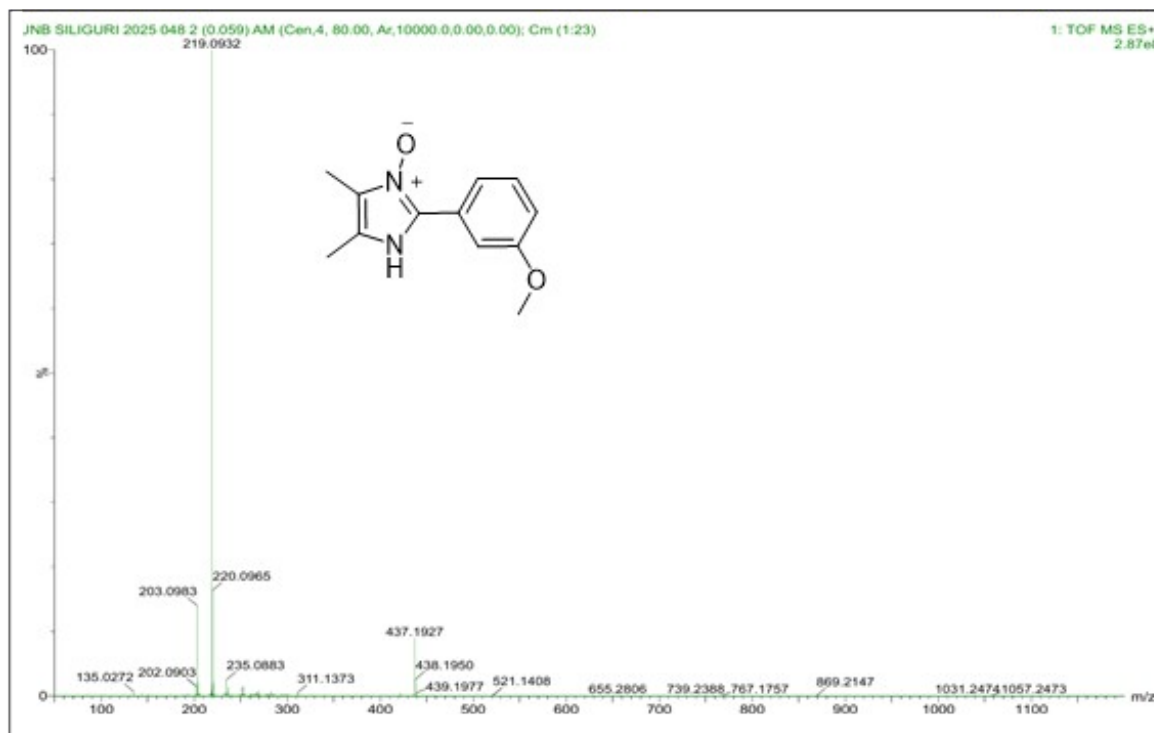

<sup>1</sup>H NMR - 2-(4-N,N-dimethylphenyl)-4,5-dimethyl Imidazole 3-oxide (4ae)

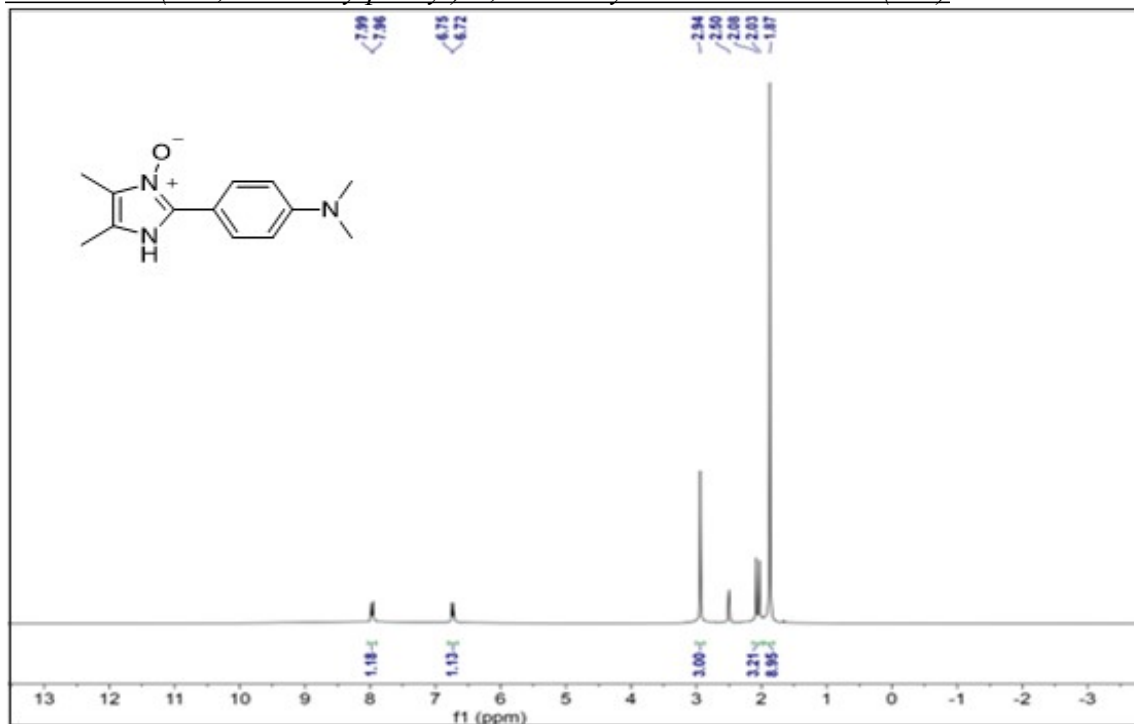

<sup>13</sup>C NMR - 2-(4-N,N-dimethylphenyl)-4,5-dimethyl Imidazole 3-oxide (4ae)

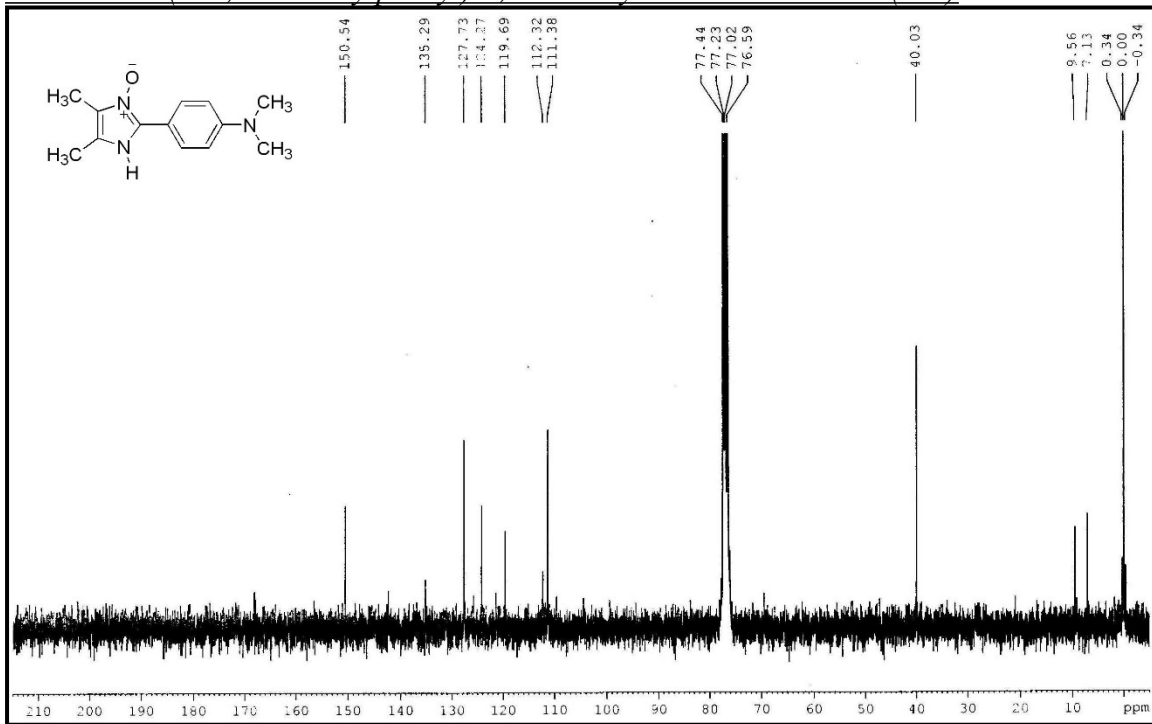

*HRMS - 2-(4-N,N-dimethylphenyl)-4,5-dimethyl Imidazole 3-oxide (4ae)*

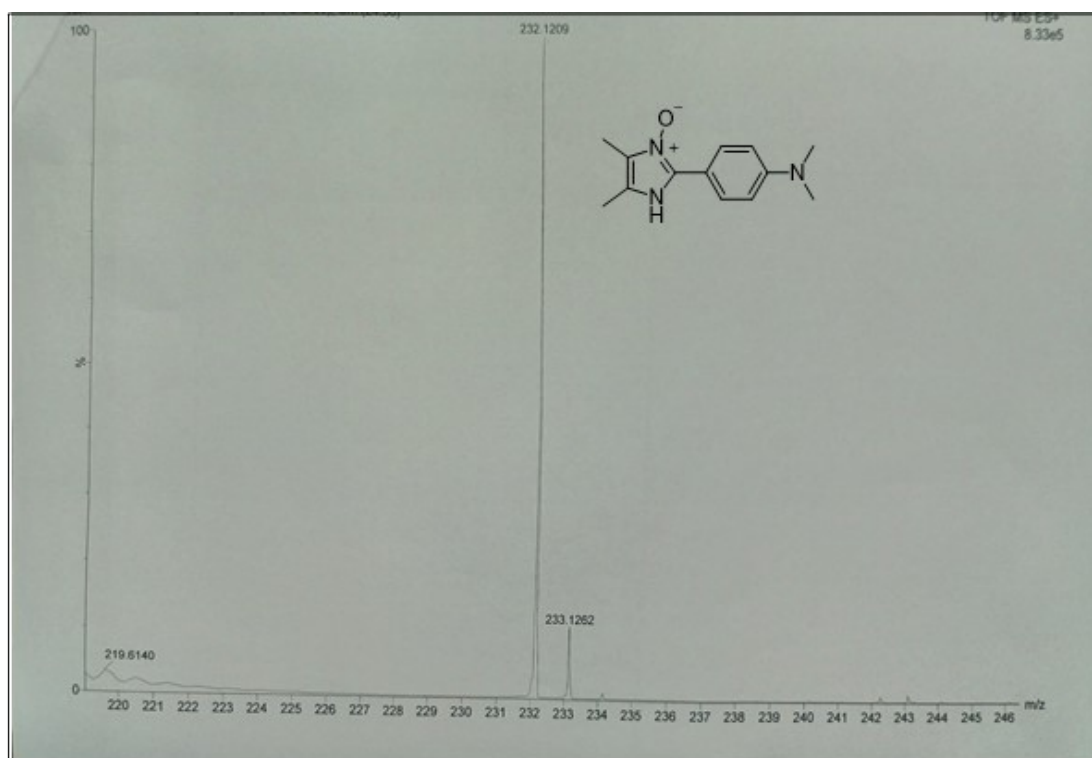

*<sup>1</sup>HNMR - 2-(4-hydroxy phenyl)-4,5-dimethyl Imidazole 3-oxide (4af)*

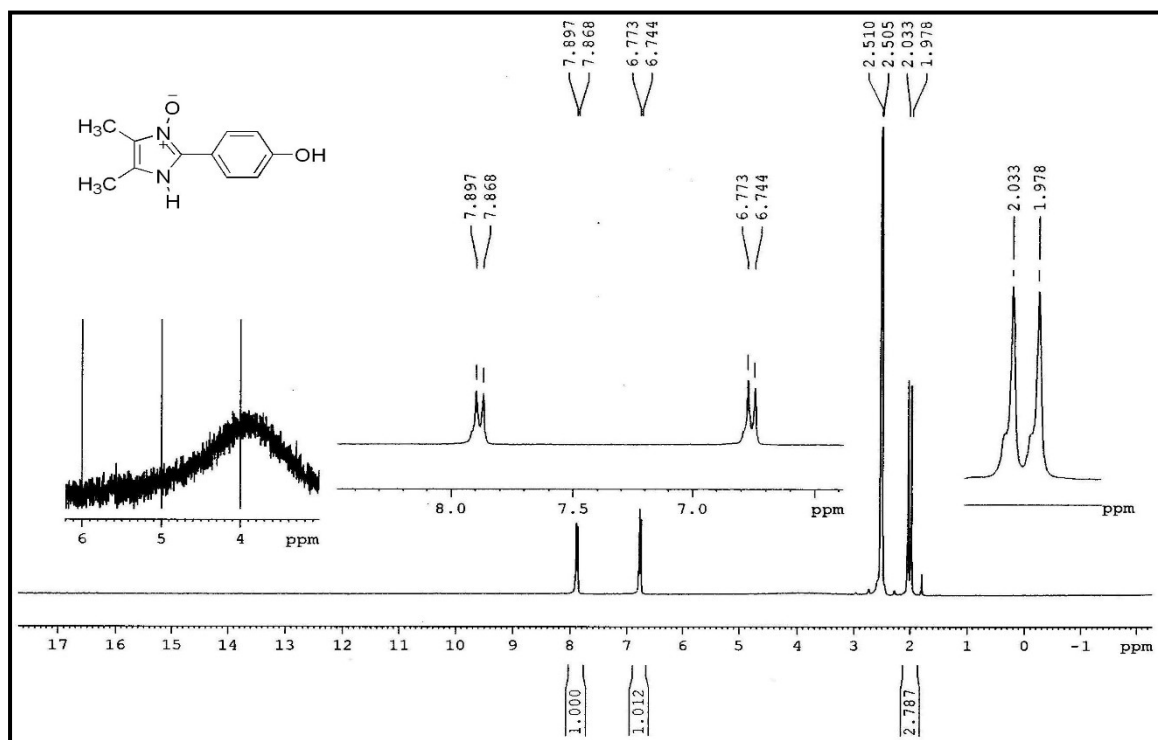

*<sup>13</sup>CNMR - 2-(4-hydroxy phenyl)-4,5-dimethyl Imidazole 3-oxide (4af)*

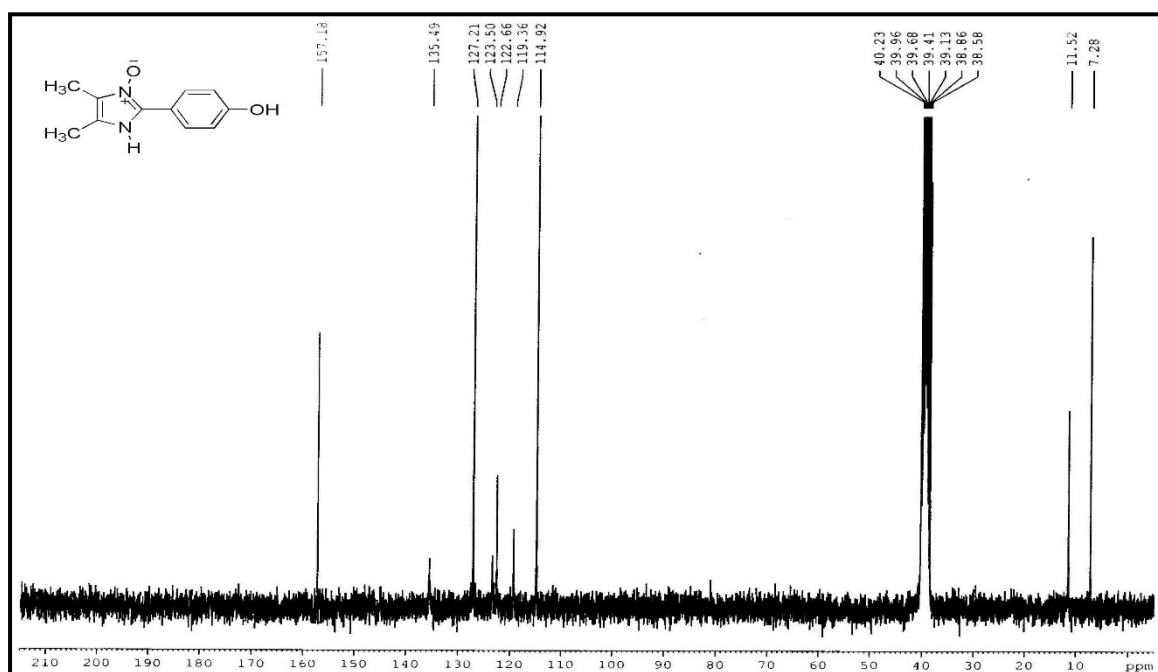

*HRMS - 2-(4-hydroxy phenyl)-4,5-dimethyl Imidazole 3-oxide (4af)*

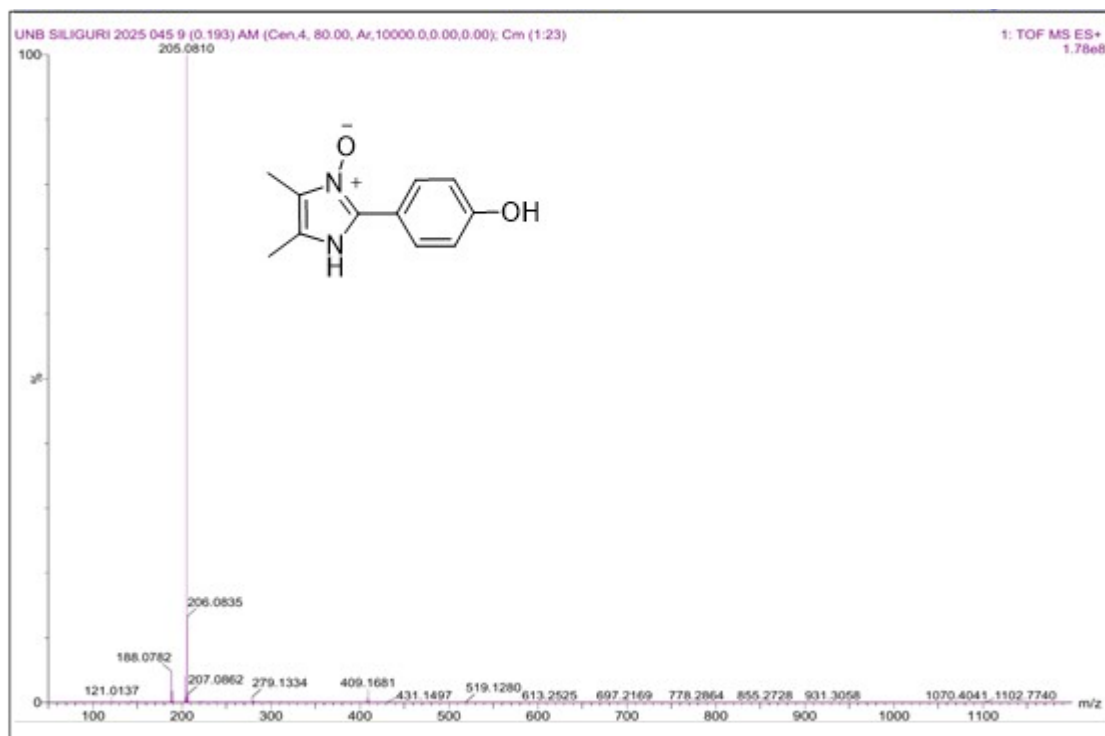

*<sup>1</sup>HNMR - 2-(2-hydroxyphenyl)-4,5-dimethyl Imidazole 3-oxide (4ag)*

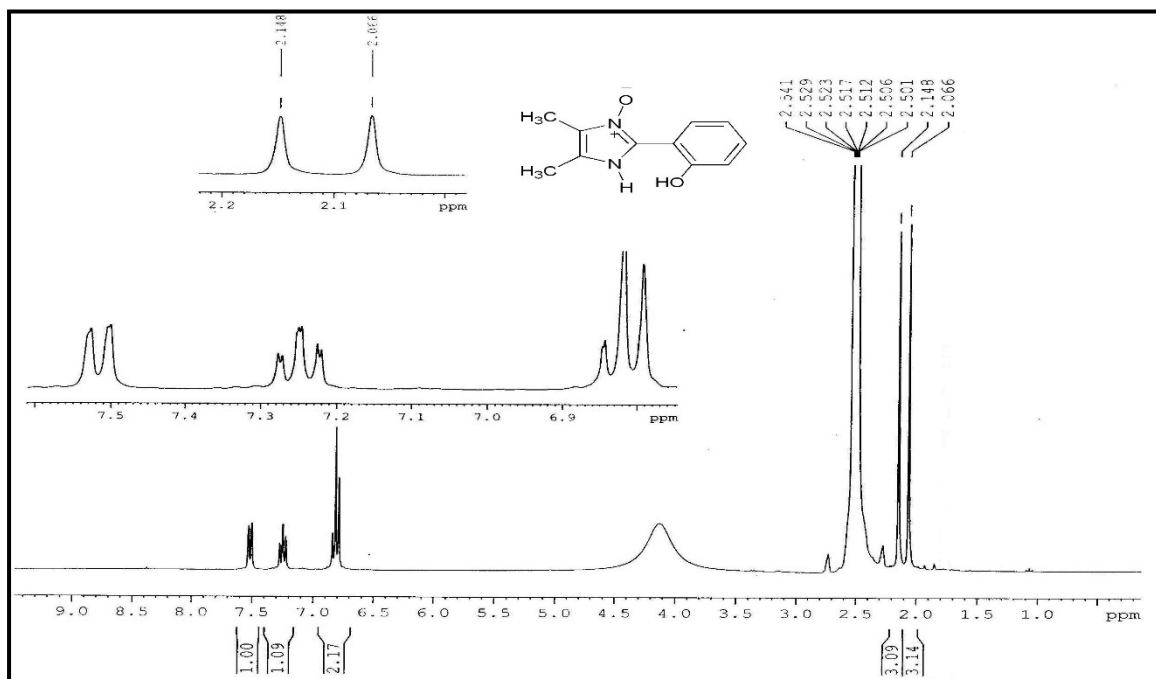

*<sup>13</sup>CNMR - 2-(2-hydroxyphenyl)-4,5-dimethyl Imidazole 3-oxide (4ag)*

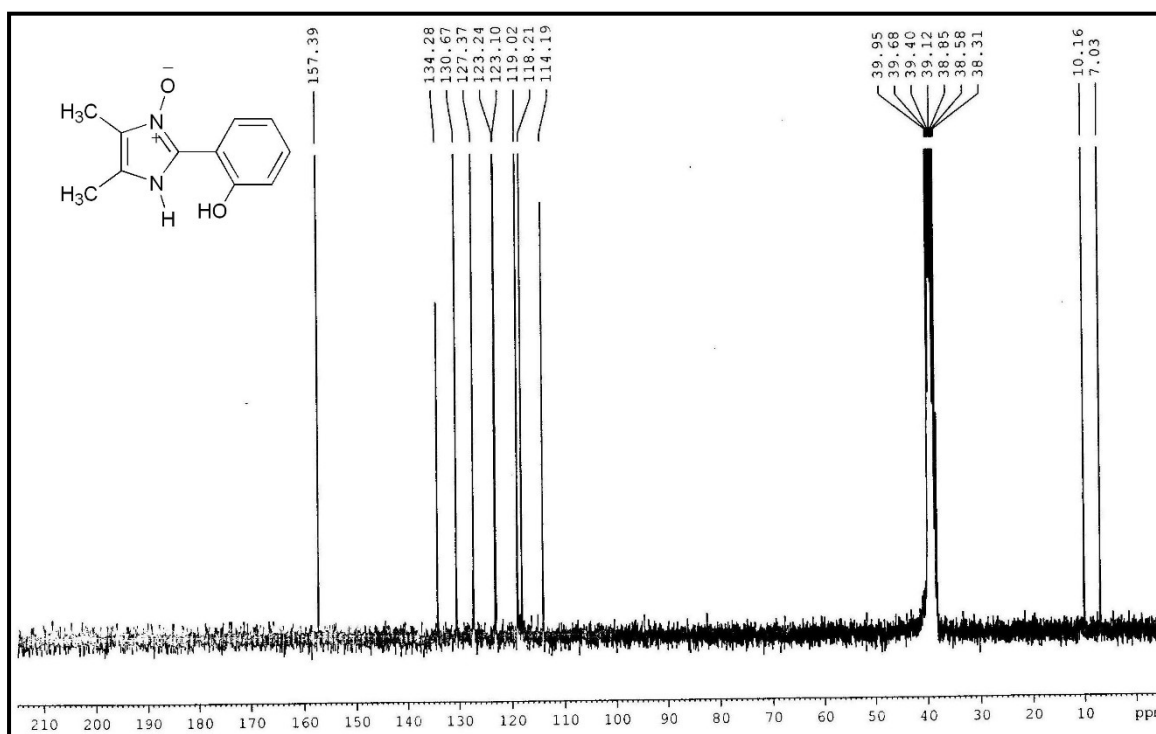

*HRMS - 2-(2-hydroxyphenyl)-4,5-dimethyl Imidazole 3-oxide (4ag)*

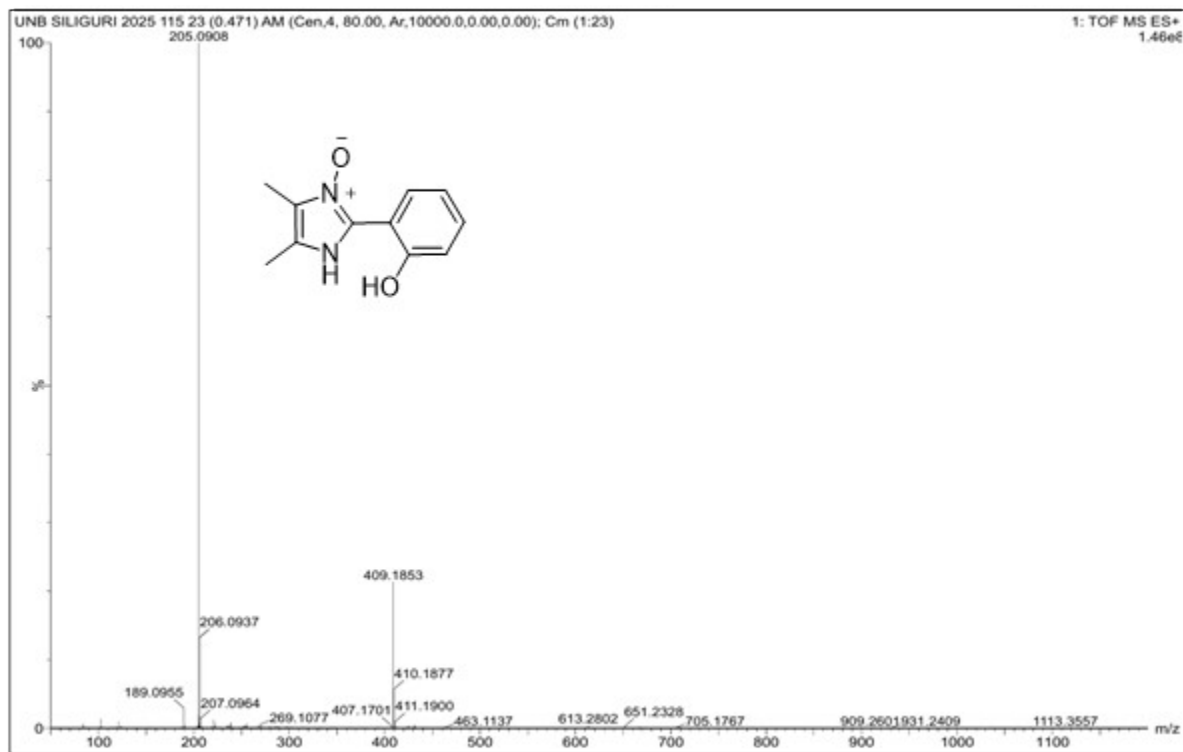

*<sup>1</sup>HNMR - 2-(4-hydroxy-3-methoxyphenyl)-4,5-dimethyl Imidazole 3-oxide (4ah)*

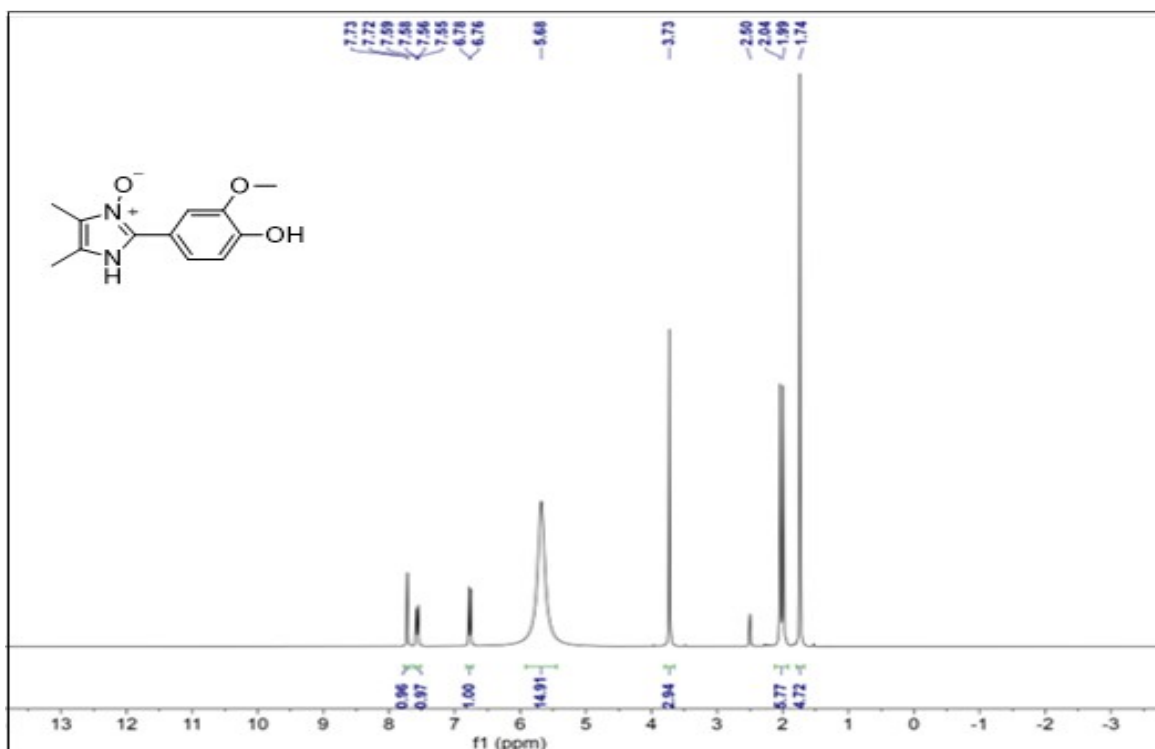

*<sup>13</sup>CNMR - 2-(4-hydroxy-3-methoxyphenyl)-4,5-dimethyl Imidazole 3-oxide (4ah)*

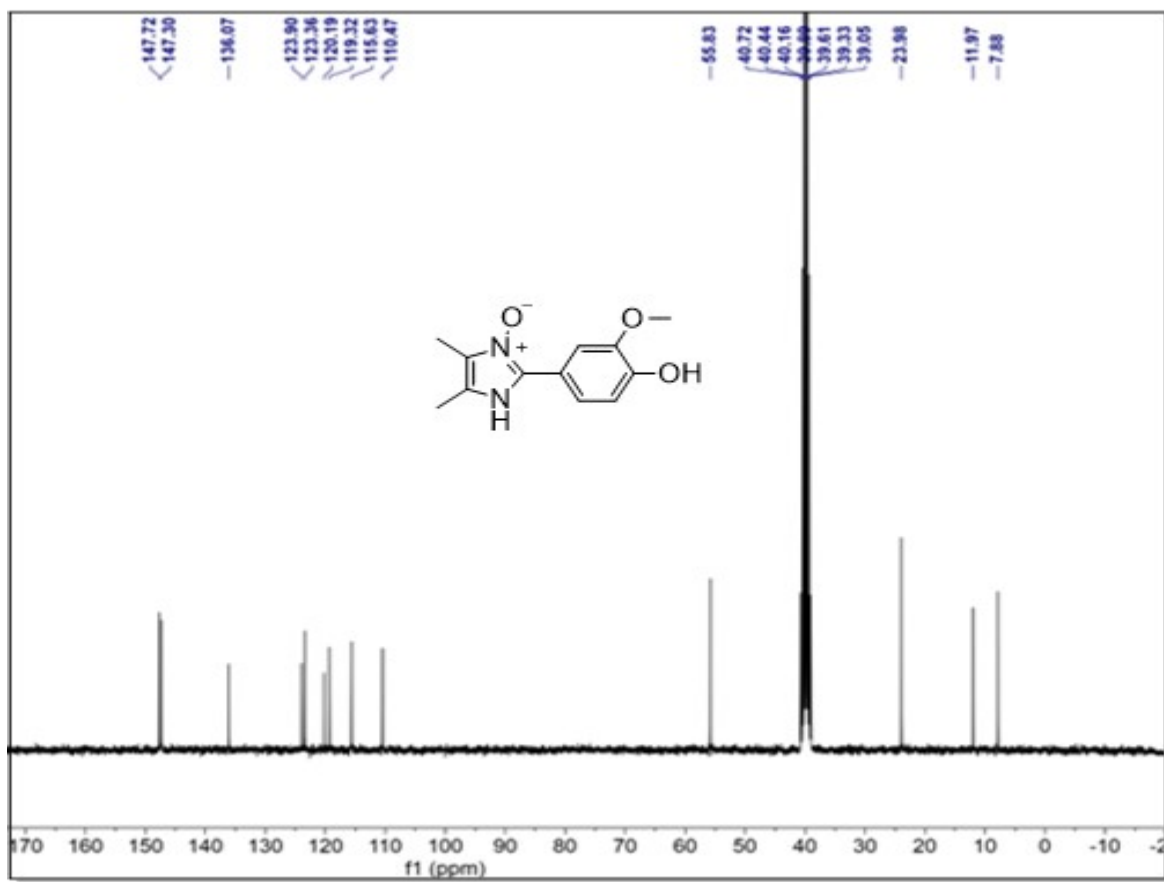

*HRMS - 2-(4-hydroxy-3-methoxyphenyl)-4,5-dimethyl Imidazole 3-oxide (4ah)*

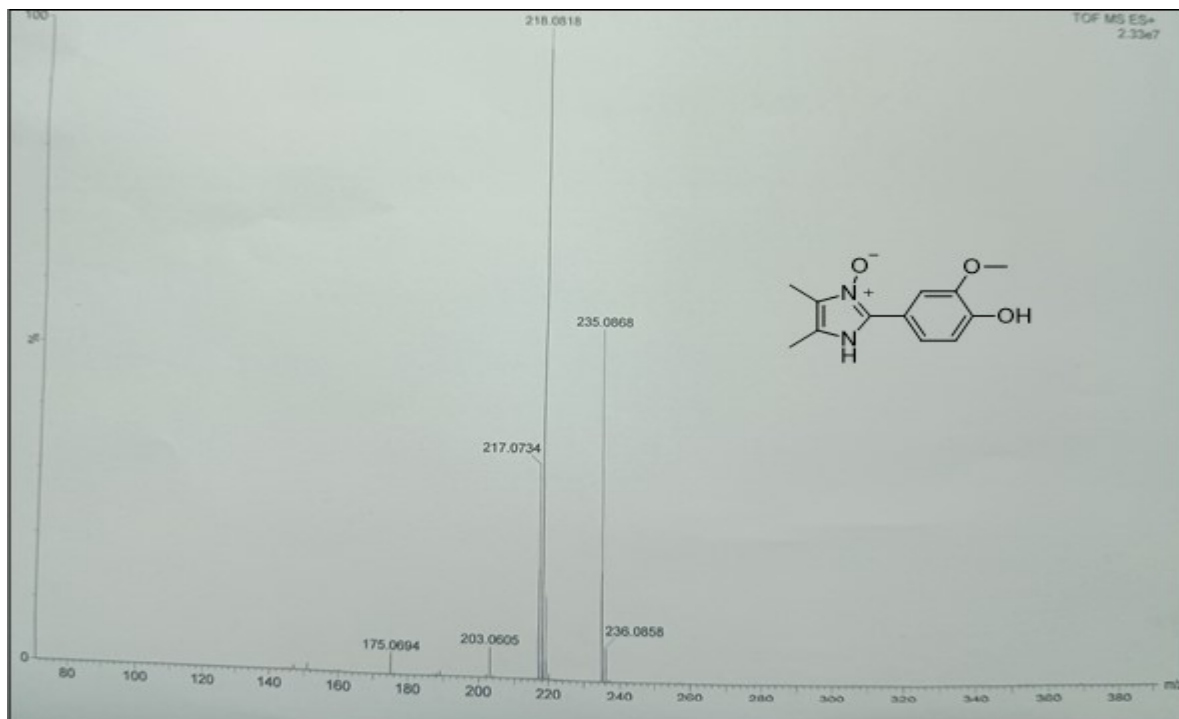

*<sup>1</sup>HNMR - 2-(2-furyl)-4,5-dimethyl Imidazole 3-oxide (4ai)*

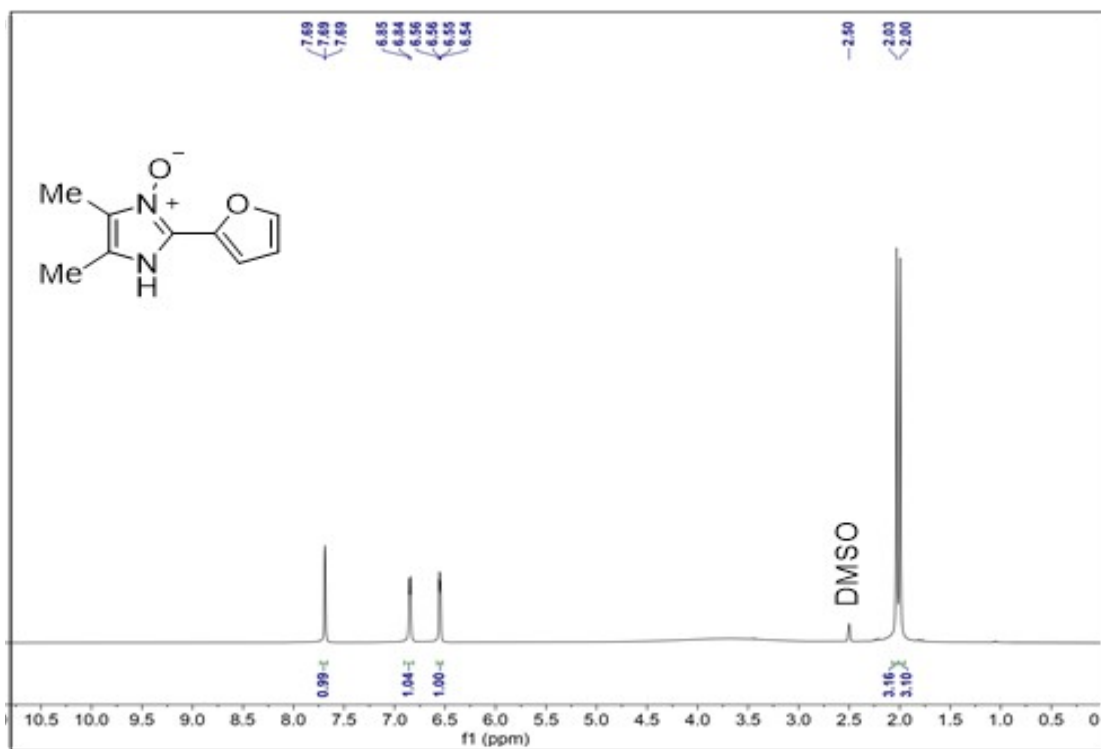

*<sup>13</sup>CNMR - 2-(2-furyl)-4,5-dimethyl Imidazole 3-oxide (4ai)*

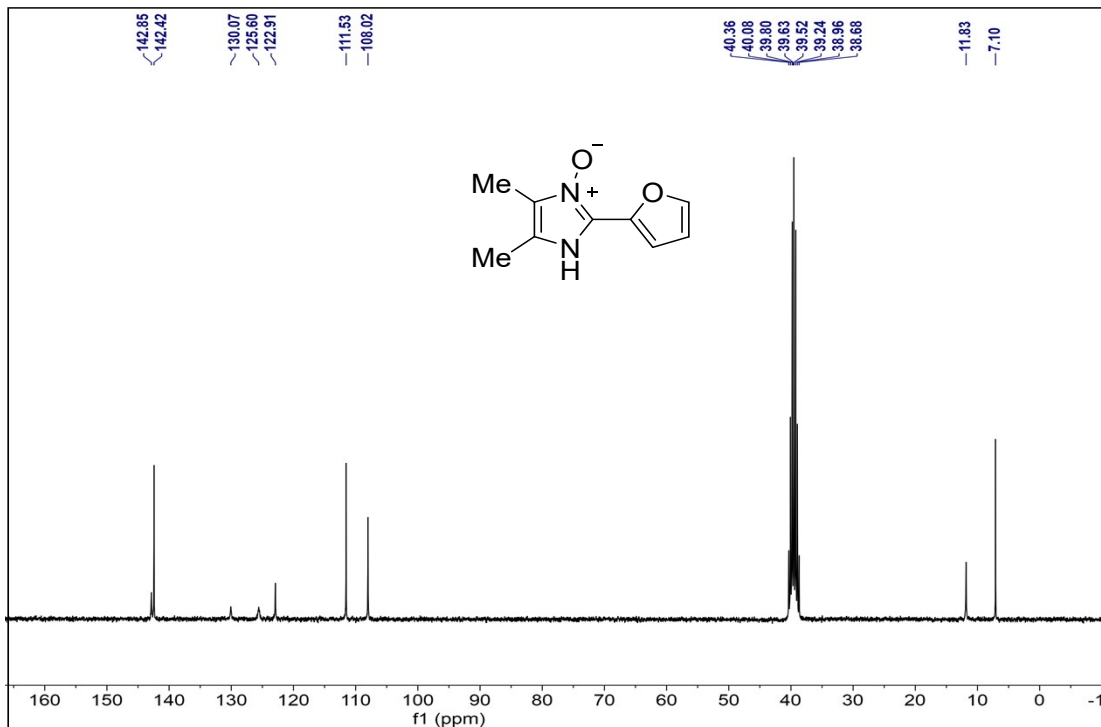

*HRMS - 2-(2-furyl)-4,5-dimethyl Imidazole 3-oxide (4ai)*

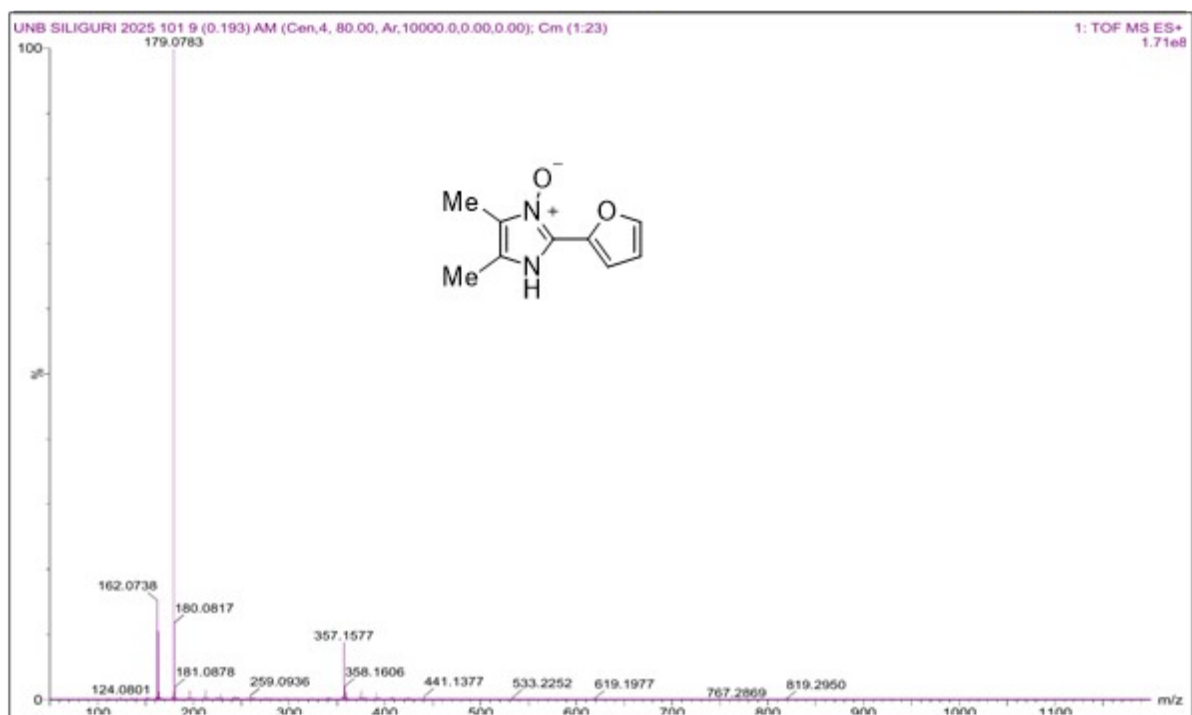

*<sup>1</sup>HNMR - n-butyl-2-(4-hydroxyphenyl)-4,5-dimethyl Imidazole 3-oxide (4aj)*

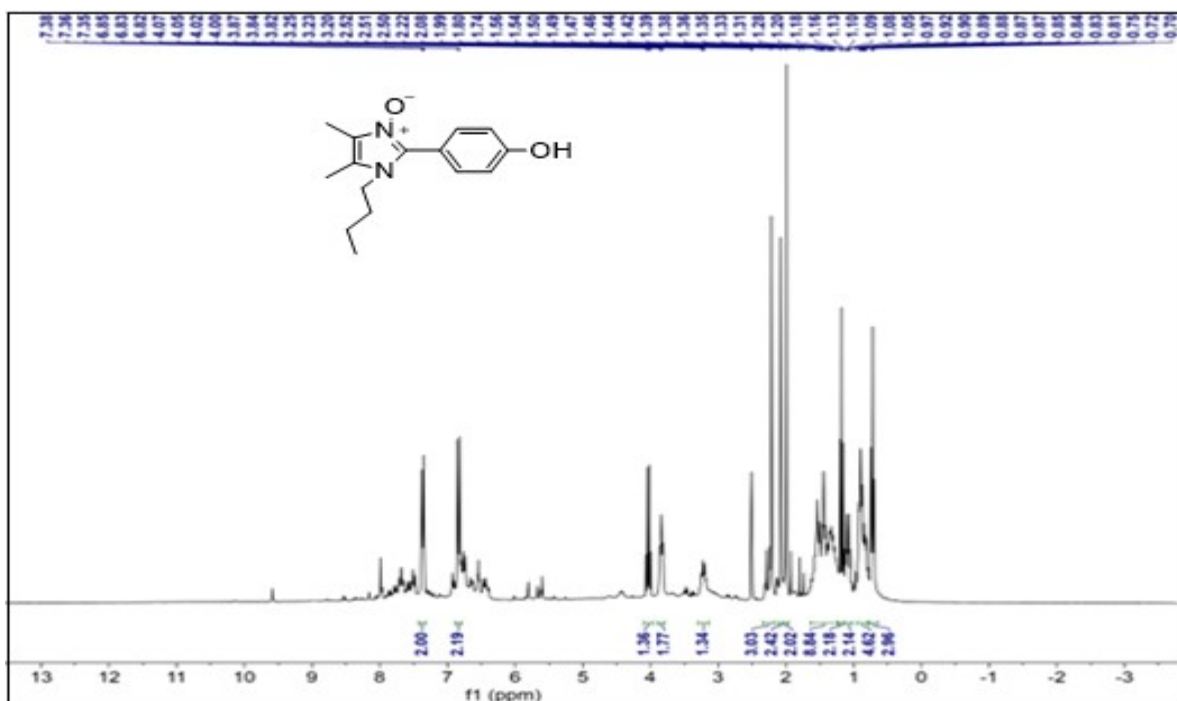

<sup>13</sup>CNMR - *n*-butyl-2-(4-hydroxyphenyl)-4,5-dimethyl Imidazole 3-oxide (4aj)

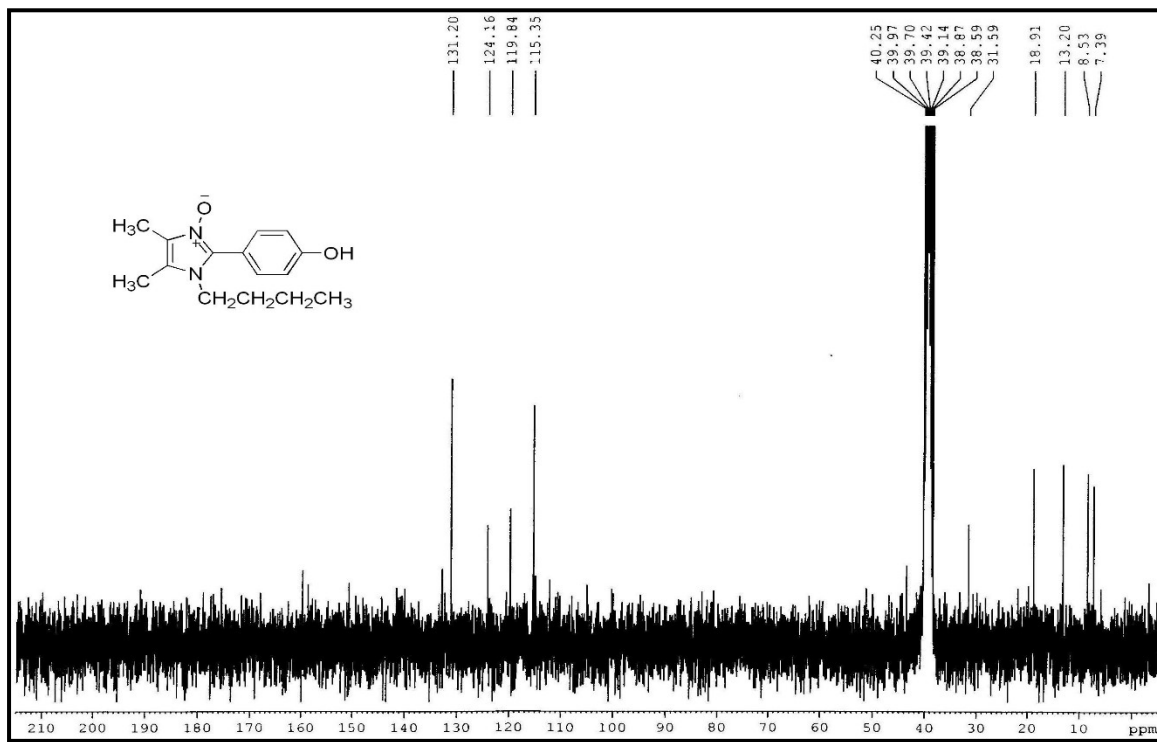

<sup>1</sup>H NMR - *n*-naphthyl-2-(4-hydroxyphenyl)-4,5-dimethyl Imidazole 3-oxide (4ak)

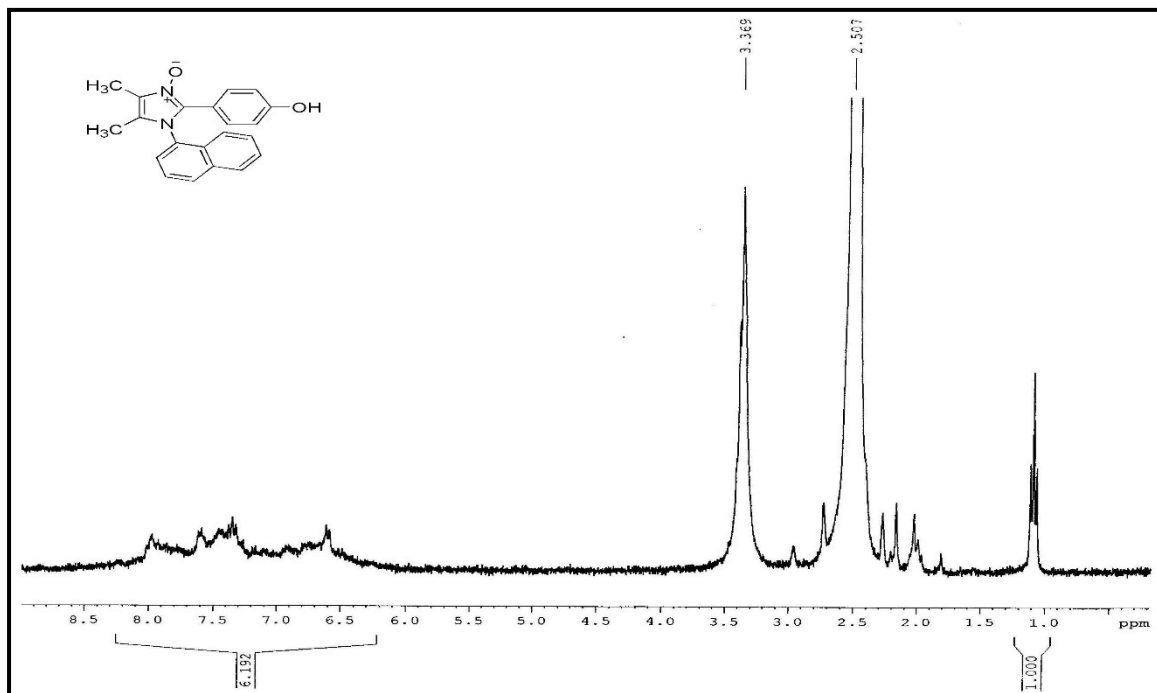

*<sup>1</sup>H*NMR - 1-(4-carboxyphenyl)-2-(4-hydroxyphenyl)-4,5-dimethyl-1H-imidazole 3-oxide  
(4am)

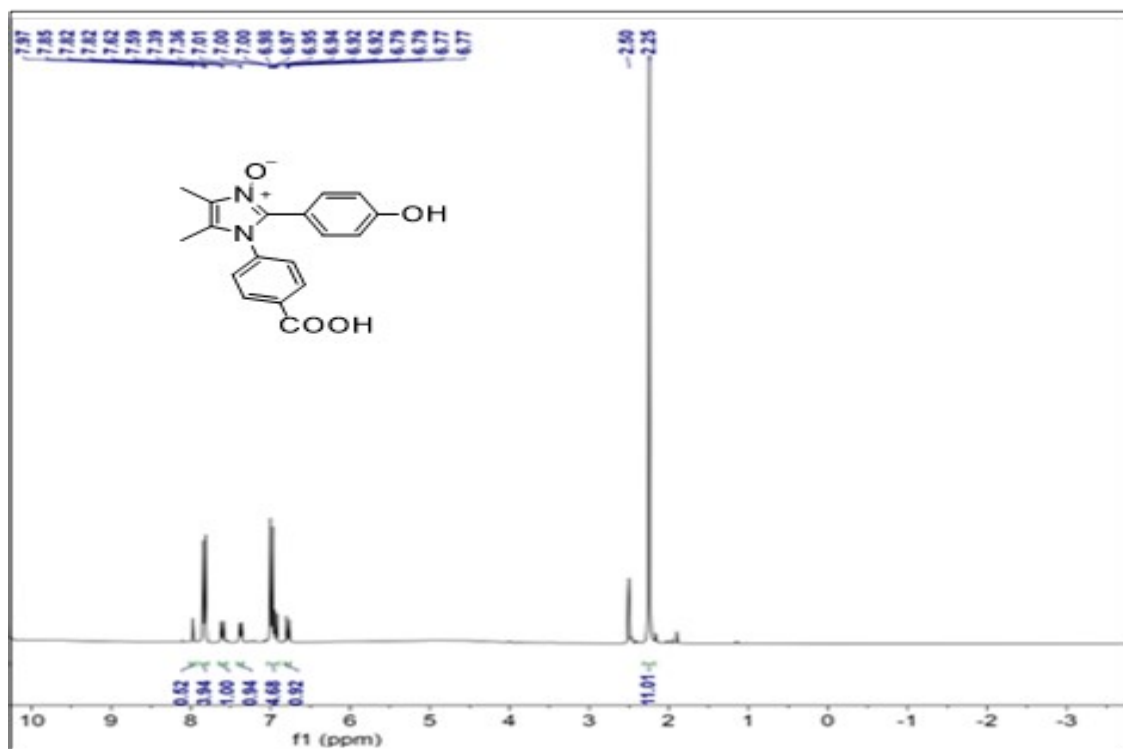

*<sup>13</sup>C*NMR - 1-(4-carboxyphenyl)-2-(4-hydroxyphenyl)-4,5-dimethyl-1H-imidazole 3-oxide  
(4am)

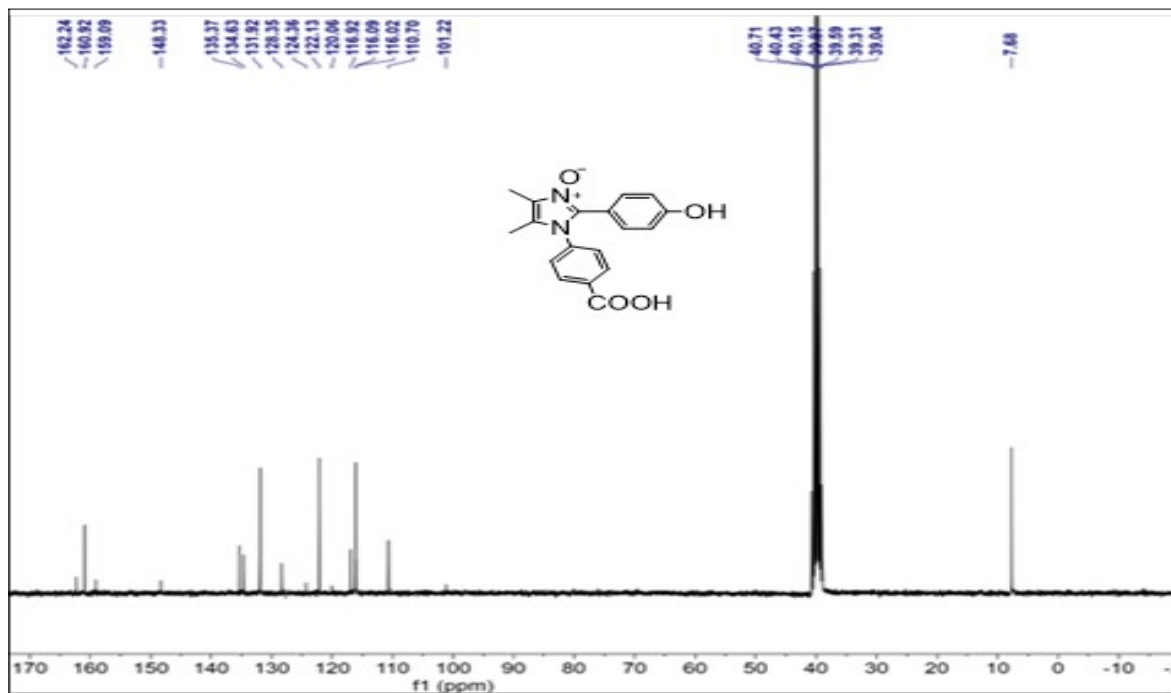

*HRMS -1-(4-carboxyphenyl)-2-(4-hydroxyphenyl)-4,5-dimethyl-1H-imidazole 3-oxide (4am)*

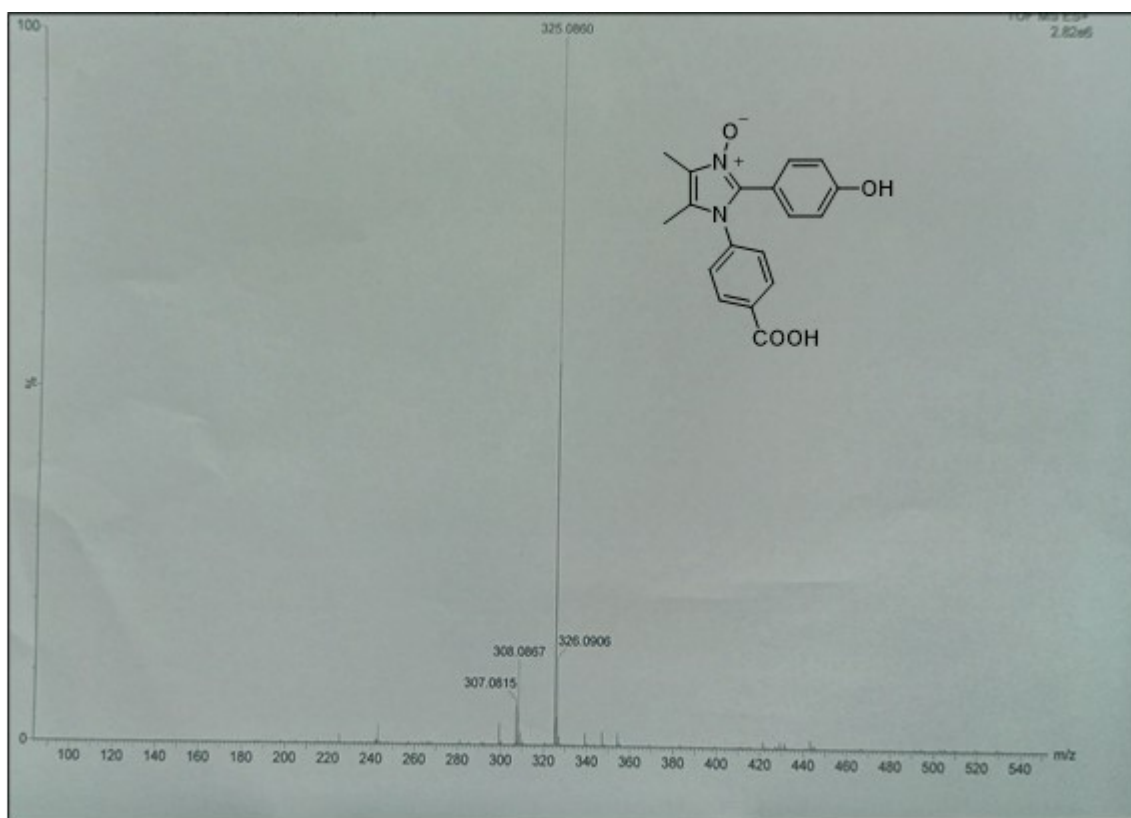

*<sup>1</sup>HNMR - N-(4-methoxyphenyl)-2-(4-hydroxyphenyl)-4,5-dimethyl Imidazole 3-oxide (4an)*

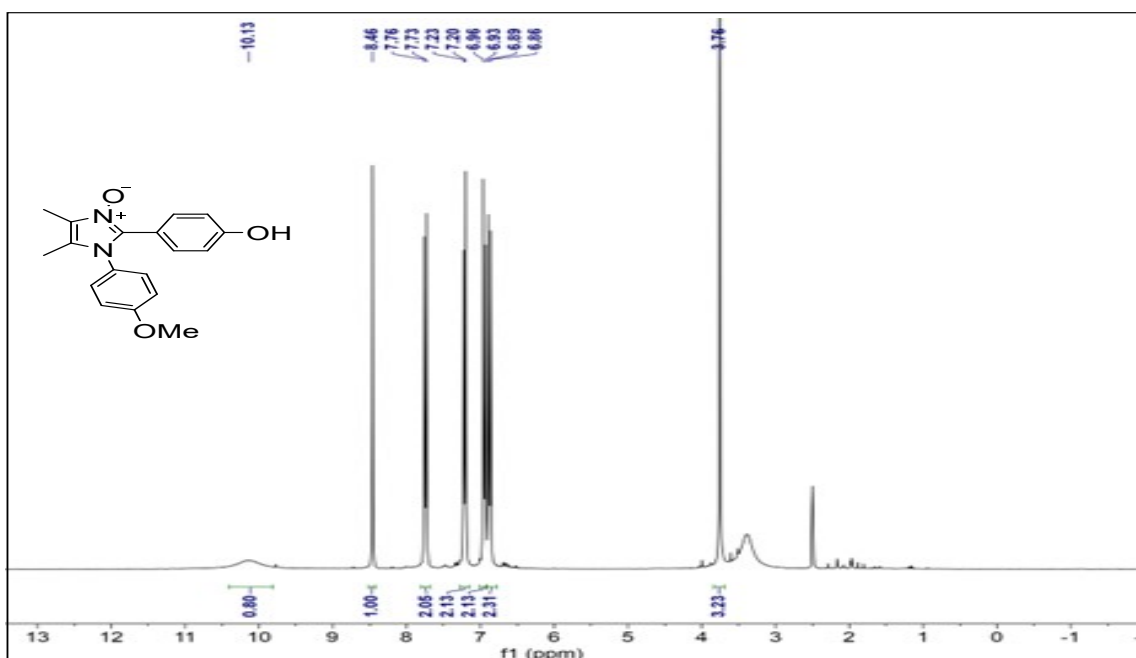

*<sup>13</sup>CNMR - N-(4-methoxyphenyl)-2-(4-hydroxyphenyl)-4,5-dimethyl Imidazole 3-oxide (4an)*

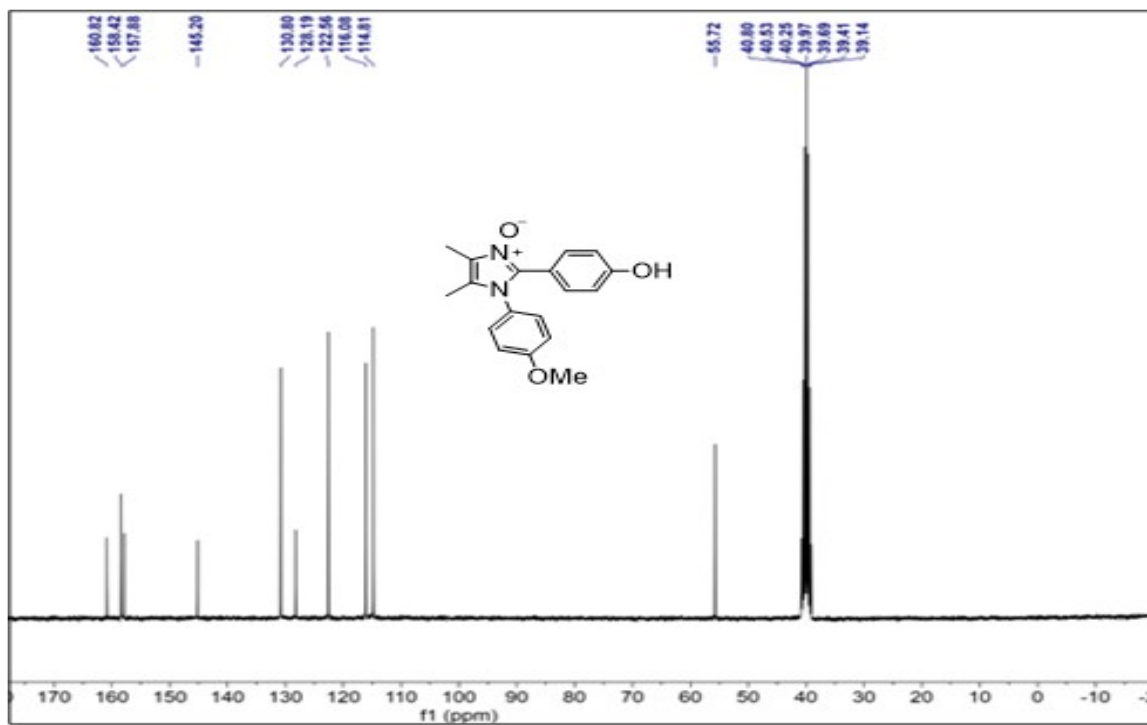

*HRMS - N-(4-methoxyphenyl)-2-(4-hydroxyphenyl)-4,5-dimethyl Imidazole 3-oxide (4an)*

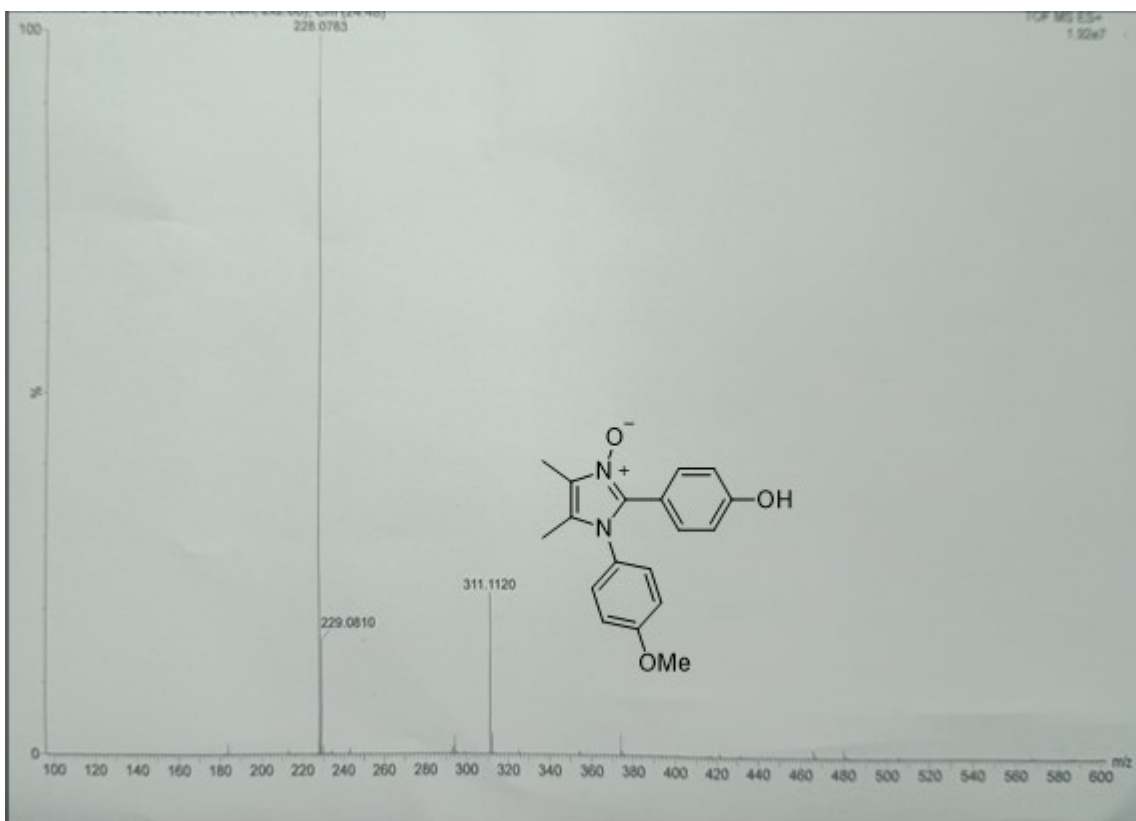

*<sup>1</sup>HNMR - 1-hydroxy-2-(4-hydroxyphenyl)-4,5-dimethyl Imidazole 3-oxide (4ao)*

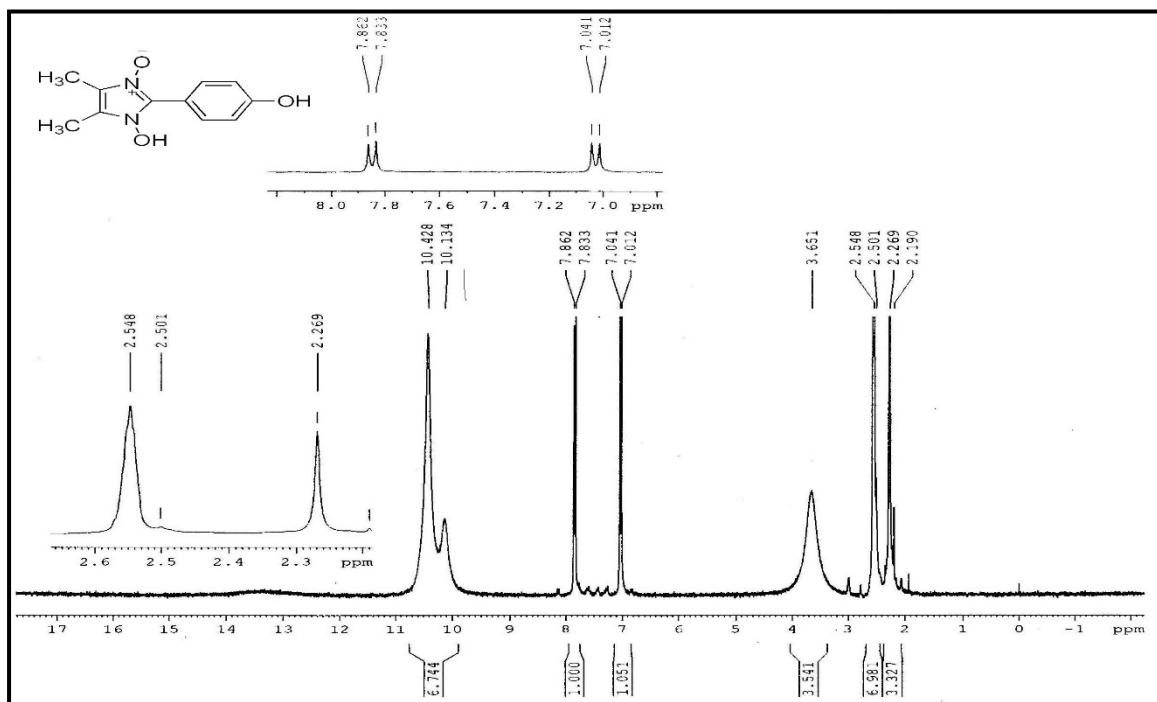

*<sup>13</sup>CNMR - 1-hydroxy-2-(4-hydroxyphenyl)-4,5-dimethyl Imidazole 3-oxide (4ao)*

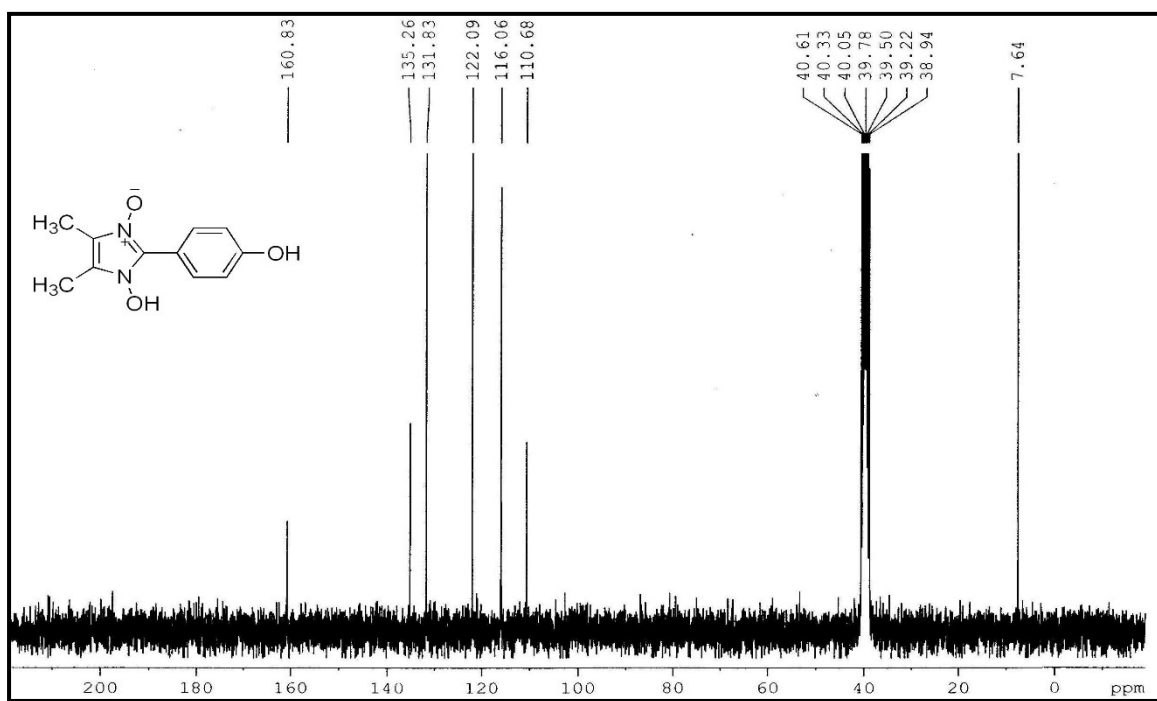

*<sup>1</sup>HNMR - 1-hydroxy-2-(4-methoxyphenyl)-4,5-dimethyl Imidazole 3-oxide (4ap)*

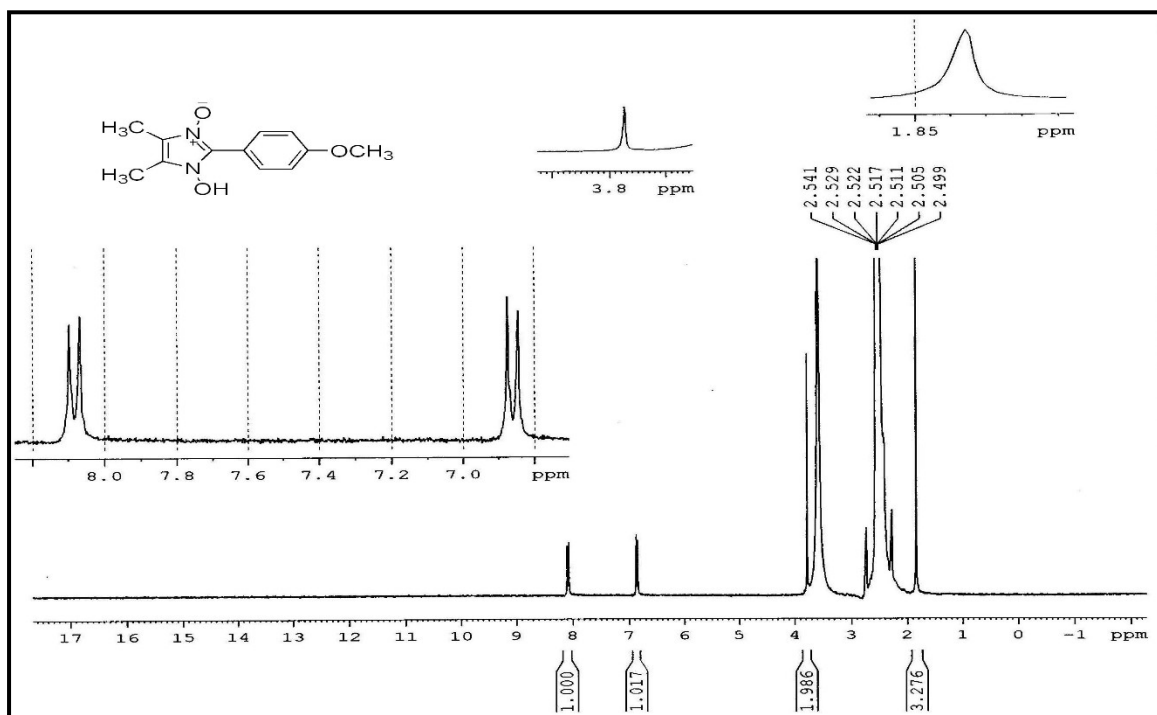

*<sup>13</sup>CNMR - 1-hydroxy-2-(4-methoxyphenyl)-4,5-dimethyl Imidazole 3-oxide (4ap)*

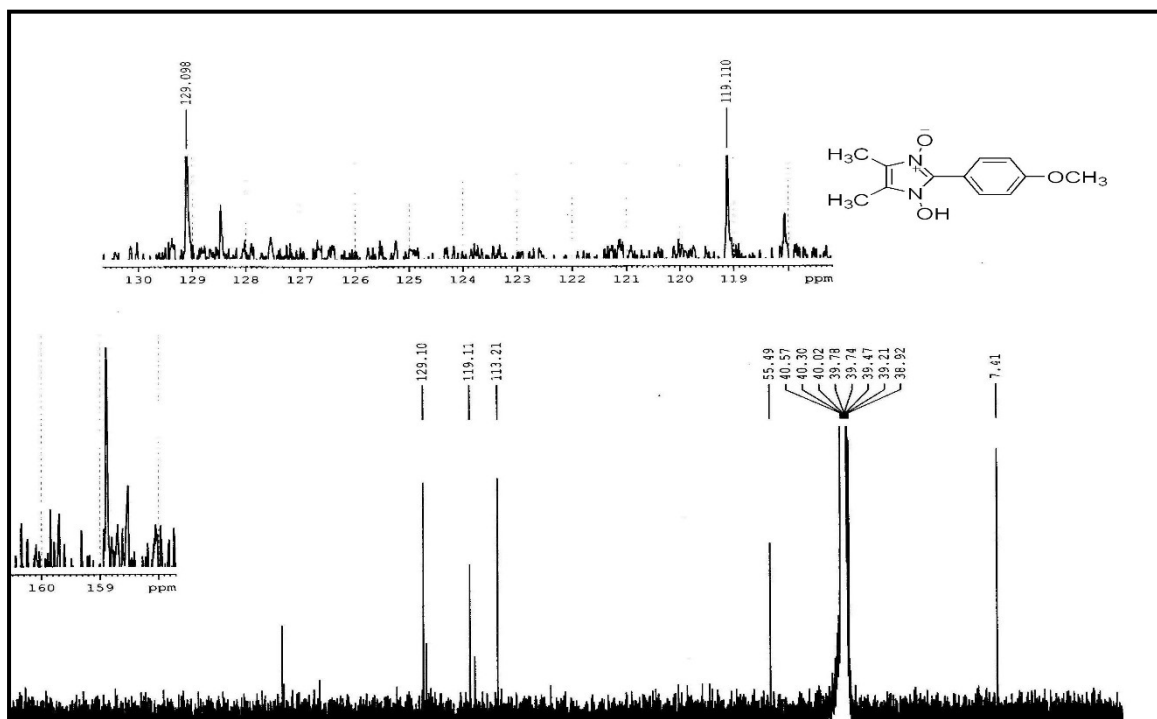

*HRMS - 1-hydroxy-2-(4-methoxyphenyl)-4,5-dimethyl Imidazole 3-oxide (4ap)*

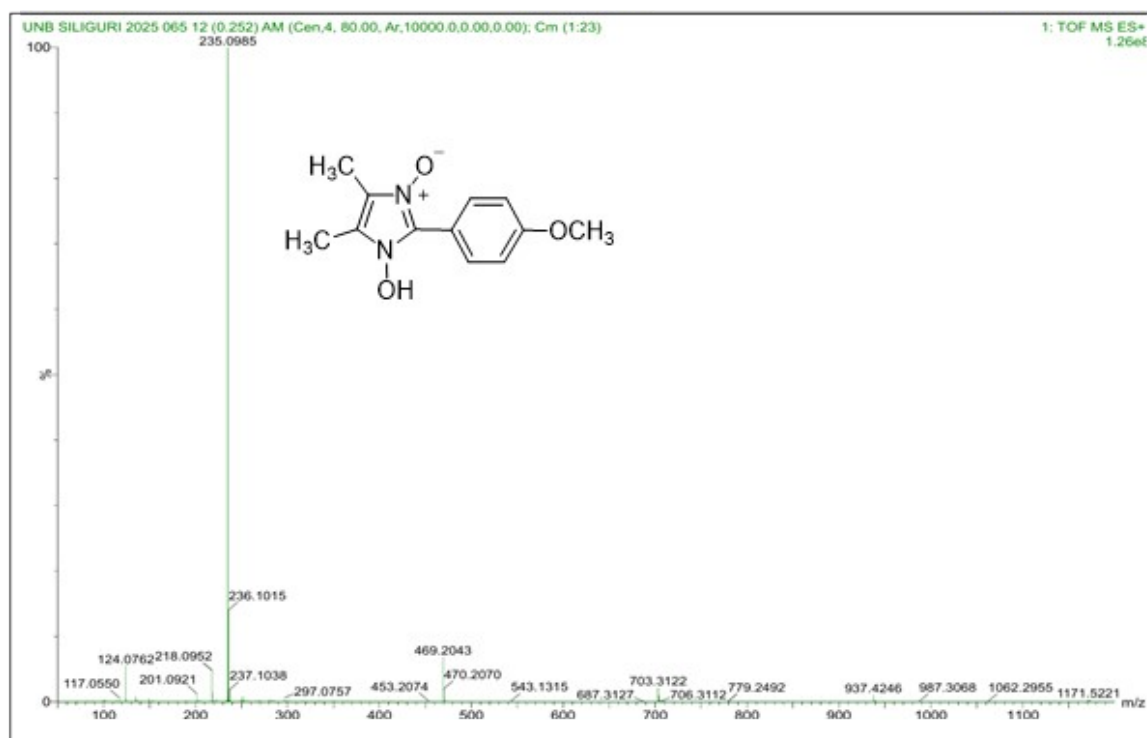

*<sup>1</sup>HNMR - 1-hydroxy-2-(3-nitrophenyl)-4,5-dimethyl Imidazole 3-oxide (4aq)*

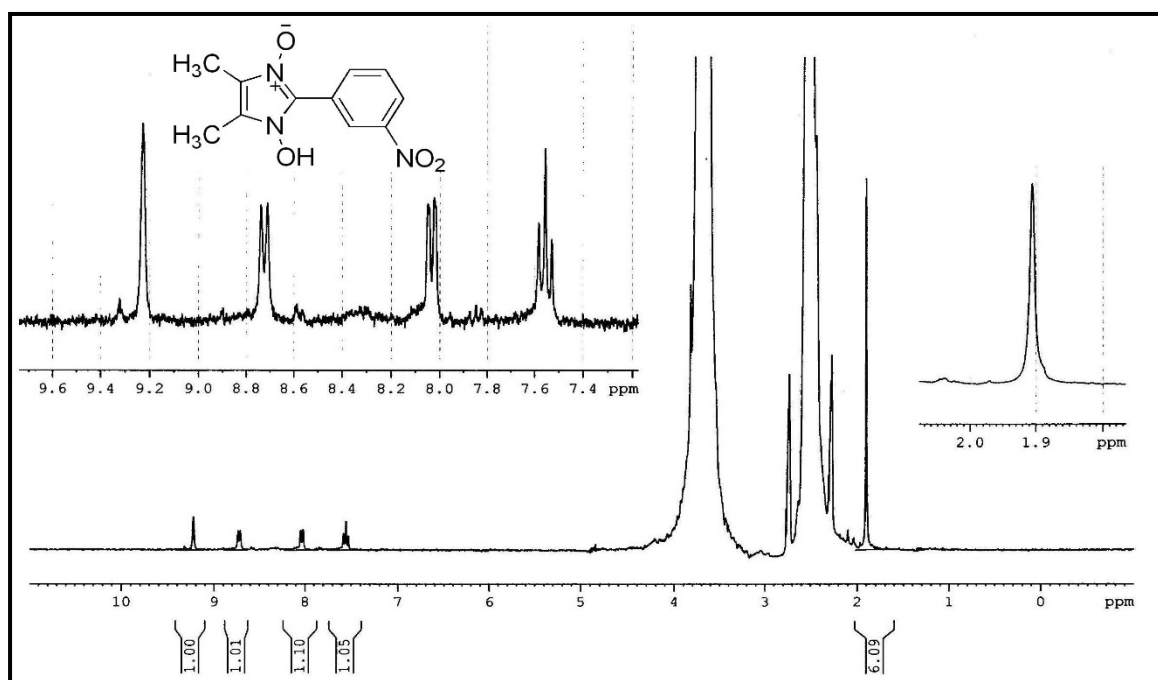

*<sup>13</sup>CNMR - 1-hydroxy-2-(3-nitrophenyl)-4,5-dimethyl Imidazole 3-oxide (4aq)*

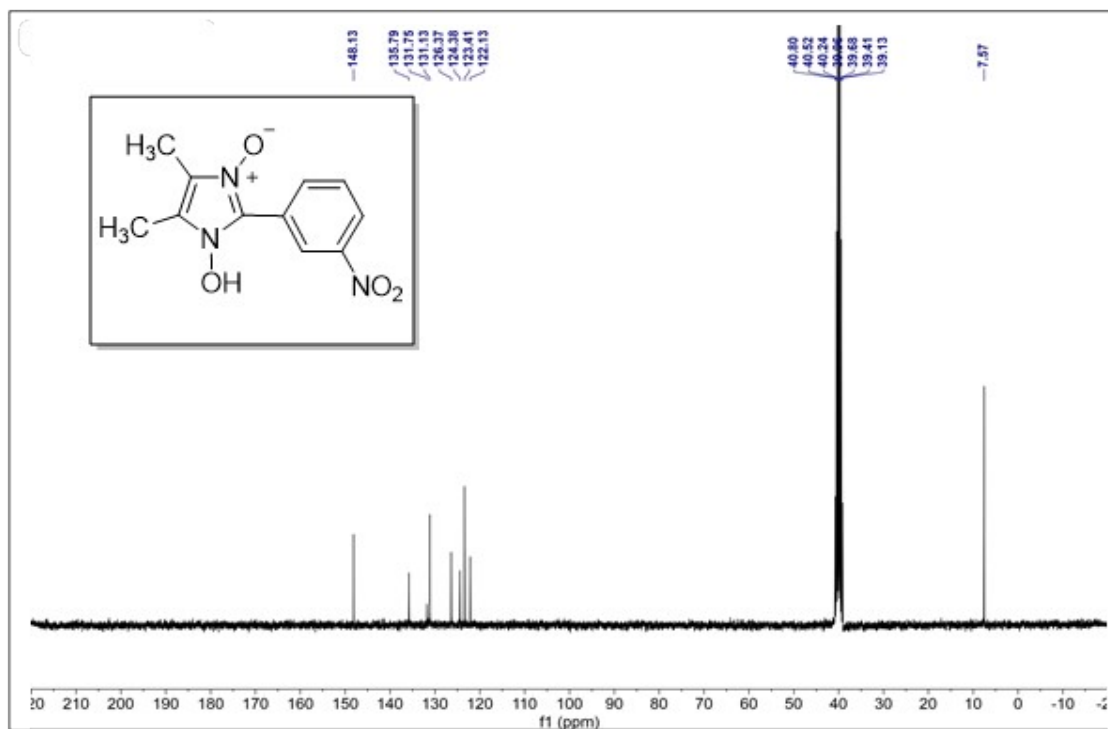

*HRMS - 1-hydroxy-2-(3-nitrophenyl)-4,5-dimethyl Imidazole 3-oxide (4aq)*

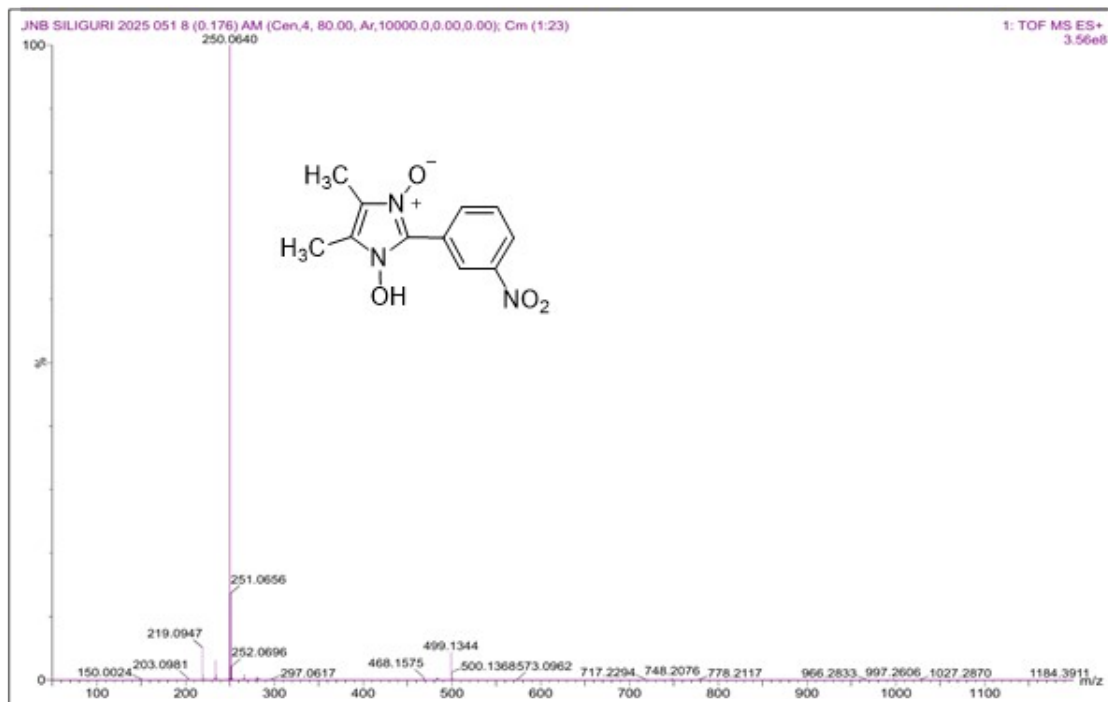

*<sup>1</sup>HNMR - 1-hydroxy-2-(4-hydroxy-3-methoxyphenyl)-4,5-dimethyl Imidazole 3-oxide (4ar)*

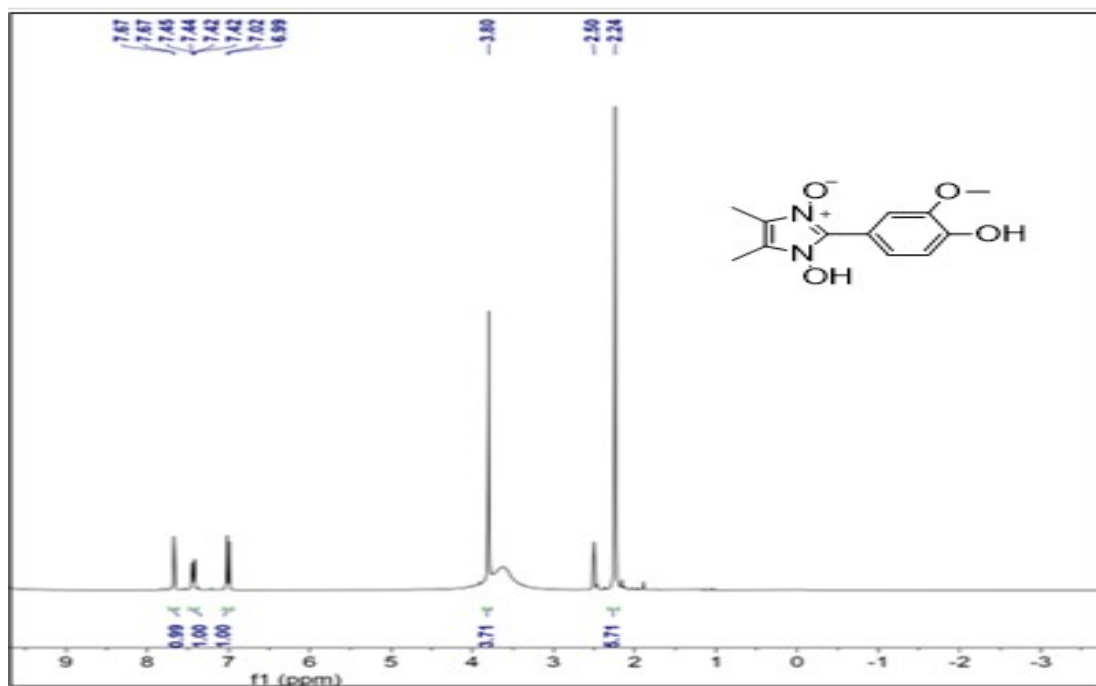

*<sup>13</sup>CNMR - 1-hydroxy-2-(4-hydroxy-3-methoxyphenyl)-4,5-dimethyl Imidazole 3-oxide (4ar)*

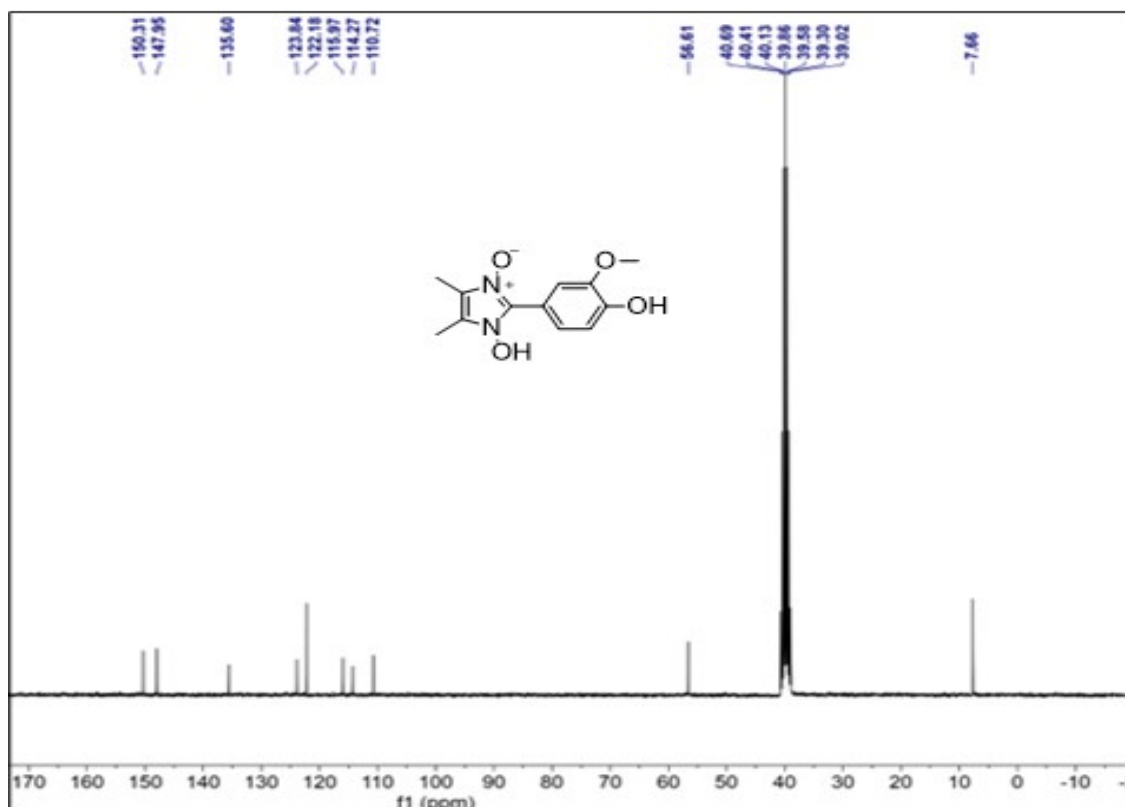

*HRMS - 1-hydroxy-2-(4-hydroxy-3-methoxyphenyl)-4,5-dimethyl Imidazole 3-oxide (4ar)*

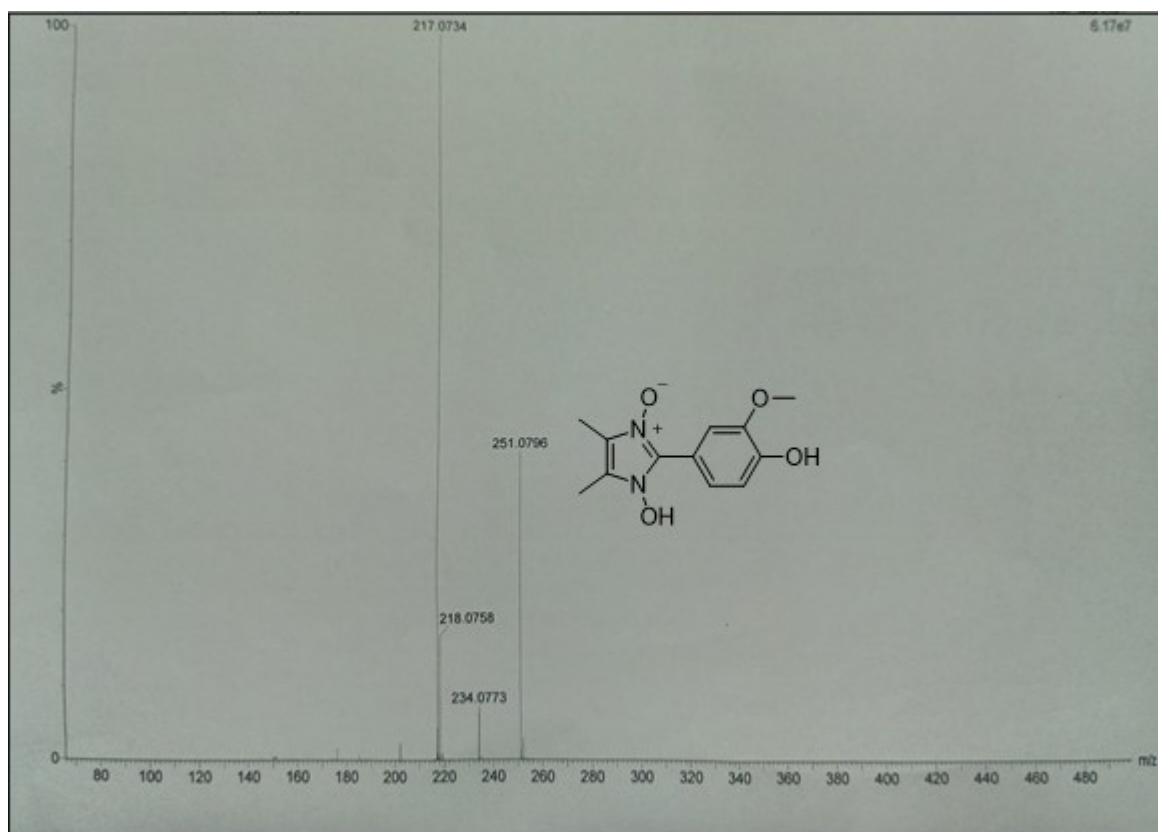

*<sup>1</sup>HNMR - 1-hydroxy-2-(2-pyridyl)-4,5-dimethyl Imidazole 3-oxide (4as)*

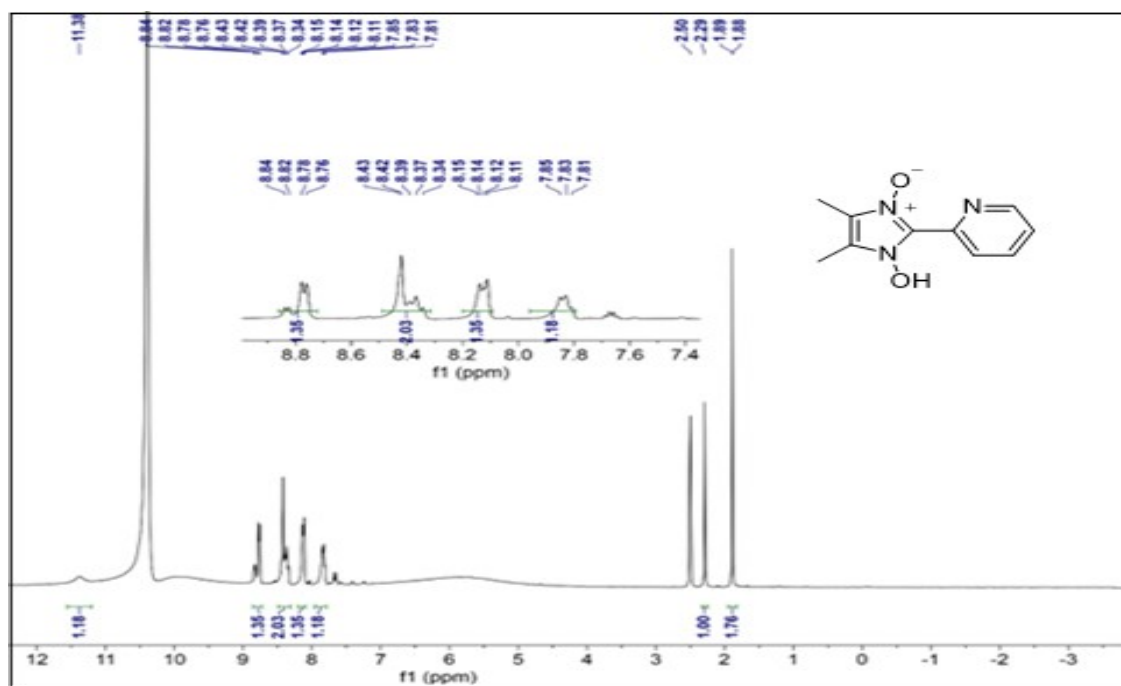

*<sup>13</sup>CNMR - 1-hydroxy-2-(2-pyridyl)-4,5-dimethyl Imidazole 3-oxide (4as)*

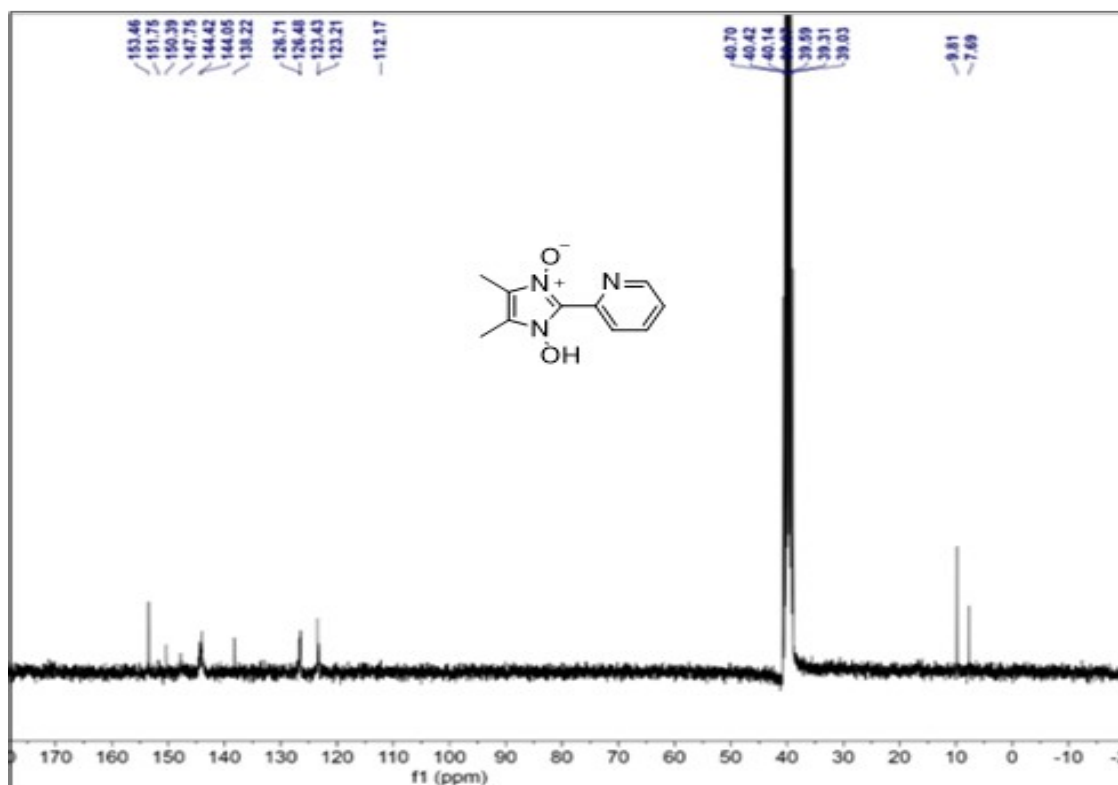

*HRMS - 1-hydroxy-2-(2-pyridyl)-4,5-dimethyl Imidazole 3-oxide (4as)*

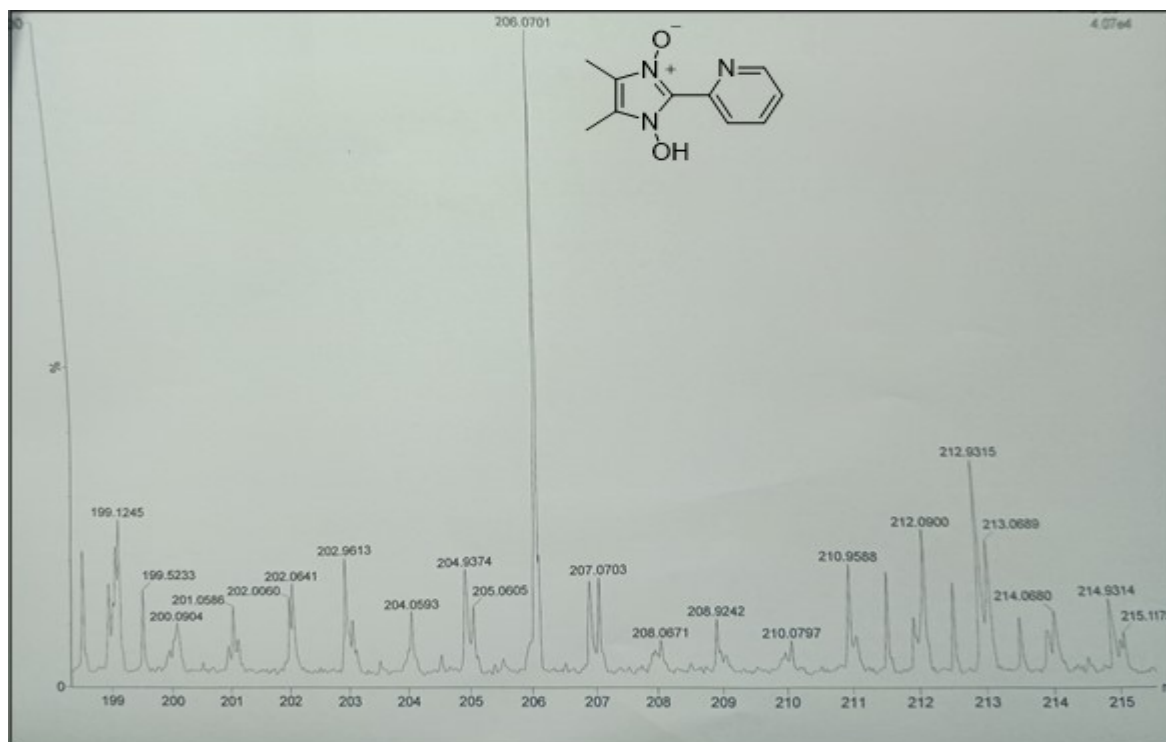

*<sup>1</sup>HNMR - 2-(4-chlorophenyl)-4,5-dimethyl-1H-imidazole 3-oxide (4at)*

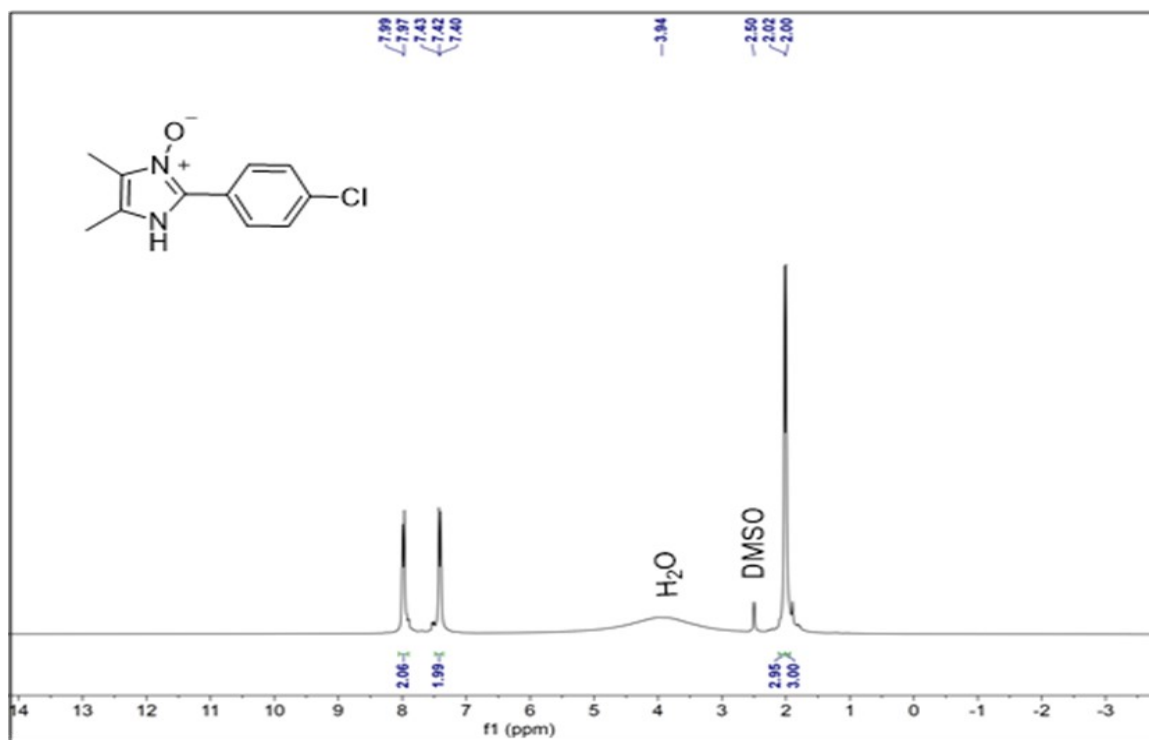

*<sup>13</sup>CNMR - 2-(4-chlorophenyl)-4,5-dimethyl-1H-imidazole 3-oxide (4at)*

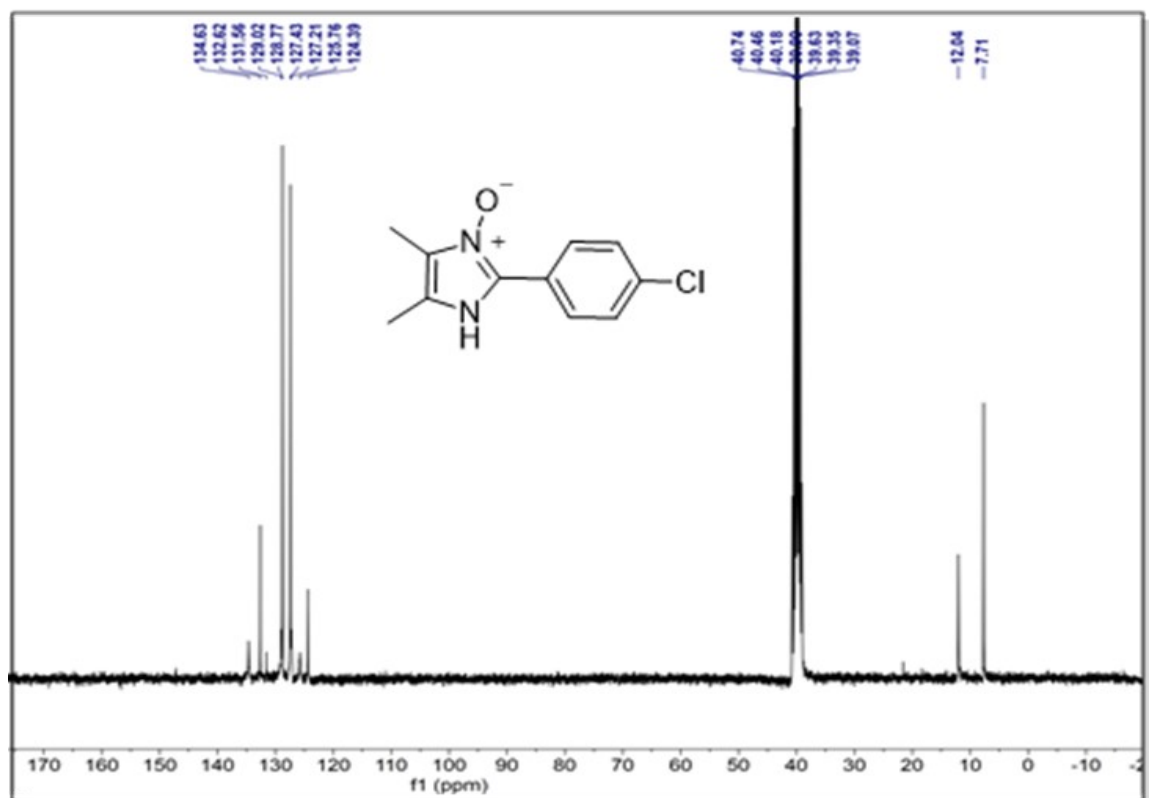

*HRMS - 2-(4-chlorophenyl)-4,5-dimethyl-1H-imidazole 3-oxide (4at)*

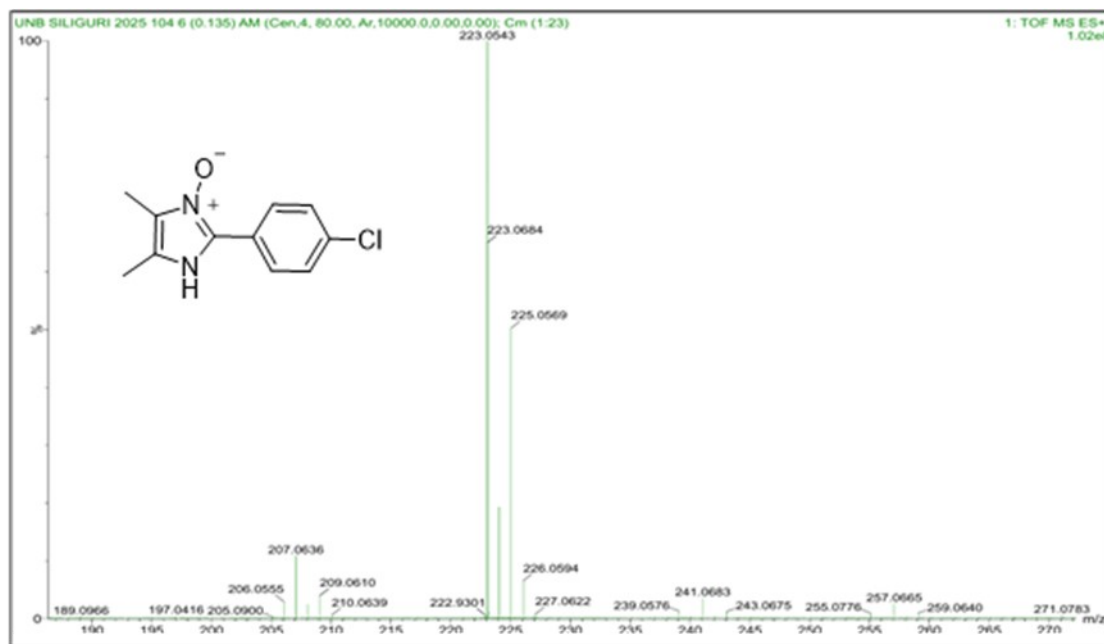

*<sup>1</sup>HNMR - 2-(2-chlorophenyl)-1-hydroxy-4,5-dimethyl-1H-imidazole 3-oxide (4au)*

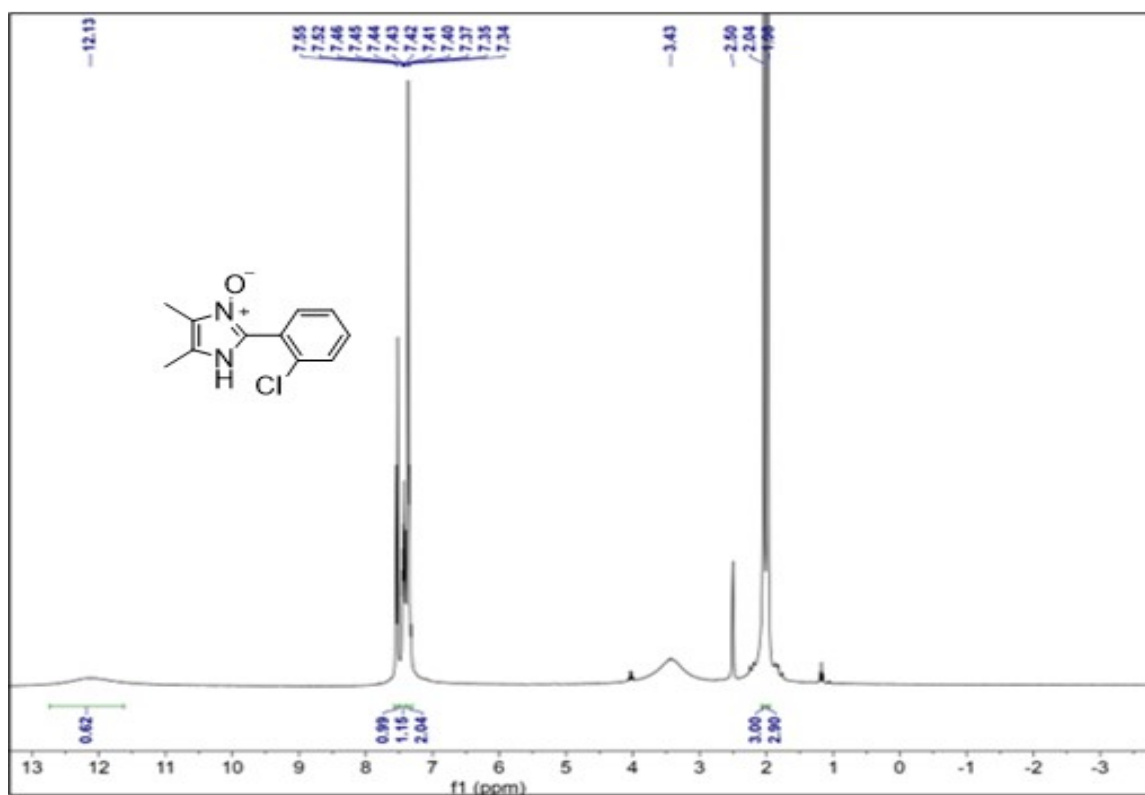

*<sup>13</sup>CNMR - 2-(2-chlorophenyl)-1-hydroxy-4,5-dimethyl-1H-imidazole 3-oxide (4au)*

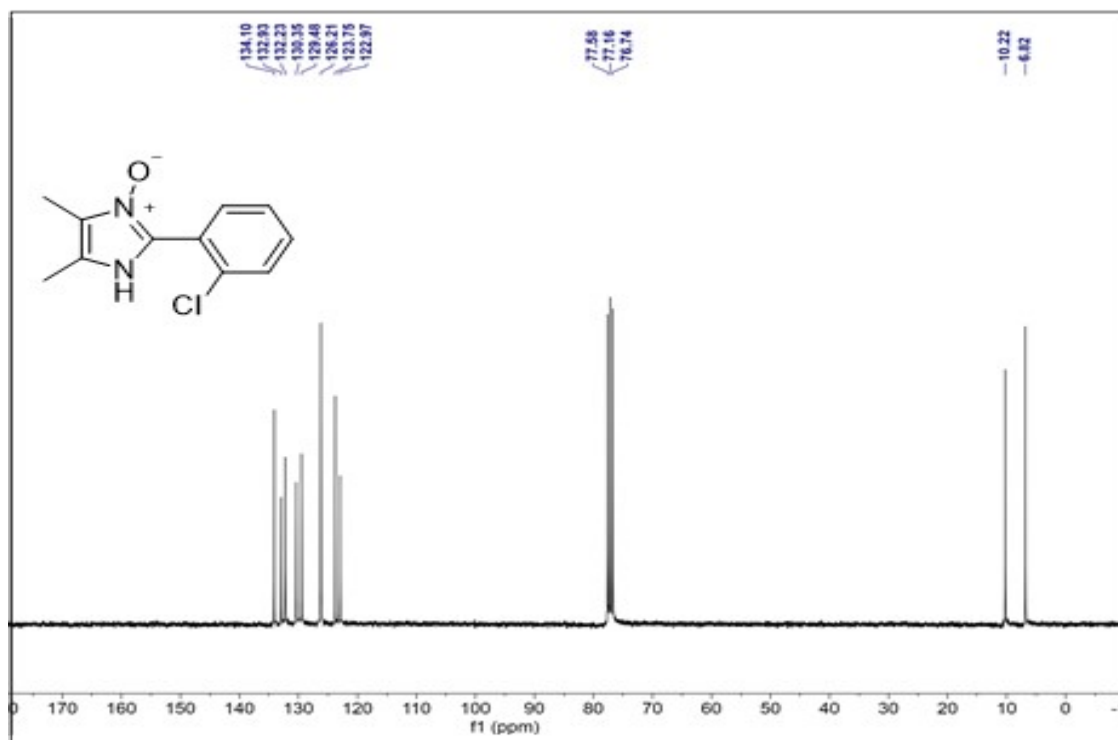

*HRMS - 2-(2-chlorophenyl)-1-hydroxy-4,5-dimethyl-1H-imidazole 3-oxide (4au)*

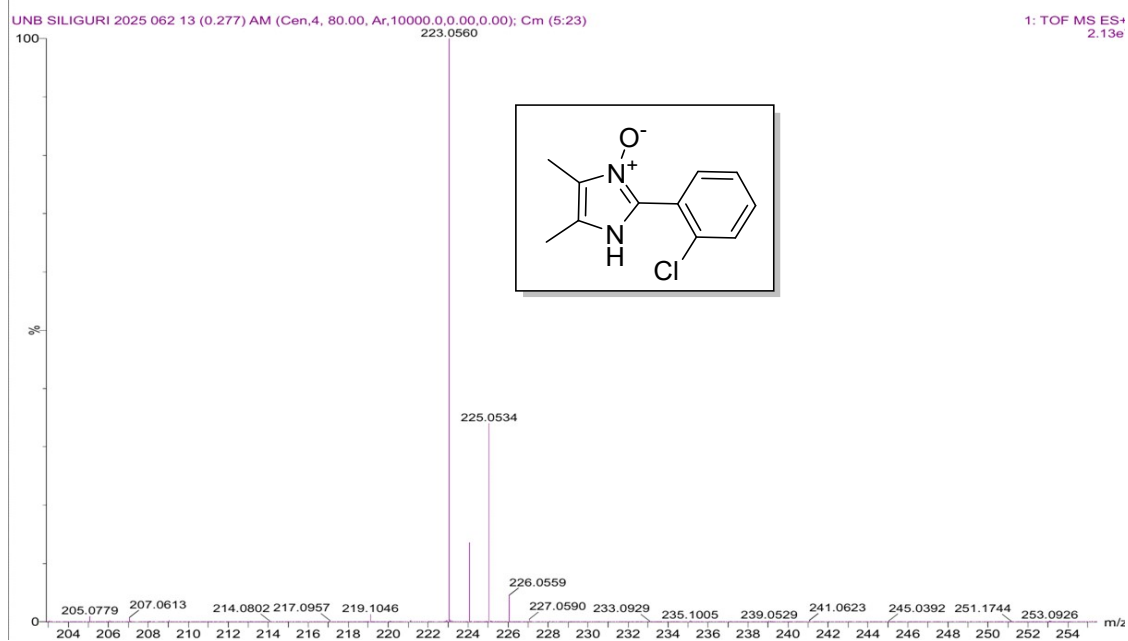

*<sup>1</sup>HNMR - 2-(2-chlorophenyl)-1-hydroxy-4,5-dimethyl-1H-imidazole 3-oxide (4av)*

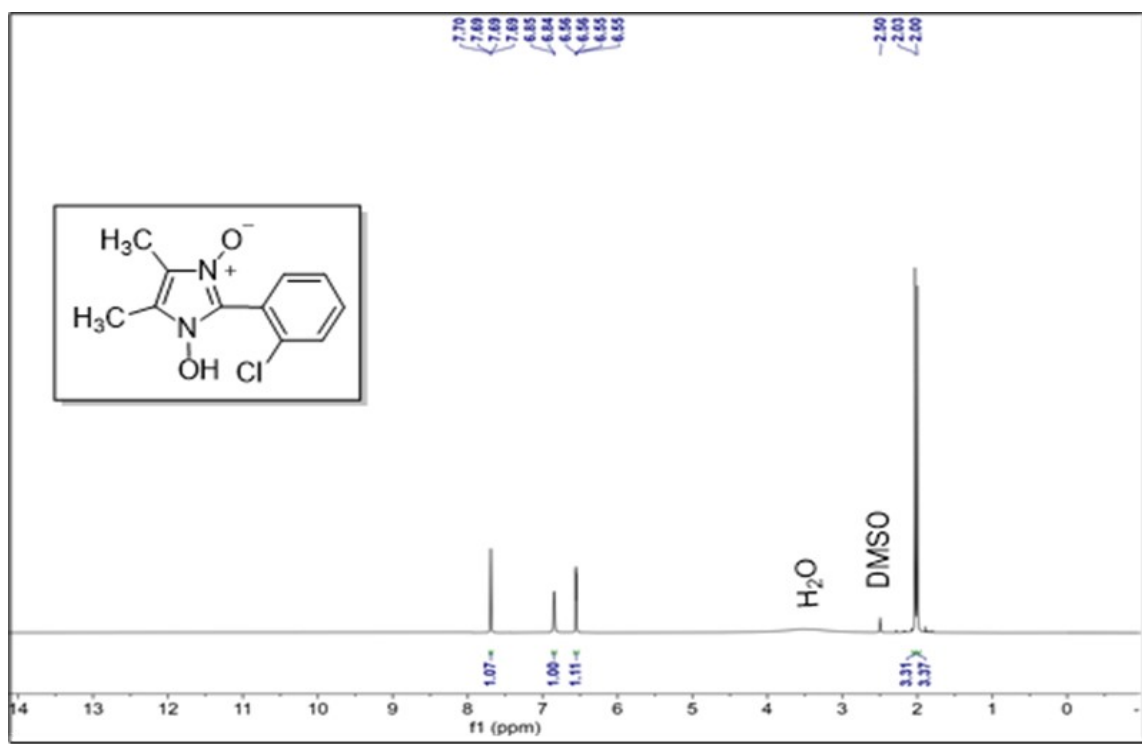

*<sup>13</sup>CNMR - 2-(2-chlorophenyl)-1-hydroxy-4,5-dimethyl-1H-imidazole 3-oxide (4av)*

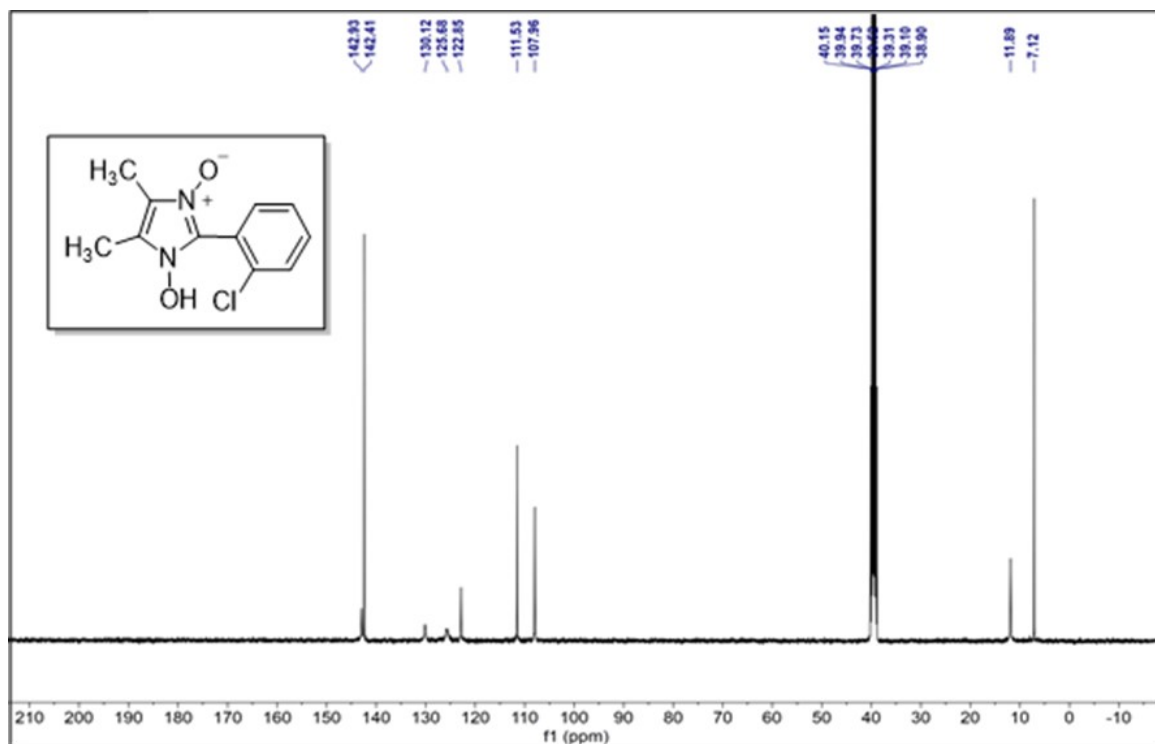

*HRMS - 2-(2-chlorophenyl)-1-hydroxy-4,5-dimethyl-1H-imidazole 3-oxide (4av)*

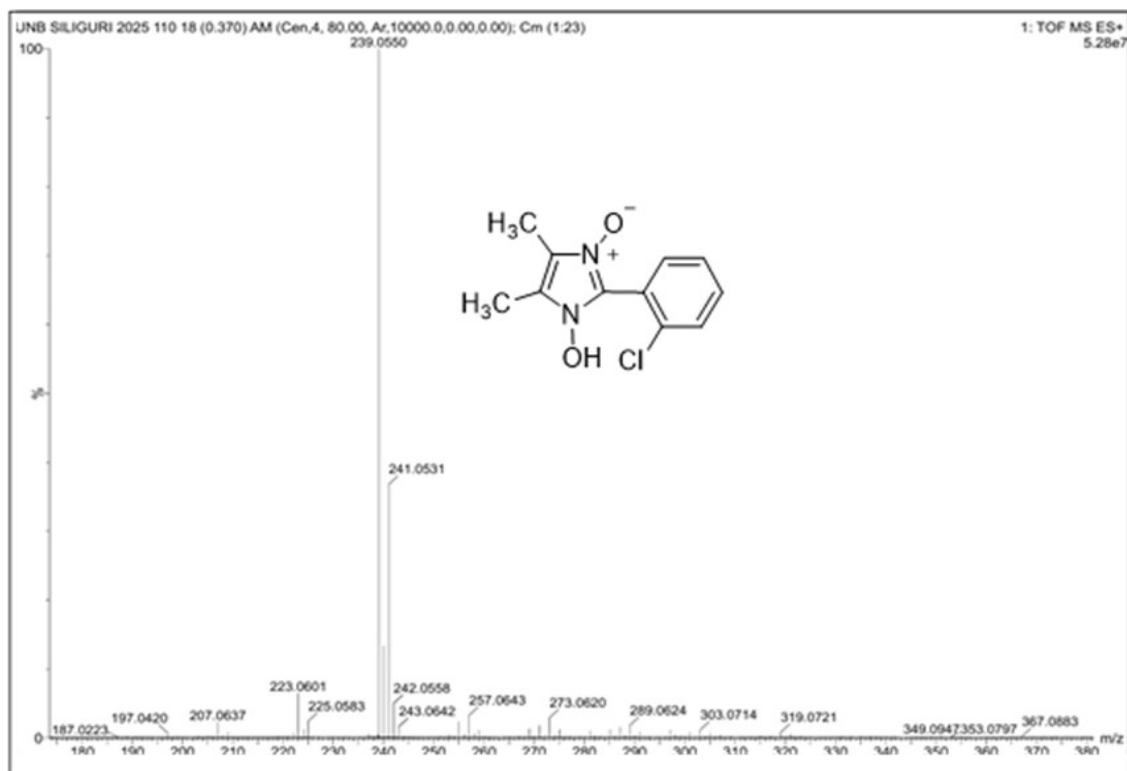

*<sup>1</sup>HNMR - 2-(4-Hydroxy-3-methoxyphenyl)-4,5-diphenyl Imidazole 3-oxide (4ba)*

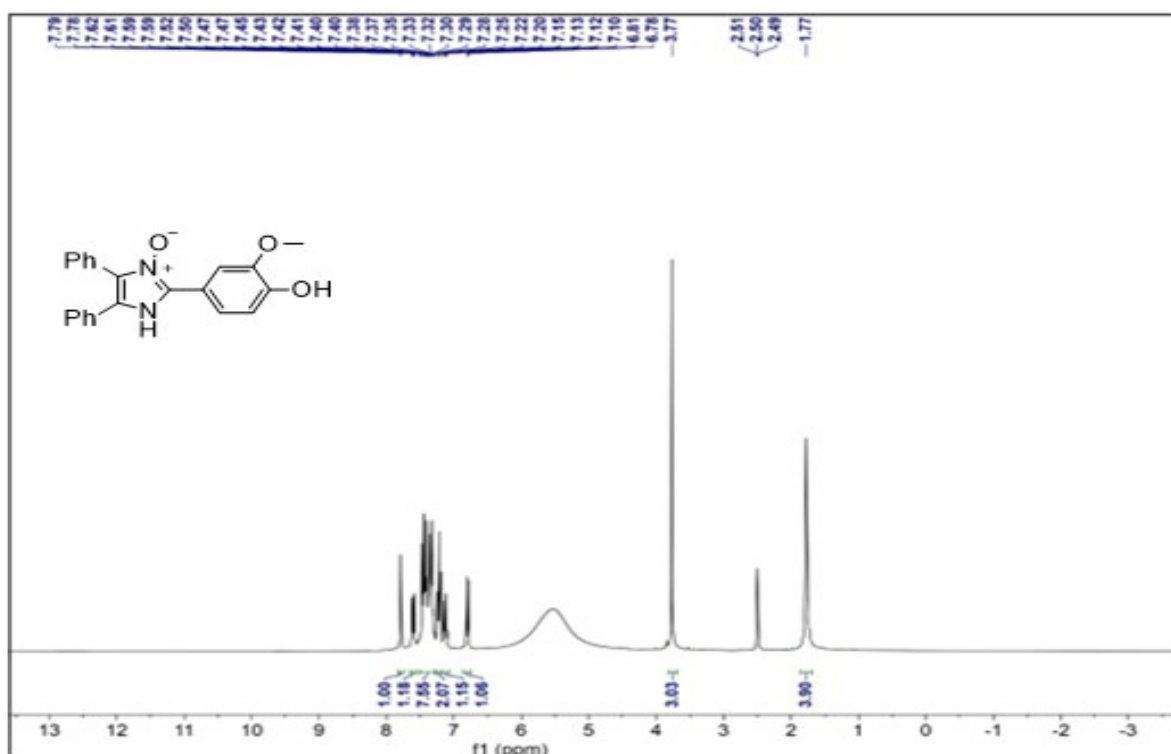

<sup>13</sup>CNMR - 2-(4-Hydroxy-3-methoxyphenyl)-4,5-diphenyl Imidazole 3-oxide (4ba)

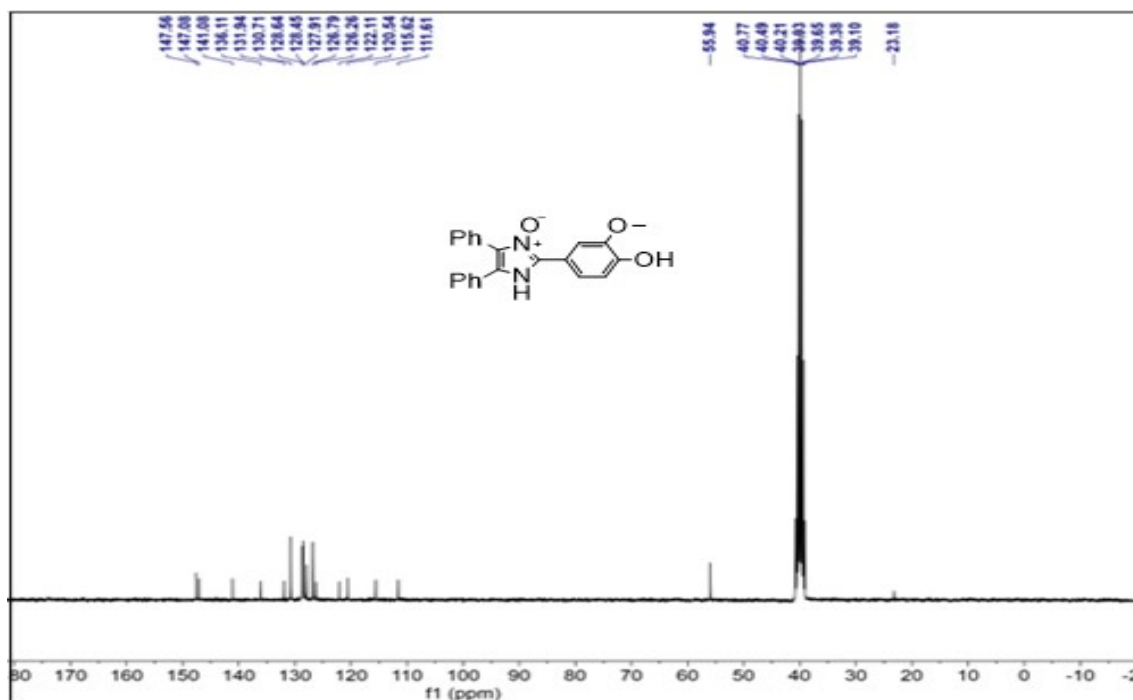

<sup>1</sup>H NMR - 2-(4-Hydroxyphenyl)-4,5-diphenyl Imidazole 3-oxide (4bc)

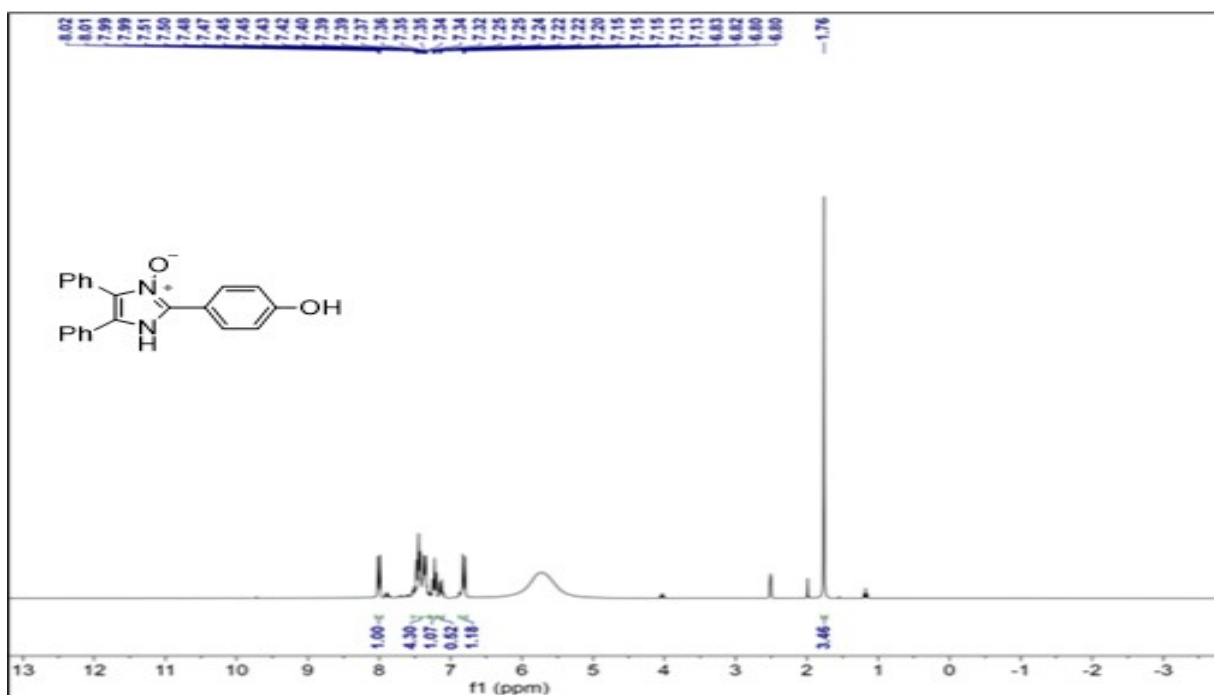

<sup>13</sup>CNMR - 2-(4-Hydroxyphenyl)-4,5-diphenyl Imidazole 3-oxide (4bc)

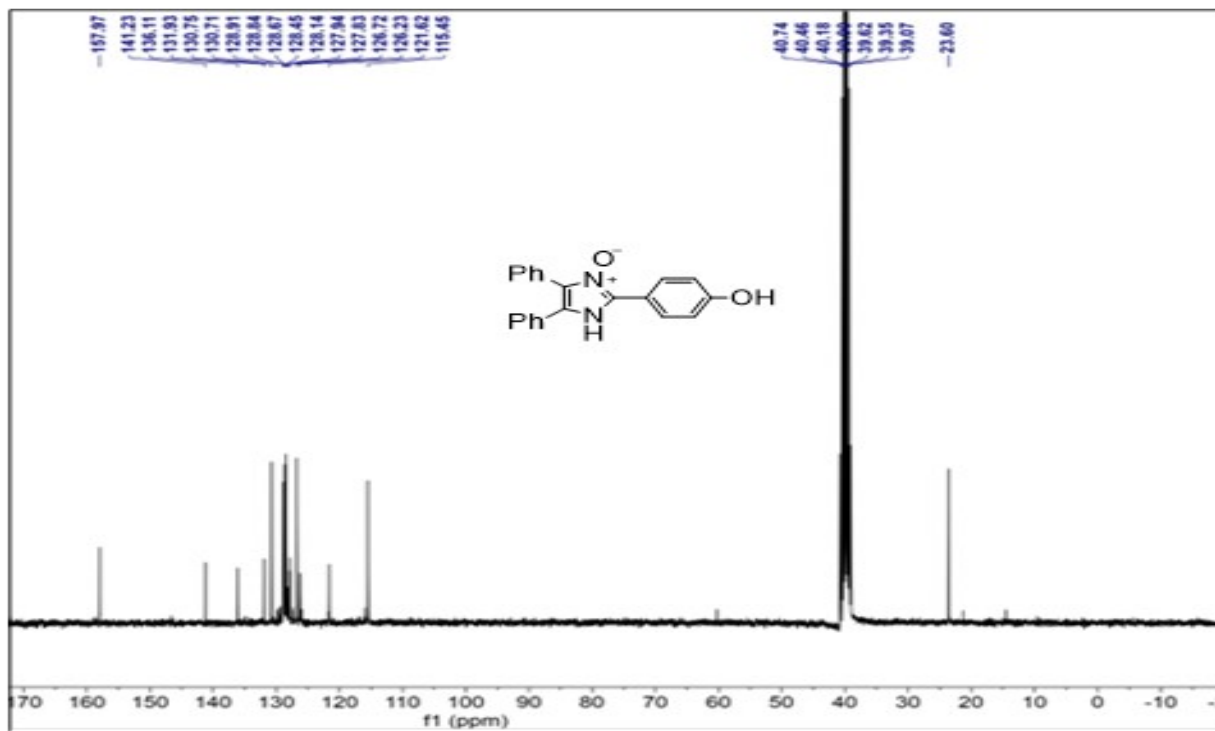

<sup>1</sup>H NMR - 1-(4-Chlorophenyl)-2-(4-hydroxyphenyl)-4,5-diphenyl Imidazole 3-oxide (4bd)

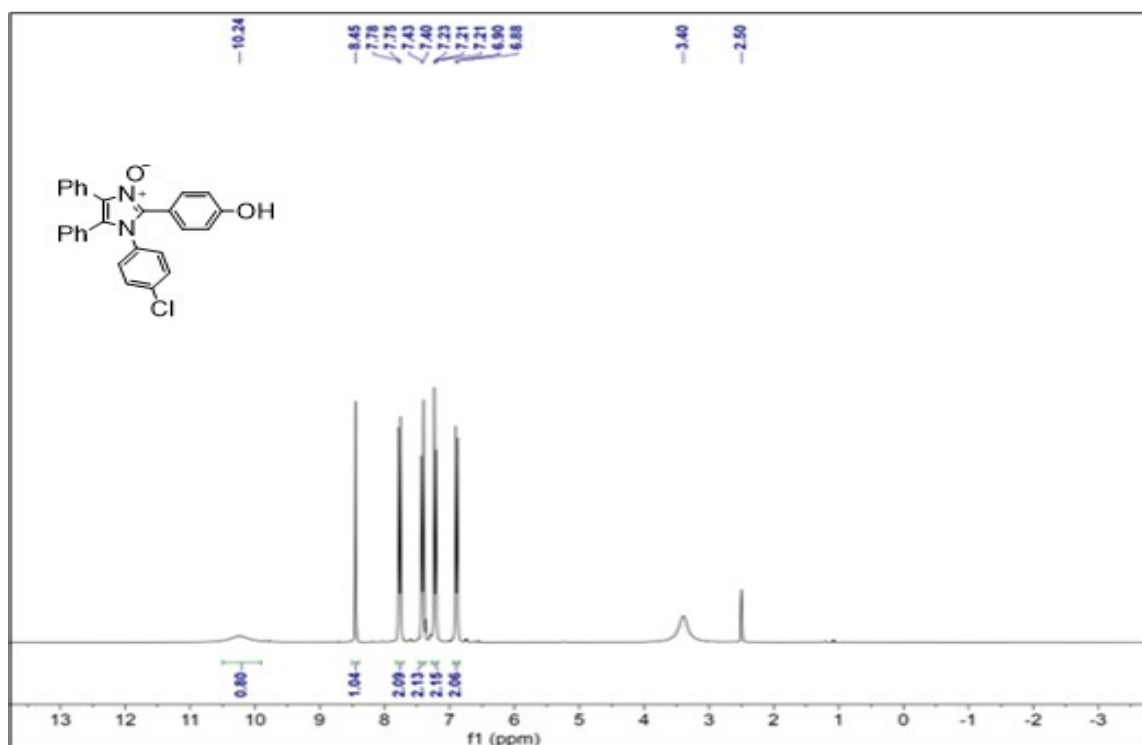

*<sup>13</sup>CNMR - 1-(4-Chlorophenyl)-2-(4-hydroxyphenyl)-4,5-diphenyl Imidazole 3-oxide (4bd)*

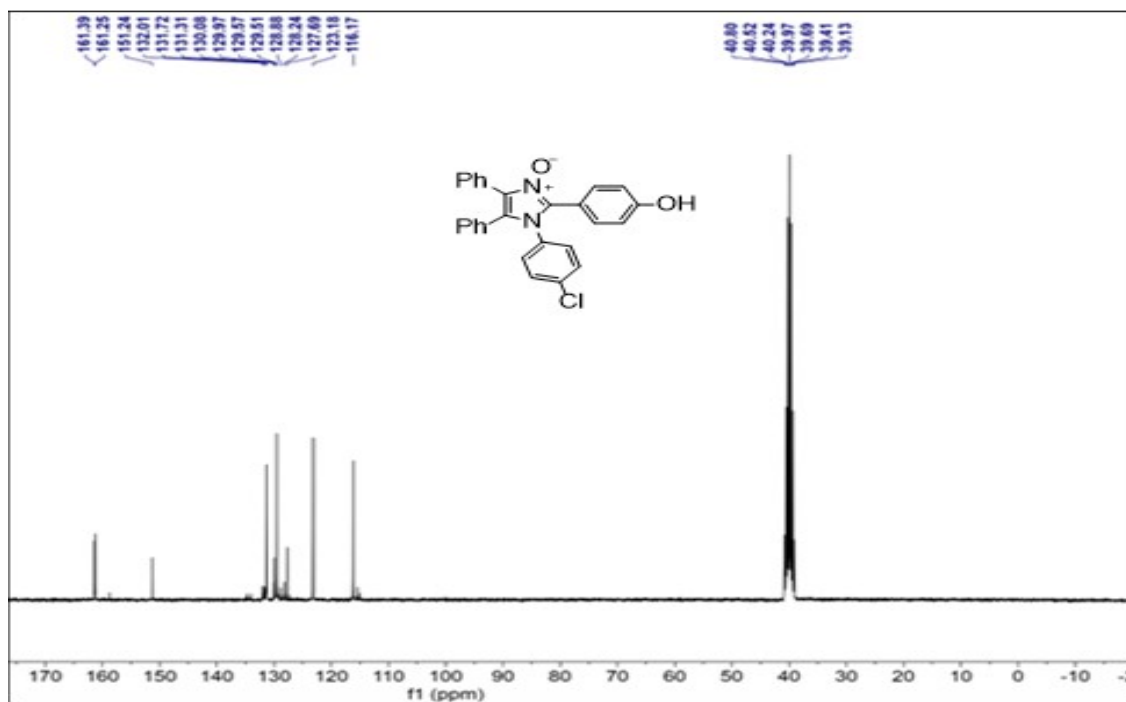

*<sup>1</sup>HNMR - 1-Hydroxy-2-(4-methoxyphenyl)-4,5-diphenyl Imidazole 3-oxide (4be)*

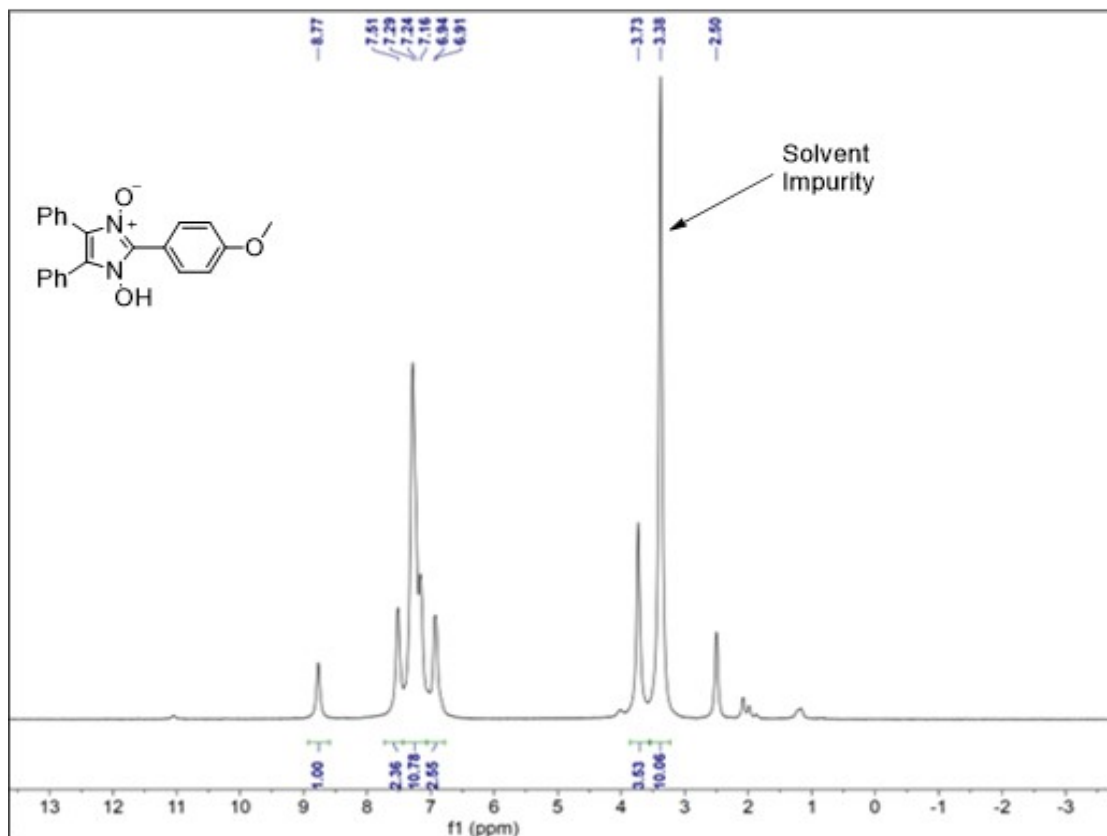

<sup>13</sup>CNMR - 1-Hydroxy-2-(4-methoxyphenyl)-4,5-diphenyl Imidazole 3-oxide (4be)

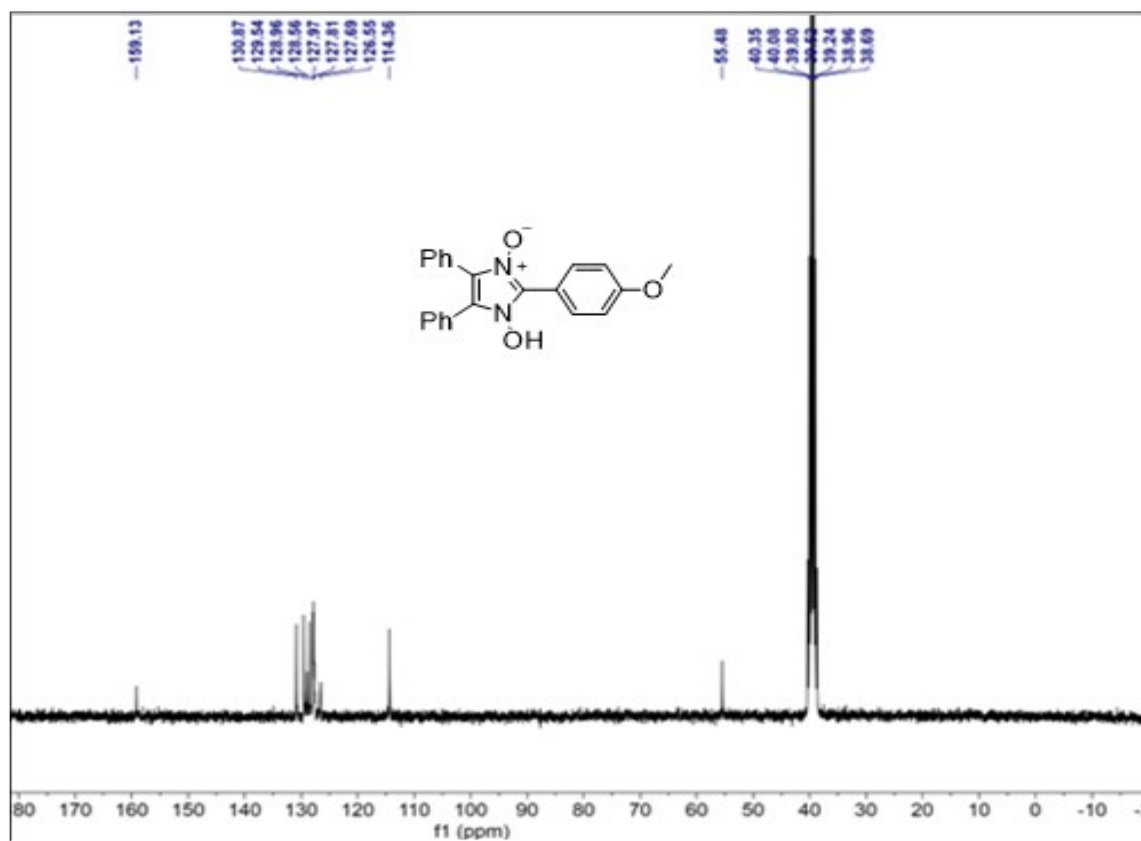

## Green Chemistry Parameters Calculations

The following formulae were used to calculate the green chemistry parameters: Effective Mass Yield (EMY), Atom Economy (AE), Atom Efficiency (AEf), Carbon Efficiency (CE), Reaction Mass Efficiency (RME), Optimum Efficiency (OE), Process Mass Intensity (PMI), Mass Intensity (MI), Mass Productivity (MP), E-factor, and Solvent and Water Intensity (SI and WI)<sup>3-16</sup>. The calculated data for compounds **4aa–4be** are presented in Table S1, S2, and S3.

$$\text{EMY (\%)} = \frac{\text{Mass of product}}{\text{Mass of non - benign reagents}} \times 100$$

$$\text{AE (\%)} = \frac{\text{Molecular weight of product}}{\text{Total molecular weight of reactants}} \times 100$$

$$\text{Aef (\%)} = \text{AE} \times \text{Yield \%}$$

$$\text{CE (\%)} = \frac{\text{Amount of carbon in the product}}{\text{Total carbon present in the reactants}} \times 100$$

$$\text{RME (\%)} = \frac{\text{Mass of isolated product}}{\text{Total mass of reactants}} \times 100$$

$$\text{OE (\%)} = \frac{\text{RME}}{\text{AE}} \times 100$$

PMI

=

$$\frac{\text{Total mass of input material in the whole process (including solvent(s) used during work - up)}}{\text{Mass of product}}$$

$$\text{MI} = \frac{\text{Total mass of input material in the whole process (excluding solvent(s))}}{\text{Mass of product}}$$

$$\text{MP (\%)} = \frac{1}{\text{MI}} \times 100$$

$$\text{E-factor} = \frac{\text{Total mass of wastes}}{\text{Mass of product}} = \frac{\text{Mass of raw materials} - \text{Mass of product}}{\text{Mass of product}}$$

$$\text{SI} = \frac{\text{Total mass of solvents excluding water in the whole process}}{\text{Mass of product}}$$

$$\text{WI} = \frac{\text{Total mass of water used in the whole process}}{\text{Mass of product}}$$

## Respective amounts

*Reagents:* 2,3-Butanedione monoxime: 0.101 g (MW: 101.1050 g);  $\alpha$ -Benzil monoxime: 0.225 g (MW: 225.2470); Ammonium acetate: 0.077 g (MW: 77.0830); Hydroxylamine hydrochloride: 0.069 g (MW: 69.4880); 3-Nitrobenzaldehyde: 0.151 g (MW: 151.1210); 2-

Nitrobenzaldehyde: 0.151 g (MW: 151.1210); 4-Methoxybenzaldehyde: 0.136 g (MW: 136.1500); 3-Methoxybenzaldehyde: 0.136 g (MW: 136.1500); 4-(Dimethylamino)benzaldehyde: 0.149 g (MW: 149.1930); 4-Hydroxybenzaldehyde: 0.122 g (MW: 122.1230); 2-Hydroxybenzaldehyde: 0.122 g (MW: 122.1230); 4-Hydroxy-3-methoxybenzaldehyde or Vanillin: 0.152 g (MW: 152.1490); Furan-2-carbaldehyde: 0.096 g (MW: 96.0850); Butan-1-amine: 0.073 g (MW: 73.1390); Naphthalen-1-amine: 0.143 g (MW: 143.1890); 2-Nitroaniline: 0.138 g (MW: 138.126); 4-Aminobenzoic acid: 0.137 g (MW: 137.1380); 4-Methoxyaniline: 0.123 g (MW: 123.1550); 2-Pyridinecarboxaldehyde or Picolinaldehyde: 0.107 g (MW: 107.1120); 4-Chlorobenzaldehyde: 0.140 g (MW: 140.5660); 2-Chlorobenzaldehyde: 0.140 g (MW: 140.5660); 4-Chloroaniline: 0.127 g (MW: 127.5710).

*Solvents:*

Mass of water used as solvents:  $2 \text{ mL} * 0.997 = 1.994 \text{ g}$

Mass of ethanol used as solvents:  $3 \text{ mL} * 0.789 = 2.367 \text{ g}$

Washing solvent EtOAc used:  $1 \text{ mL} * 0.902 = 0.902 \text{ g}$

**Table S1.** Related information for the calculations of the Green Metrics of the compounds **4aa-**

| <b>Compounds</b> | <b>Molecular Weight (MW) of product</b> | <b>Yield (%)</b> | <b>Mass of Product (g)</b> | <b>Total Molecular Weight (MW) of Reactants</b> | <b>Total Mass of Reactants (g)</b> |
|------------------|-----------------------------------------|------------------|----------------------------|-------------------------------------------------|------------------------------------|
| <b>4aa</b>       | 233.2270                                | 98               | 0.229                      | 329.3090                                        | 0.329                              |
| <b>4ab</b>       | 233.2270                                | 95               | 0.222                      | 329.3090                                        | 0.329                              |
| <b>4ac</b>       | 218.2560                                | 80               | 0.175                      | 314.3380                                        | 0.314                              |
| <b>4ad</b>       | 218.2560                                | 82               | 0.18                       | 314.3380                                        | 0.314                              |
| <b>4ae</b>       | 231.2990                                | 83               | 0.193                      | 327.3810                                        | 0.327                              |
| <b>4af</b>       | 204.2290                                | 82               | 0.168                      | 300.3110                                        | 0.300                              |
| <b>4ag</b>       | 204.2290                                | 86               | 0.176                      | 300.3110                                        | 0.300                              |
| <b>4ah</b>       | 234.2550                                | 84               | 0.198                      | 330.3370                                        | 0.330                              |
| <b>4ai</b>       | 178.1910                                | 88               | 0.157                      | 274.2730                                        | 0.274                              |
| <b>4aj</b>       | 260.3370                                | 85               | 0.222                      | 296.3670                                        | 0.296                              |
| <b>4ak</b>       | 330.3870                                | 87               | 0.289                      | 366.4170                                        | 0.366                              |
| <b>4al</b>       | 325.3240                                | 80               | 0.261                      | 361.3540                                        | 0.361                              |
| <b>4am</b>       | 324.3360                                | 78               | 0.254                      | 360.3660                                        | 0.360                              |
| <b>4an</b>       | 310.3530                                | 91               | 0.283                      | 346.3830                                        | 0.346                              |
| <b>4ao</b>       | 220.2280                                | 84               | 0.186                      | 292.7160                                        | 0.292                              |
| <b>4ap</b>       | 234.2550                                | 86               | 0.202                      | 306.7430                                        | 0.306                              |
| <b>4aq</b>       | 249.2260                                | 97               | 0.242                      | 321.7140                                        | 0.321                              |
| <b>4ar</b>       | 250.2540                                | 86               | 0.216                      | 322.7420                                        | 0.322                              |
| <b>4as</b>       | 205.2170                                | 88               | 0.181                      | 277.7050                                        | 0.277                              |
| <b>4at</b>       | 222.6720                                | 96               | 0.214                      | 318.7540                                        | 0.318                              |
| <b>4au</b>       | 222.6720                                | 93               | 0.208                      | 318.7540                                        | 0.318                              |
| <b>4av</b>       | 238.6710                                | 97               | 0.231                      | 311.1590                                        | 0.310                              |
| <b>4ba</b>       | 358.3970                                | 82               | 0.295                      | 454.4790                                        | 0.454                              |
| <b>4bb</b>       | 342.3980                                | 77               | 0.265                      | 438.4800                                        | 0.438                              |
| <b>4bc</b>       | 328.3710                                | 80               | 0.264                      | 424.4530                                        | 0.424                              |
| <b>4bd</b>       | 438.9110                                | 81               | 0.357                      | 474.9410                                        | 0.474                              |
| <b>4be</b>       | 358.3970                                | 81               | 0.292                      | 430.8850                                        | 0.430                              |

**4be.**

**Representative calculations of green metrics for 2-(3-Nitrophenyl)-4,5-dimethyl Imidazole 3-oxide [4aa]:**

$$\text{EMY (\%)} = \frac{\text{Mass of product}}{\text{Mass of non - benign reagents}} \times 100 = \frac{0.229 \text{ g}}{(0.101 \text{ g} + 0.077 \text{ g} + 0.151 \text{ g})} \times 100 = \frac{0.229 \text{ g}}{0.329 \text{ g}} \times 100 = 69.60$$

$$\text{AE (\%)} = \frac{\text{Molecular weight of product}}{\text{Total molecular weight of reactants}} \times 100 = \frac{233.227}{329.309} \times 100 = 70.82$$

$$\text{Aef (\%)} = \text{AE} \times \text{Yield (\%)} = 70.82 \times 98 (\%) = 69.40$$

$$\text{CE (\%)} = \frac{\text{Amount of carbon in the product}}{\text{Total carbon present in the reactants}} \times 100 = \frac{\left(\frac{0.229}{233.227}\right) \times 11}{(0.001 \times 4 + 0.001 \times 2 + 0.001 \times 7)} \times 100 = 83.08$$

$$\text{RME (\%)} = \frac{\text{Mass of isolated product}}{\text{Total mass of reactants}} \times 100 = \frac{0.229 \text{ g}}{(0.101 \text{ g} + 0.077 \text{ g} + 0.151 \text{ g})} \times 100 = 69.60$$

$$\text{OE (\%)} = \frac{\text{RME}}{\text{AE}} \times 100 = \frac{69.40}{70.82} \times 100 = 98.28$$

$$\text{PMI} = \frac{\text{Total mass of input material in the whole process (including solvent(s) used during work - up)}}{\text{Mass of product}} = \frac{0.101 \text{ g} + 0.077 \text{ g} + 0.151 \text{ g} + 0.05 \text{ g (catalyst)} + 1.99 \text{ g (water)} + 2.36 \text{ g (ethanol)}}{0.229 \text{ g}} = 24.58 \text{ (g/g)}$$

$$\text{MI} = \frac{\text{Total mass of input material in the whole process (excluding solvent(s))}}{\text{Mass of product}} = \frac{(0.101 \text{ g} + 0.077 \text{ g} + 0.151 \text{ g} + 0.05 \text{ g (catalyst)})}{0.229 \text{ g}} = 1.66 \text{ (g/g)}$$

$$\text{MP (\%)} = \frac{1}{\text{MI}} \times 100 = \frac{1}{1.66} \times 100 = 60.42$$

$$\text{E-factor} = \frac{\text{Total mass of wastes}}{\text{Mass of product}} = \frac{\text{Mass of raw materials} - \text{Mass of product}}{\text{Mass of product}} = \frac{0.101 \text{ g} + 0.077 \text{ g} + 0.151 \text{ g} - 0.229 \text{ g}}{0.229 \text{ g}} = 0.44$$

$$\text{SI} = \frac{\text{Total mass of solvents excluding water in the whole process}}{\text{Mass of product}} = \frac{2.36 \text{ g} + 0.9 \text{ g}}{0.229 \text{ g}} = 14.24 \text{ (g/g)}$$

$$\text{WI} = \frac{\text{Total mass of water used in the whole process}}{\text{Mass of product}} = \frac{1.99 \text{ g}}{0.229 \text{ g}} = 8.69 \text{ (g/g)}$$

**Table S2.** Green Chemistry Parameters (EMY, AE, AEf, CE, RME, OE and MP) for the

| Compound   | MW       | Yield (%) | Mass of Product | EMY (%) | AE (%) | AEf (%) | CE (%) | RME (%) | OE (%) | MP (%) |
|------------|----------|-----------|-----------------|---------|--------|---------|--------|---------|--------|--------|
| <b>4aa</b> | 233.2270 | 98%       | 229             | 69.60   | 70.82  | 69.40   | 83.08  | 69.60   | 98.28  | 60.42  |
| <b>4ab</b> | 233.2270 | 95        | 222             | 67.48   | 70.82  | 67.28   | 80.54  | 67.48   | 95.28  | 58.58  |
| <b>4ac</b> | 218.2560 | 80        | 175             | 55.73   | 69.43  | 55.54   | 68.72  | 55.73   | 80.27  | 48.08  |
| <b>4ad</b> | 218.2560 | 82        | 180             | 57.32   | 69.43  | 56.93   | 70.69  | 57.32   | 82.56  | 49.45  |
| <b>4ae</b> | 231.2990 | 83        | 193             | 59.02   | 70.56  | 58.56   | 72.32  | 59.02   | 83.65  | 51.19  |
| <b>4af</b> | 204.2290 | 82        | 168             | 56.00   | 68.01  | 55.77   | 69.61  | 56.00   | 82.34  | 48.00  |
| <b>4ag</b> | 204.2290 | 86        | 176             | 58.67   | 68.01  | 58.49   | 72.92  | 58.67   | 86.26  | 50.29  |
| <b>4ah</b> | 234.2550 | 84        | 198             | 60.00   | 70.91  | 59.56   | 72.45  | 60.00   | 84.61  | 52.11  |
| <b>4ai</b> | 178.1910 | 88        | 157             | 57.30   | 64.97  | 57.17   | 72.09  | 57.30   | 88.19  | 48.46  |
| <b>4aj</b> | 260.3370 | 85        | 222             | 75.00   | 87.84  | 74.66   | 85.27  | 75.00   | 85.38  | 64.16  |
| <b>4ak</b> | 330.3870 | 87        | 289             | 78.96   | 90.17  | 78.45   | 87.50  | 78.96   | 87.57  | 69.47  |
| <b>4al</b> | 325.3240 | 80        | 261             | 72.30   | 90.03  | 72.02   | 80.23  | 72.30   | 80.31  | 63.50  |
| <b>4am</b> | 324.3360 | 78        | 254             | 70.56   | 90.00  | 70.20   | 78.31  | 70.56   | 78.40  | 61.95  |
| <b>4an</b> | 310.3530 | 91        | 283             | 81.79   | 89.60  | 81.54   | 91.19  | 81.79   | 91.29  | 71.46  |
| <b>4ao</b> | 220.2280 | 84        | 186             | 63.70   | 75.24  | 63.20   | 84.46  | 63.70   | 84.66  | 54.39  |
| <b>4ap</b> | 234.2550 | 86        | 202             | 66.01   | 76.37  | 65.68   | 86.23  | 66.01   | 86.44  | 56.74  |
| <b>4aq</b> | 249.2260 | 97        | 242             | 75.39   | 77.47  | 75.15   | 97.10  | 75.39   | 97.31  | 65.23  |
| <b>4ar</b> | 250.2540 | 86        | 216             | 67.08   | 77.53  | 66.68   | 86.31  | 67.08   | 86.52  | 58.06  |
| <b>4as</b> | 205.2170 | 88        | 181             | 65.34   | 73.90  | 65.03   | 88.20  | 65.34   | 88.42  | 55.35  |
| <b>4at</b> | 222.6720 | 96        | 214             | 67.30   | 69.86  | 67.07   | 81.32  | 67.30   | 96.33  | 58.15  |
| <b>4au</b> | 222.6720 | 93        | 208             | 65.41   | 69.86  | 64.97   | 79.04  | 65.41   | 93.63  | 56.52  |
| <b>4av</b> | 238.6710 | 97        | 231             | 74.52   | 76.70  | 74.40   | 96.79  | 74.52   | 97.15  | 64.17  |
| <b>4ba</b> | 358.3970 | 82        | 295             | 64.98   | 78.86  | 64.67   | 74.83  | 64.98   | 82.40  | 58.53  |
| <b>4bb</b> | 342.3980 | 77        | 265             | 60.50   | 78.09  | 60.13   | 70.36  | 60.50   | 77.48  | 54.30  |
| <b>4bc</b> | 328.3710 | 80        | 264             | 62.26   | 77.37  | 61.90   | 72.74  | 62.26   | 80.48  | 55.70  |
| <b>4bd</b> | 438.9110 | 81        | 357             | 75.32   | 92.41  | 74.85   | 81.34  | 75.32   | 81.50  | 68.13  |
| <b>4be</b> | 358.3970 | 81        | 292             | 67.91   | 83.18  | 67.38   | 81.47  | 67.91   | 81.64  | 60.83  |

compounds **4aa-4be**.

Higher is the value, greener is the process.

**Table S3.** Green Chemistry Parameters (PMI, MI, E-factor, SI and WI) for the compounds 4aa-4be.

| <b>Product</b> | <b>PMI (g/g)</b> | <b>MI (g/g)</b> | <b>E-Factor (g/g)</b> | <b>SI (g/g)</b> | <b>WI (g/g)</b> |
|----------------|------------------|-----------------|-----------------------|-----------------|-----------------|
| 4aa            | 24.58            | 1.66            | 0.44                  | 14.24           | 8.69            |
| 4ab            | 25.36            | 1.71            | 0.48                  | 14.68           | 8.96            |
| 4ac            | 32.08            | 2.08            | 0.79                  | 18.63           | 11.37           |
| 4ad            | 31.19            | 2.02            | 0.74                  | 18.11           | 11.06           |
| 4ae            | 29.16            | 1.95            | 0.69                  | 16.89           | 10.31           |
| 4af            | 33.33            | 2.08            | 0.79                  | 19.40           | 11.85           |
| 4ag            | 31.82            | 1.99            | 0.70                  | 18.52           | 11.31           |
| 4ah            | 28.43            | 1.92            | 0.67                  | 16.46           | 10.05           |
| 4ai            | 35.50            | 2.06            | 0.75                  | 20.76           | 12.68           |
| 4aj            | 25.21            | 1.56            | 0.33                  | 14.68           | 8.96            |
| 4ak            | 19.61            | 1.44            | 0.27                  | 11.28           | 6.89            |
| 4al            | 21.69            | 1.57            | 0.38                  | 12.49           | 7.62            |
| 4am            | 22.28            | 1.61            | 0.42                  | 12.83           | 7.83            |
| 4an            | 19.95            | 1.40            | 0.22                  | 11.52           | 7.03            |
| 4ao            | 30.06            | 1.84            | 0.57                  | 17.53           | 10.70           |
| 4ap            | 27.75            | 1.76            | 0.51                  | 16.14           | 9.85            |
| 4aq            | 23.23            | 1.53            | 0.33                  | 13.47           | 8.22            |
| 4ar            | 26.03            | 1.72            | 0.49                  | 15.09           | 9.21            |
| 4as            | 30.81            | 1.81            | 0.53                  | 18.01           | 10.99           |
| 4at            | 26.25            | 1.72            | 0.49                  | 15.23           | 9.30            |
| 4au            | 27.01            | 1.77            | 0.53                  | 15.67           | 9.57            |
| 4av            | 24.29            | 1.56            | 0.34                  | 14.11           | 8.61            |
| 4ba            | 19.51            | 1.71            | 0.54                  | 11.05           | 6.75            |
| 4bb            | 21.65            | 1.84            | 0.65                  | 12.30           | 7.51            |
| 4bc            | 21.68            | 1.80            | 0.61                  | 12.35           | 7.54            |
| 4bd            | 16.17            | 1.47            | 0.33                  | 9.13            | 5.57            |
| 4be            | 19.62            | 1.64            | 0.47                  | 11.16           | 6.82            |

Lower is the value, better is the process.

## Reference

- (1) Furniss, B. S. *Vogel's Textbook of Practical Organic Chemistry*; Pearson Education India, 2011.
- (2) Pradhan, K.; Tiwary, B. K.; Hossain, M.; Chakraborty, R.; Nanda, A. K. A Mechanistic Study of Carbonyl Activation under Solvent-Free Conditions: Evidence Drawn from the Synthesis of Imidazoles. *RSC Adv.* **2016**, *6* (13), 10743–10749. <https://doi.org/10.1039/C5RA16386B>.
- (3) Roschangar, F.; A. Sheldon, R.; H. Senanayake, C. Overcoming Barriers to Green Chemistry in the Pharmaceutical Industry – the Green Aspiration Level™ Concept. *Green Chemistry* **2015**, *17* (2), 752–768. <https://doi.org/10.1039/C4GC01563K>.
- (4) Jiménez-González, C.; C. Constable, D. J.; S. Ponder, C. Evaluating the “Greenness” of Chemical Processes and Products in the Pharmaceutical Industry—a Green Metrics Primer. *Chemical Society Reviews* **2012**, *41* (4), 1485–1498. <https://doi.org/10.1039/C1CS15215G>.
- (5) Jimenez-Gonzalez, C.; Ponder, C. S.; Broxterman, Q. B.; Manley, J. B. Using the Right Green Yardstick: Why Process Mass Intensity Is Used in the Pharmaceutical Industry To Drive More Sustainable Processes. *Org. Process Res. Dev.* **2011**, *15* (4), 912–917. <https://doi.org/10.1021/op200097d>.
- (6) Augé, J. A New Rationale of Reaction Metrics for Green Chemistry. Mathematical Expression of the Environmental Impact Factor of Chemical Processes. *Green Chemistry* **2008**, *10* (2), 225–231. <https://doi.org/10.1039/B711274B>.
- (7) A. Sheldon, R. The E Factor: Fifteen Years On. *Green Chemistry* **2007**, *9* (12), 1273–1283. <https://doi.org/10.1039/B713736M>.
- (8) C. Constable, D. J.; D. Curzons, A.; L. Cunningham, V. Metrics to ‘Green’ Chemistry—Which Are the Best? *Green Chemistry* **2002**, *4* (6), 521–527. <https://doi.org/10.1039/B206169B>.
- (9) Trost, B. The Atom Economy—A Search for Synthetic Efficiency. *Science* **1991**, *254* (5037), 1471–1477. <https://doi.org/10.1126/science.1962206>.
- (10) Sheldon, R. A.; Bode, M. L.; Akakios, S. G. Metrics of Green Chemistry: Waste Minimization. *Current Opinion in Green and Sustainable Chemistry* **2022**, *33*, 100569. <https://doi.org/10.1016/j.cogsc.2021.100569>.
- (11) Tobiszewski, M.; Marć, M.; Gałuszka, A.; Namieśnik, J. Green Chemistry Metrics with Special Reference to Green Analytical Chemistry. *Molecules* **2015**, *20* (6), 10928–10946. <https://doi.org/10.3390/molecules200610928>.
- (12) Ganesh, K. N.; Zhang, D.; Miller, S. J.; Rossen, K.; Chirik, P. J.; Kozłowski, M. C.; Zimmerman, J. B.; Brooks, B. W.; Savage, P. E.; Allen, D. T.; Voutchkova-Kostal, A. M. Green Chemistry: A Framework for a Sustainable Future. *ACS Omega* **2021**, *6* (25), 16254–16258. <https://doi.org/10.1021/acsomega.1c03011>.
- (13) Centi, G.; Perathoner, S. Catalysis and Sustainable (Green) Chemistry. *Catalysis Today* **2003**, *77* (4), 287–297. [https://doi.org/10.1016/S0920-5861\(02\)00374-7](https://doi.org/10.1016/S0920-5861(02)00374-7).
- (14) Martínez, J.; Cortés, J. F.; Miranda, R. Green Chemistry Metrics, A Review. *Processes* **2022**, *10* (7). <https://doi.org/10.3390/pr10071274>.
- (15) Sheldon, R. A. Metrics of Green Chemistry and Sustainability: Past, Present, and Future. *ACS Sustainable Chem. Eng.* **2018**, *6* (1), 32–48. <https://doi.org/10.1021/acssuschemeng.7b03505>.
- (16) Brahmachari, G.; Nurjamal, K.; Karmakar, I.; Begam, S.; Nayek, N.; Mandal, B. Development of a Water-Mediated and Catalyst-Free Green Protocol for Easy Access to a Huge Array of Diverse and Densely Functionalized Pyrido[2,3-d:6,5-D']Dipyrimidines via One-Pot Multicomponent Reaction under Ambient Conditions. *ACS Sustainable Chem. Eng.* **2017**, *5* (10), 9494–9505. <https://doi.org/10.1021/acssuschemeng.7b02696>.
